# Supplementary material
Source: PubMed Central journal article supplement (PMC8506296)
Supplement: jama-e2117272-s001.pdf [file jama-e2117272-s001.pdf]

ACTIV-IV COVID-19 Outpatient Thrombosis Prevention Trial

Version: 5.7

1  
2  
3  
4  
5  
6  
7  
8  
9  
10  
11  
12  
13  
14  
15  
16  
17  
18  
19  
20  
21  
22  
23  
24  
25  
26  
27

**COVID-19 Outpatient Thrombosis Prevention Trial  
within ACTIV-4:**

**A multicenter adaptive randomized placebo-controlled platform trial evaluating the efficacy and safety of antithrombotic strategies in COVID-19 adults not requiring hospitalization at time of diagnosis**

**Sponsor: University of Pittsburgh**

Frank Scirba, MD  
Professor of Medicine  
4420 Bayard Street, Suite 600  
Pittsburgh, PA 15260

**Version number: 5.7**

**June 2 , 2021**

## ACTIV-IV COVID-19 Outpatient Thrombosis Prevention Trial

Version: 5.7

|                                |                                                                                                                                                                                                                                                                                                                                         |
|--------------------------------|-----------------------------------------------------------------------------------------------------------------------------------------------------------------------------------------------------------------------------------------------------------------------------------------------------------------------------------------|
| <b>Principal Investigator:</b> | <p>Jean M Connors, MD<br/> Hematology Division<br/> Brigham and Women's Hospital<br/> Associate Professor of Medicine<br/> Harvard Medical School<br/> 75 Francis Street<br/> Boston, MA 02115<br/> Tel. 617-840-3185<br/> Fax. 617-264-6388<br/> E-mail: jconnors@bwh.harvard.edu</p>                                                  |
| <b>Trial Chair</b>             | <p>Paul M Ridker, MD<br/> Eugene Braunwald Professor of Medicine<br/> Harvard Medical School<br/> Director, Center for Cardiovascular Disease<br/> Prevention<br/> Brigham and Women's Hospital<br/> 900 Commonwealth Avenue<br/> Boston, MA 02215<br/> Tel 617 -759-0716<br/> Fax 716-734-1508<br/> Email: pridker@bwh.harvard.edu</p> |
| <b>Coordinating Center</b>     | <p>Stephen Wisniewski, PhD<br/> Professor of Epidemiology<br/> Vice Provost for Budget and Analytics<br/> University of Pittsburgh<br/> Tel:</p>                                                                                                                                                                                        |

## ACTIV-IV COVID-19 Outpatient Thrombosis Prevention Trial

Version: 5.7

|                                      |                                                                                                                                                                                                                                                                                                                                                                                                    |
|--------------------------------------|----------------------------------------------------------------------------------------------------------------------------------------------------------------------------------------------------------------------------------------------------------------------------------------------------------------------------------------------------------------------------------------------------|
|                                      | <p>FAX:</p> <p>Email: STEVEWIS@pitt.edu</p> <p>Frank Scirba, MD</p> <p>Professor of Medicine and Education</p> <p>Director of Emphysema/COPD, Research Center and Clinical Pulmonary Physiology Laboratories</p> <p>University of Pittsburgh</p> <p>Tel:</p> <p>Fax:</p> <p>Email: sciurba@upmc.edu</p>                                                                                            |
| <p><b>Trial Biostatisticians</b></p> | <p>Maria Mori Brooks, PhD</p> <p>Professor of Epidemiology and Biostatistics</p> <p>University of Pittsburgh, Graduate School of Public Health</p> <p>5119 Public Health Building / 130 De Soto Street</p> <p>Pittsburgh PA 15261</p> <p>Tel 412 624-1618</p> <p>FAX:</p> <p>Email mbrooks@pitt.edu</p> <p>Eric Leifer, PhD</p> <p>NHLBI</p> <p>leifere@nhlbi.nih.gov</p> <p>&lt;&lt; &gt;&gt;</p> |
|                                      | <p>Jerry A. Krishnan, MD, PhD</p>                                                                                                                                                                                                                                                                                                                                                                  |

## ACTIV-IV COVID-19 Outpatient Thrombosis Prevention Trial

Version: 5.7

|                                      |                                                                                                                                                                                                                                                          |
|--------------------------------------|----------------------------------------------------------------------------------------------------------------------------------------------------------------------------------------------------------------------------------------------------------|
| <b>Research Communication Center</b> | Professor of Medicine and Public Health<br>Associate Vice Chancellor for Population Health Sciences<br>University of Illinois at Chicago<br>1220 S. Wood Street, 3 <sup>rd</sup> Floor<br>Chicago, IL 60608<br>Tel 312-413-0637<br>Email: jakris@uic.edu |
| <b>NHLBI Representative</b>          | Andrei Kindzelski, MD<br>kindzleskial@nhlbi.nih.gov                                                                                                                                                                                                      |
| <b>HHS Representative</b>            | Rachel Harrigan<br>Rachel.Harrigan@hhs.gov                                                                                                                                                                                                               |
| <b>IND</b>                           | 152220                                                                                                                                                                                                                                                   |
| <b>ClinicalTrials.gov Identifier</b> | NCT04498273                                                                                                                                                                                                                                              |

28  
29  
30  
31  
32  
33  
34  
35  
36  
37  
38

## ACTIV-IV COVID-19 Outpatient Thrombosis Prevention Trial

Version: 5.7

39 **Statement of Compliance**

40

41 This study will be conducted in accordance with the Code of Federal Regulations on the  
42 Protection of Human Subjects (45 CFR Part 46), 21 CFR Parts 50, 56, 312, and 812 as  
43 applicable, any other applicable US government research regulations, and institutional research  
44 policies and procedures. The International Conference on Harmonisation (“ICH”) Guideline for  
45 Good Clinical Practice (“GCP”) (sometimes referred to as “ICH-GCP” or “E6”) will be applied  
46 only to the extent that it is compatible with FDA and DHHS regulations. The Principal  
47 Investigator will assure that no deviation from, or changes to the protocol will take place without  
48 prior agreement from the sponsor and documented approval from the Institutional Review Board  
49 (IRB), except where necessary to eliminate an immediate hazard(s) to the trial participants. All  
50 personnel involved in the conduct of this study have completed Human Subjects Protection  
51 Training.

52

53 The signature below provides the necessary assurance that this study will be conducted  
54 according to all stipulations of the protocol including statements regarding confidentiality, and  
55 according to local legal and regulatory requirements, US federal regulations, and ICH E6(R2)  
56 GCP guidelines.

57

58 Site Investigator Signature:

59

60

61 Signed: \_\_\_\_\_ Date: \_\_\_\_\_

62 Name and Title

63

64

65

66

67

68

## ACTIV-IV COVID-19 Outpatient Thrombosis Prevention Trial

Version: 5.7

69 **Table of Contents**

70

71 **Table of Contents**

|    |                                                                          |           |
|----|--------------------------------------------------------------------------|-----------|
| 72 | <b>STATEMENT OF COMPLIANCE .....</b>                                     | <b>5</b>  |
| 73 | <b>1 MASTER PROTOCOL SUMMARY .....</b>                                   | <b>10</b> |
| 74 | <b>2 INTRODUCTION .....</b>                                              | <b>13</b> |
| 75 | 2.1 BACKGROUND INFORMATION, SIGNIFICANCE, AND RELEVANT LITERATURE .....  | 13        |
| 76 | 2.2 THERAPEUTIC AGENT RATIONALE, POTENTIAL BENEFIT, POTENTIAL RISK ..... | 16        |
| 77 | <b>3 STUDY DESIGN .....</b>                                              | <b>19</b> |
| 78 | 3.1 OVERALL STUDY DESIGN .....                                           | 19        |
| 79 | 3.2 PRIMARY ENDPOINT .....                                               | 19        |
| 80 | 3.4 STUDY STAGES AND INTERVENTIONS.....                                  | 20        |
| 81 | 3.5 REGISTRY .....                                                       | 21        |
| 82 | 3.6 BIOBANK.....                                                         | 21        |
| 83 | <b>4 OBJECTIVES AND PURPOSE .....</b>                                    | <b>22</b> |
| 84 | 4.1 PRIMARY OBJECTIVE – STAGE 1 .....                                    | 22        |
| 85 | 4.2 SECONDARY OBJECTIVES – STAGE 1 .....                                 | 22        |
| 86 | 4.3 SAFETY OBJECTIVE.....                                                | 25        |
| 87 | <b>5 STUDY DESIGN .....</b>                                              | <b>25</b> |
| 88 | 5.1 STAGE 1 .....                                                        | 25        |
| 89 | 5.2 DURATION OF STUDY PARTICIPATION .....                                | 32        |
| 90 | 5.3 PRIMARY STUDY ENDPOINT .....                                         | 32        |
| 91 | 5.4 SECONDARY STUDY ENDPOINTS.....                                       | 32        |
| 92 | 5.5 SAFETY END POINTS .....                                              | 34        |
| 93 | 5.6 ADJUDICATION OF EVENTS .....                                         | 34        |

## ACTIV-IV COVID-19 Outpatient Thrombosis Prevention Trial

Version: 5.7

|     |           |                                                                      |           |
|-----|-----------|----------------------------------------------------------------------|-----------|
| 94  | <b>6</b>  | <b>STUDY POPULATION .....</b>                                        | <b>35</b> |
| 95  | 6.1       | INCLUSION CRITERIA .....                                             | 35        |
| 96  | 6.2       | EXCLUSION CRITERIA.....                                              | 36        |
| 97  | 6.3       | TOTAL NUMBER OF PARTICIPANTS .....                                   | 36        |
| 98  | 6.4       | STRATEGIES FOR RECRUITMENT AND RETENTION.....                        | 37        |
| 99  | <b>7</b>  | <b>STUDY ASSESSMENTS AND PROCEDURES .....</b>                        | <b>38</b> |
| 100 | 7.1       | STUDY ASSESSMENTS .....                                              | 39        |
| 101 | <b>8</b>  | <b>REASONS FOR WITHDRAWAL OR TERMINATION OF STUDY TREATMENT.....</b> | <b>40</b> |
| 102 | 8.1       | OCCURRENCE OF OUTCOME EVENTS .....                                   | 40        |
| 103 | 8.2       | VOLUNTARY WITHDRAWAL.....                                            | 40        |
| 104 | 8.3       | PREMATURE TERMINATION OR SUSPENSION OF STUDY.....                    | 41        |
| 105 | <b>9</b>  | <b>STUDY AGENTS .....</b>                                            | <b>42</b> |
| 106 | 9.1       | STUDY AGENT SUPPLY.....                                              | 42        |
| 107 | 9.2       | INDICATIONS FOR STOPPING ASSIGNED TREATMENT .....                    | 44        |
| 108 | 9.3       | INTERRUPTION OF STUDY TREATMENT.....                                 | 44        |
| 109 | 9.3.1     | <i>Outpatient bleeding</i> .....                                     | 44        |
| 110 | 9.3.2     | <i>Need for unblinding</i> .....                                     | 44        |
| 111 | <b>10</b> | <b>ADVERSE EVENTS.....</b>                                           | <b>45</b> |
| 112 | <b>11</b> | <b>STATISTICAL CONSIDERATIONS .....</b>                              | <b>47</b> |
| 113 | 11.1      | STATISTICAL AND ANALYTICAL PLANS (SAP) .....                         | 47        |
| 114 | 11.2      | POWER AND SAMPLE SIZE CALCULATIONS .....                             | 47        |
| 115 | 11.3      | PRIMARY OUTCOME ANALYSIS .....                                       | 49        |
| 116 | 11.4      | SECONDARY OUTCOME ANALYSES .....                                     | 50        |
| 117 | 11.5      | SUB-GROUP ANALYSES AND EFFECT MODIFICATION.....                      | 51        |
| 118 | 11.6      | SAFETY ANALYSES .....                                                | 51        |

## ACTIV-IV COVID-19 Outpatient Thrombosis Prevention Trial

Version: 5.7

|     |           |                                                                                |           |
|-----|-----------|--------------------------------------------------------------------------------|-----------|
| 119 | 11.7      | ADHERENCE AND RETENTION ANALYSES.....                                          | 52        |
| 120 | 11.8      | BASELINE DESCRIPTIVE STATISTICS .....                                          | 52        |
| 121 | 11.9      | PLANNED INTERIM ANALYSIS.....                                                  | 52        |
| 122 | 11.10     | SAFETY REVIEW .....                                                            | 54        |
| 123 | 11.11     | ANALYSES STRATIFIED BY BASELINE LEVELS OF D-DIMER AND CRP .....                | 54        |
| 124 | 11.12     | ANALYSES OF DURATION OF TREATMENT .....                                        | 55        |
| 125 | <b>12</b> | <b>QUALITY ASSURANCE AND QUALITY CONTROL .....</b>                             | <b>55</b> |
| 126 | <b>13</b> | <b>ETHICS/PROTECTION OF HUMAN SUBJECTS.....</b>                                | <b>56</b> |
| 127 | 13.1      | ETHICAL STANDARD.....                                                          | 56        |
| 128 | 13.2      | INSTITUTIONAL REVIEW BOARD.....                                                | 56        |
| 129 | 13.3      | INFORMED CONSENT PROCESS .....                                                 | 56        |
| 130 | 13.3.1    | <i>Consent and Other Informational Documents Provided to Participants.....</i> | <i>56</i> |
| 131 | 13.3.2    | <i>Consent Procedures and Documentation.....</i>                               | <i>57</i> |
| 132 | 13.4      | POSTING OF CLINICAL TRIAL CONSENT FORM.....                                    | 58        |
| 133 | 13.5      | PARTICIPANT AND DATA CONFIDENTIALITY .....                                     | 58        |
| 134 | <b>14</b> | <b>DATA HANDLING AND RECORD KEEPING .....</b>                                  | <b>60</b> |
| 135 | 14.1      | DATA COLLECTION AND MANAGEMENT RESPONSIBILITIES .....                          | 60        |
| 136 | 14.2      | STUDY RECORDS RETENTION.....                                                   | 61        |
| 137 | 14.3      | PROTOCOL DEVIATIONS.....                                                       | 61        |
| 138 | 14.4      | PUBLICATION AND DATA SHARING POLICY.....                                       | 62        |
| 139 | <b>15</b> | <b>STUDY FINANCES .....</b>                                                    | <b>63</b> |
| 140 | 15.1      | FUNDING SOURCE .....                                                           | 63        |
| 141 | 15.2      | COSTS TO THE PARTICIPANT .....                                                 | 63        |
| 142 | <b>16</b> | <b>CONFLICT OF INTEREST POLICY .....</b>                                       | <b>64</b> |
| 143 | <b>17</b> | <b>REFERENCES .....</b>                                                        | <b>65</b> |



ACTIV-IV COVID-19 Outpatient Thrombosis Prevention Trial

Version: 5.7

144 **18 APPENDIX A: DEFINITION AND DETERMINATION OF OUTCOMES ..... 68**

145 18.1 OUTCOME DEFINITIONS..... 68

146 **19 APPENDIX B STRONG INDUCERS/INHIBITORS OF P-GP AND CYP3A4 ..... 70**

147 **20 APPENDIX C: REQUIREMENTS FOR SITES ..... 72**

148 **21 APPENDIX D: CONSENT FORMS..... 72**

149 **22 APPENDIX E: DEFINITIONS OF COVID-19 SYMPTOMS ..... 73**

150 **23 APPENDIX F: ADVERSE EVENT COLLECTION AND REPORTING INFORMATION ..... 73**

151 **24 APPENDIX G: CALL CENTER STRUCTURE ..... 78**

152 **25 APPENDIX H: MONITORING PLAN FOR EFFICACY, FUTILITY AND SAFETY IN THE OUTPATIENT**

153 **TRIAL FOR DSMB REVIEW ..... 78**

154

155

156

157

## ACTIV-IV COVID-19 Outpatient Thrombosis Prevention Trial

Version: 5.7

158

159 **1 Master Protocol Summary**

|                   |                                                                                                                                                                                                                                                                                                                                                                                                                                                                                                                                                                                                                                                                                                                                                                                                                                                  |
|-------------------|--------------------------------------------------------------------------------------------------------------------------------------------------------------------------------------------------------------------------------------------------------------------------------------------------------------------------------------------------------------------------------------------------------------------------------------------------------------------------------------------------------------------------------------------------------------------------------------------------------------------------------------------------------------------------------------------------------------------------------------------------------------------------------------------------------------------------------------------------|
| Title             | <p>COVID-19 Outpatient Thrombosis Prevention Trial:</p> <p>A Multicenter Adaptive Randomized Double-Blind Placebo Controlled Platform Trial of the Efficacy and Safety of Antithrombotic Strategies in COVID-19 Adults not Requiring Hospitalization at Time of Diagnosis</p>                                                                                                                                                                                                                                                                                                                                                                                                                                                                                                                                                                    |
| Brief Summary     | <p>An adaptive randomized double-blind placebo-controlled platform trial to compare the effectiveness of anticoagulation with antiplatelet agents and with placebo to prevent thrombotic events in patients diagnosed with COVID-19 who are not admitted to hospital as COVID-19 related symptoms are currently stable.</p> <p>For outpatients not meeting eligibility criteria or who decline to participate in active treatment, participation in a registry component of this trial will be available, with a single follow up 45 days from entry</p> <p>Biobanking of samples to assess biomarkers of inflammation and coagulation will be available for centers able to participate in collection from eligible patients.</p>                                                                                                               |
| Primary Objective | <p>To compare the effects of treatment in COVID-19 patients not requiring hospitalization at time of diagnosis (WHO COVID-19 ordinal score 1-3) with (i) prophylactic dose anticoagulation; with (ii) therapeutic dose anticoagulation; with (iii) antiplatelet therapy; and with (iv) placebo relative to each other on the primary composite endpoint of symptomatic deep venous thrombosis, pulmonary embolism, arterial thromboembolism, myocardial infarction, ischemic stroke, need for hospitalization for cardiovascular/pulmonary events, and all-cause mortality for up to 45 days among the study population of non-hospitalized COVID-19 patients aged <math>\geq 40</math> years.</p> <p>Assessment of efficacy and safety endpoints will yield information of the net clinical benefit of different antithrombotic strategies.</p> |

## ACTIV-IV COVID-19 Outpatient Thrombosis Prevention Trial

Version: 5.7

|                                                       |                                                                                                                                                                                                                                                                                                                                                                                                                                                                                                                                                                                                                                                                                                                                                                                                                    |
|-------------------------------------------------------|--------------------------------------------------------------------------------------------------------------------------------------------------------------------------------------------------------------------------------------------------------------------------------------------------------------------------------------------------------------------------------------------------------------------------------------------------------------------------------------------------------------------------------------------------------------------------------------------------------------------------------------------------------------------------------------------------------------------------------------------------------------------------------------------------------------------|
| Methodology                                           | Adaptive double-blinded randomized controlled platform trial                                                                                                                                                                                                                                                                                                                                                                                                                                                                                                                                                                                                                                                                                                                                                       |
| Endpoint                                              | <p>Primary Endpoint: Composite endpoint of symptomatic deep venous thrombosis, pulmonary embolism, arterial thromboembolism, myocardial infarction, ischemic stroke, need for hospitalization for cardiovascular/pulmonary events, and all-cause mortality for up to 45 days after initiation of assigned treatment.</p> <p>Key Secondary Endpoints: Individual outcomes of the composite primary endpoint, the time-to-event for the composite primary endpoint, and a clinical rank-based score.</p> <p>Primary Safety Endpoint: Major bleeding (as defined by the ISTH) at end of randomized therapy (45 days) and after an additional 30 days of safety follow up (day 75).</p>                                                                                                                                |
| Participant Duration                                  | 45 days of assigned therapy with an additional 30-day safety follow up (i.e. a total of 75 days).                                                                                                                                                                                                                                                                                                                                                                                                                                                                                                                                                                                                                                                                                                                  |
| Population<br>Key Inclusion and<br>Exclusion Criteria | <p>Adults age <math>\geq 40</math> and <math>\leq 80</math> years found to be COVID-19 positive who do not require hospitalization due to stable COVID-19 related symptoms status.</p> <p>Participants will be enrolled from a variety of different facilities where (a) a clinician can evaluate the patient for inclusion and exclusion criteria, and (b) where blood samples can be arranged to be sent for D-dimer, hsCRP, calculated creatinine clearance, and platelet count. COVID-19 testing needs to be confirmed positive within the past 14 days.. Serum or urine pregnancy test results will be required for women of childbearing potential before starting study treatment.</p> <p>Patients with a contraindication to or requirement for anticoagulant/antithrombotic therapy are not eligible.</p> |
| Study Sites                                           | Approximately 100 sites                                                                                                                                                                                                                                                                                                                                                                                                                                                                                                                                                                                                                                                                                                                                                                                            |

## ACTIV-IV COVID-19 Outpatient Thrombosis Prevention Trial

Version: 5.7

|                                               |                                                                                                                                                                                                                                                                                                                                                                                                                                                                                                                                                                                                                                                                                                                                                                                                                                                                                                                          |
|-----------------------------------------------|--------------------------------------------------------------------------------------------------------------------------------------------------------------------------------------------------------------------------------------------------------------------------------------------------------------------------------------------------------------------------------------------------------------------------------------------------------------------------------------------------------------------------------------------------------------------------------------------------------------------------------------------------------------------------------------------------------------------------------------------------------------------------------------------------------------------------------------------------------------------------------------------------------------------------|
| Number of participants                        | The estimated sample size is approximately 7000 subjects. However, incorporating an adaptive design strategy will alter the final number of enrolled subjects.                                                                                                                                                                                                                                                                                                                                                                                                                                                                                                                                                                                                                                                                                                                                                           |
| Initial Description of Study Agents (Stage 1) | <p>Stage 1 is a four-arm trial incorporating:</p> <ol style="list-style-type: none"> <li>1. Anticoagulation: prophylactic dose apixaban 2.5mg po bid</li> <li>2. Anticoagulation: therapeutic dose apixaban 5.0mg po bid</li> <li>3. Antiplatelet agent: low dose aspirin 81mg po qd</li> <li>4. Placebo</li> </ol> <p>For trial efficiency and to maintain blind, all participants will be shipped via overnight courier two pill bottles with supply sufficient for the 45 day trial duration. For participant simplicity and to improve adherence and compliance, the bottles will be labeled “A-AM” and “B-PM” with the appropriate distribution of the above active agents and matching placebos. As such, all participants will be taking two identical appearing pills daily, regardless of randomized study arm assignment.</p> <p>An Adaptive Design will be used to drop or add arms in subsequent Stages.</p> |
| Key Procedures                                | See Stage-specific Appendix                                                                                                                                                                                                                                                                                                                                                                                                                                                                                                                                                                                                                                                                                                                                                                                                                                                                                              |
| Adaptive Design Considerations                | A modified intention-to-treat approach including only subjects who begin treatment will be used for primary trial analyses. The adaptive design embedded in this platform trial calls for evaluations of safety and efficacy overall and across multiple strata of admission D-dimer as well as admission hsCRP. In-trial data and specified decision rules will be used by the DSMB to suggest discontinuation of a specific trial arm due to safety concerns or clear evidence of efficacy or futility, thus allowing the trial to drop antithrombotic or anticoagulant agents or to add alternative therapies during the course of the trial (Stages 2 and beyond). Additional adaptive protocol issues will require DSMB evaluation including duration of therapy based on the timing of outcome events, both beneficial and potentially hazardous.                                                                  |

## ACTIV-IV COVID-19 Outpatient Thrombosis Prevention Trial

Version: 5.7

161

162 **2 INTRODUCTION**163 **2.1 Background information, significance, and relevant literature**

164 The COVID-19 pandemic has resulted in worldwide disruption in everyday life. Physicians  
165 accustomed to practicing evidenced based care are now faced with clinical situations for which  
166 no data are available to guide care.

167

168 The inflammatory response of most patients to infection with SARS-CoV2 is significant, with  
169 elevation in proinflammatory cytokine levels such as Il-6 and others, resulting in dramatic  
170 elevations in inflammatory biomarkers such as ESR and CRP.<sup>1,2,3,4,5,6</sup> The crosstalk between  
171 the coagulation system and activation of inflammatory pathways results in cytokine driven  
172 increases in procoagulant proteins such as fibrinogen, and activation of coagulation through  
173 numerous mechanisms including polyphosphates, NETs, and contact activation of the intrinsic  
174 pathway of the coagulation system. This significant inflammation in patients with SARS-CoV-2  
175 infection has been demonstrated with elevated levels of IL-6, increased CRP and ESR, and  
176 elevated fibrinogen and changes in coagulation tests results such as D-dimer and PT, even at  
177 initial presentation.<sup>7</sup> Given the tropism of the virus for ACE2 receptors, endothelial cells are a  
178 target. Direct viral infection of vascular endothelial cells results in apoptosis and loss of the  
179 normal protective antithrombotic environment provided by a number of natural anticoagulant  
180 activities.<sup>8</sup> The loss of the protective effect of vascular endothelial cells has been implicated in  
181 the development of microvascular thrombosis, especially in the alveolar capillaries as found on  
182 autopsy.<sup>9</sup> In addition, vascular endothelial cell activation and cell death leads to release of  
183 VWF, with high circulating levels adding to the procoagulant milieu. Recent data suggest that  
184 platelets may also play a role in the pathophysiology of COVID-19, with altered gene expression  
185 and platelet hyperreactivity noted in patients infected with SARS-CoV-2.<sup>10</sup> The aggregate effect  
186 of this increased inflammation and destruction of host cells is to produce a hypercoagulable  
187 phenotype in infected patients with risks for microvascular and macrovascular venous and  
188 arterial thrombotic events.

## ACTIV-IV COVID-19 Outpatient Thrombosis Prevention Trial

Version: 5.7

189  
190 Early data from Wuhan noted marked elevation in fibrinogen levels, inflammatory cytokines, and  
191 D-dimer levels, and noted that D-dimer tracked with mortality.<sup>3,4</sup>

192 Evidence of abnormal coagulation parameters associated with COVID-19 appeared in early  
193 reports from China. Baseline characteristics of the first 99 patients hospitalized in Wuhan found  
194 that 6% had an elevated aPTT, 5% elevated PT, 36% elevated D-dimer, increased biomarkers  
195 of inflammation including interleukin-6 (IL-6), erythrocyte sedimentation rate (ESR), and C-  
196 reactive protein (CRP).<sup>2</sup> Additional reports from another Wuhan hospital on the first 138  
197 patients found minimal elevations in PT and normal aPTT, but elevated D-dimers.<sup>3</sup> In an  
198 analysis of 191 patients from 2 of the main Wuhan hospitals, mortality was reported to be 28%  
199 (54-patients).<sup>19</sup> Factors associated with mortality included an elevated D-dimer > 1.0 mcg/mL  
200 on admission, increased PT, elevations in IL-6, and other biomarkers of inflammation, elevated  
201 troponin levels, and co-morbidities including older age, hypertension, diabetes, and coronary  
202 artery disease. Approximately 50% had evidence of coagulopathy defined as a 3-second PT  
203 increase or a 5-second increase in aPTT. In a multivariable logistic regression model of 171  
204 patients, a D-dimer level greater than 1.0 mcg/mL at admission was associated with increased  
205 mortality with an OR of 18.42 (2.64-128.55, p=0.003).<sup>4</sup>

206  
207 Following these early reports from China, data from other countries have substantiated the  
208 marked inflammation, elevated levels of procoagulant proteins, and inflammatory markers, and  
209 the association of increased D-dimer with more severe infection.<sup>6,11,12,13,14</sup> Multiple reports  
210 indicate an increased incidence of venous thromboembolism in COVID-19 positive patients,  
211 especially in those requiring ICU care, with cumulative incidences of symptomatic VTE roughly  
212 25% at 14 days despite the use of VTE prophylaxis, higher than historic VTE incidence in ICU  
213 patients.<sup>11,13</sup> Even when compared to similarly critically ill patients with ARDS or with influenza  
214 infection.<sup>12,14</sup> Use of surveillance ultrasound screening results in an even higher frequency with  
215 up to 70% of patients found to have VTE.<sup>15</sup> Arterial events including MI, ischemic stroke, and  
216 limb arterial thrombotic events occur, although much less frequently than venous.<sup>11</sup>

## ACTIV-IV COVID-19 Outpatient Thrombosis Prevention Trial

Version: 5.7

217  
218 Although the incidence of VTE in COVID-19 positive patients that do not require hospitalization  
219 at time of diagnosis has not been identified, PE found on autopsy reports have been believed to  
220 be the cause of death in patients never hospitalized who died at home.<sup>16</sup> Speculation about the  
221 current higher death rates than in past time matched periods in many cities with high prevalence  
222 of COVID-19 has centered on a multitude of possible COVID-19 related causes including PE.  
223 Many patients are diagnosed with VTE at the time of presentation to the emergency room, after  
224 having been symptomatic at home with COVID-19; PE may be a possible cause for sudden  
225 worsening of symptoms prompting medical attention. In a French review of CTPA performed on  
226 137 patients presenting from home with respiratory symptoms attributable to either pneumonia  
227 or PE, 23% of scans obtained in the emergency room were positive for PE, all were confirmed  
228 to have COVID-19.<sup>17</sup> Another similar evaluation found that PE were present in 18% of CTPA  
229 performed in the ER for outpatients ultimately diagnosed with COVID-19.<sup>18</sup> A US center found  
230 that 22% of patients presenting to the ER with respiratory complaints and eventually diagnosed  
231 with COVID-19 also had PE on CTPA.<sup>19</sup> Pulmonary microvascular thrombosis may also be  
232 responsible for the significant hypoxemia seen in COVID-19 positive patients.

233  
234 It is clear that patients with COVID-19 have marked inflammation and a hypercoagulable state  
235 that leads to venous and arterial thrombotic events, including microvascular thrombosis, and  
236 may contribute to pre-hospital mortality in patients infected with COVID-19. The appropriate  
237 strategy to prevent pre-hospital events is not known.

238  
239 We propose an adaptive double-blind randomized placebo-controlled platform trial to compare  
240 the effectiveness of anticoagulation with antiplatelet agents and with placebo to prevent  
241 thrombotic events in patients diagnosed with COVID-19. Available data demonstrate that both  
242 D-dimer levels and CRP levels can be used to select patients at higher risk for thrombotic  
243 events as part of a risk stratification score.<sup>20</sup> Patients diagnosed with COVID-19 not requiring  
244 hospitalization, ie those meeting criteria for WHO COVID-19 ordinal score of 1-3, will be

## ACTIV-IV COVID-19 Outpatient Thrombosis Prevention Trial

Version: 5.7

245 randomized initially to one of four strategies: placebo, low dose antiplatelet agent with low dose  
246 aspirin 81 mg, prophylactic dose anticoagulation with apixaban 2.5mg po bid, or therapeutic  
247 dose anticoagulation with apixaban 5.0 mg po bid. D-dimer and CRP are key variables that will  
248 be used to create patient subgroups since we hypothesize that the treatment effect on the  
249 primary outcome (and safety outcomes) may vary based on D-dimer or CRP level. The primary  
250 outcome will be a composite endpoint of symptomatic deep venous thrombosis, pulmonary  
251 embolism, arterial thromboembolism, myocardial infarction, ischemic stroke, need for  
252 hospitalization for cardiovascular/pulmonary events, and all-cause mortality for up to 45 days.  
253 The trial will adhere to adaptive design principles, with modifications of a number of variables  
254 based on evaluation of accrued in-trial data to inform the progressive shift in antithrombotic  
255 strategies towards the superior therapy. For example, should the therapeutic dose apixaban  
256 arm prove hazardous without greater benefit, this anticoagulant arm could be terminated early.  
257 In addition, if primary endpoint event rates are extremely low for patients with normal D-dimer  
258 and CRP, eligibility criteria may be modified to exclude this group of patients. These changes  
259 will be made through use of a pro-active DSMB structure in which the investigators are not  
260 directly involved in the formal decision-making process, thus maintaining overall trial integrity.

**261 2.2 Therapeutic agent rationale, potential benefit, potential risk**

262

263 The initial antithrombotic agents to be used in Stage 1 of this trial have been chosen for their  
264 potential for efficacy to reduce thrombotic events in COVID-19 patients not requiring  
265 hospitalization based on supporting efficacy data from clinical trials and ease of use in the  
266 outpatient setting. Risks associated with the use of the antiplatelet agent aspirin and  
267 anticoagulant treatment apixaban are primarily bleeding, with data available from a multitude of  
268 studies demonstrating low rates and acceptable safety profiles as described below, especially  
269 when one considers the 45 day treatment period.

270

271 Apixaban is an orally active, direct selective inhibitor of the coagulation factor Xa (FXa)  
272 developed by Bristol-Myers Squibb Company (BMS) and Pfizer as an anticoagulant agent. In



## ACTIV-IV COVID-19 Outpatient Thrombosis Prevention Trial

Version: 5.7

273 adults, apixaban has been administered orally (PO) as single and multiple doses of up to 50 mg  
274 and intravenously (IV) as single doses of up to 5 mg; the majority of subjects have received  
275 apixaban PO. Apixaban is authorized for marketing in 103 countries worldwide, including the  
276 European Union (EU), United States (US), and Japan. In the US, apixaban is approved in adults  
277 for the following: Reduction in the risk of ischemic stroke and SE in patients with NVAf,  
278 prophylaxis of DVT, which may lead to PE, in patients who have undergone hip or knee  
279 replacement surgery, treatment of DVT and PE, and for the reduction in the risk of recurrent  
280 DVT and PE following initial therapy. In the EU, apixaban has similar use indications.

281

282 For Stage 1 of the trial, in two of the arms, patients will be randomized to either the prophylactic  
283 dose of apixaban 2.5 mg po bid or to the therapeutic dose of apixaban 5 mg po bid for 45 days.  
284 Data from the AMPLIFY-Extension trial comparing the use of these 2 doses of apixaban with  
285 placebo for secondary VTE prophylaxis in high risk patients over 12 months noted similar  
286 reduction in recurrent VTE with both apixaban doses compared with placebo, with 63% and  
287 67% reductions in the primary endpoint of recurrent VTE or all-cause mortality.<sup>21</sup> Neither dose of  
288 apixaban increased the rate of major bleeding compared to placebo. Major bleeding rates were  
289 0.5% in the placebo group, 0.2% in the 2.5-mg apixaban group, and 0.1% in the 5-mg apixaban  
290 group, with rates of clinically relevant non-major bleeding of 2.3% in the placebo group, 3.0% in  
291 the 2.5-mg apixaban group, and 4.2% in the 5-mg apixaban group. The rate of death from any  
292 cause was 1.7% in the placebo group, as compared with 0.8% in the 2.5-mg apixaban group  
293 and 0.5% in the 5-mg apixaban group.<sup>21</sup> In subsequent stages of the trial, the adaptive design  
294 with pre-determined analyses of in-trial accrued data may drop individual treatment arms or  
295 change the duration of therapy for apixaban in response to findings of efficacy and safety.

296

297 While aspirin at 81 mg or 100 mg has a long track record of prevention of arterial thrombotic  
298 events<sup>22,23,24</sup> it also has demonstrated efficacy at reducing the risk of recurrent VTE as  
299 demonstrated in the WARFASA and ASPIRE trials.<sup>25,26</sup> High risk patients similar to those  
300 enrolled in the APMLIFY-Extension trial demonstrated over a 30% risk reduction in recurrent

## ACTIV-IV COVID-19 Outpatient Thrombosis Prevention Trial

Version: 5.7

301 VTE compared to placebo. Recent studies and meta-analyses suggest that aspirin is also  
302 effective in primary prevention of VTE, and has been shown to be as effective as other agents in  
303 post joint arthroplasty patients. The RR of VTE after hip and knee replacement surgery was  
304 1.12 (95% CI, 0.78-1.62) for aspirin compared with other anticoagulants.<sup>27</sup> The safety profile of  
305 low dose aspirin was demonstrated by the extremely low major bleeding rates in these trials,  
306 with only 1 major bleed in 205 patients taking aspirin and 1 major bleed in the 197 patients  
307 taking placebo in the WARFASA trial over a median duration of 24 months on treatment.<sup>25</sup>  
308 However, the utility of low dose aspirin in the setting of outpatient COVID-19 is unknown.

309

310 Recently diagnosed and symptomatic COVID-19 patients will be eligible for the main trial if they  
311 have no contraindications to anticoagulation or anti-thrombotic therapy. As described below, the  
312 pre-specified analysis plan will address the net benefit to risk ratio of antithrombotic and  
313 anticoagulant strategies across ranges of D-dimer and hsCRP at baseline.

314

315 For patients not meeting eligibility criteria for enrollment into the active treatment/placebo trial,  
316 enrollment in a companion registry trial can be offered. The registry will prospectively collect  
317 data in parallel with the active treatment trial, evaluating similar outcomes and obtaining useful  
318 information to inform further investigation.

319

320 In summary, the proinflammatory and procoagulant state with resultant thrombotic events  
321 associated with COVID-19 indicate a need to address the thrombotic risks of infected patients in  
322 the outpatient setting. There is equipoise regarding the best strategy for preventing thrombotic  
323 events among patients with confirmed SARS-Cov-2 infection not requiring hospitalization. The  
324 trial addresses this need with a double-blinded randomized placebo-controlled platform trial  
325 initially evaluating apixaban compared to aspirin using an adaptive design to allow assessment  
326 of accrued in-trial data to maximize the results and generate answers to current management  
327 questions that have developed during this pandemic and for which no answers currently exist.

## ACTIV-IV COVID-19 Outpatient Thrombosis Prevention Trial

Version: 5.7

328

329 **3 Study Design**330 **3.1 Overall study design**

331 This platform trial features multiple adaptive design elements inclusive of approaches to early  
332 stopping and changes in intervention based on accrued in-trial data. As such, the design is  
333 intended to adapt to new information as it becomes available in this rapidly evolving clinical and  
334 research environment, with updates to the design and execution. This trial is also designed to be  
335 flexible in this rapidly evolving clinical and research environment, and incorporates the ability to  
336 rapidly update the design and execution as new information on the science and understanding of  
337 COVID-19 pathology and the role of standard of care and treatment modalities becomes  
338 available. Each period of the study where intervention arms are added or dropped will be  
339 considered a separate study Stage.

340

341 **3.2 Primary Endpoint**

342 The primary endpoint, analyzed as a binary outcome, is the composite endpoint of symptomatic  
343 deep venous thrombosis, pulmonary embolism, arterial thromboembolism, myocardial infarction,  
344 ischemic stroke, need for hospitalization for cardiovascular/pulmonary events, and all-cause  
345 mortality for up to 45 days after initiation of assigned therapy. All events suggestive of the primary  
346 outcome will be adjudicated by an independent Adjudication Committee.

347

348 **3.3 Randomization**

349

350 Initial Stage 1 randomization assignments will be performed for patients at baseline. Subjects  
351 will be randomized (1:1:1:1 ratio) to apixaban 2.5 mg bid, apixaban 5 mg bid, aspirin 81 mg qd +  
352 placebo, (Groups 1 to 4 as in the table below using a centralized service). A permuted block

## ACTIV-IV COVID-19 Outpatient Thrombosis Prevention Trial

Version: 5.7

353 design, stratified by country, will be used to allocate equal numbers of participants to each of the  
354 four designated interventions included in the current study stage.

### 355 **3.4 Study Stages and Interventions**

356 The first Stage of this study has been determined and is outlined above. In Stage 1, there will be  
357 four intervention arms: (1) prophylactic anticoagulation with apixaban 2.5mg po bid; (2)  
358 therapeutic anticoagulation with apixaban 5.0mg op bid; (3) antiplatelet therapy with low dose  
359 aspirin 81mg po qd and (4) placebo. Subsequent Stages will incorporate recommendations from  
360 the DSMB based on the accrued in-trial data at pre-specified time-points or from a pre-specified  
361 number of patient events to adjust criteria for eligibility, assignment to treatment groups, and  
362 endpoints, and could include any combination of these.

363 At the outset of the trial, the overarching plan for adaptive changes are as follows:

- 364 1. **If an active drug is found to be futile relative to placebo** (i.e. results indicate that an  
365 active arm is associated with a slightly reduced risk, no effect, or a greater risk of the  
366 primary outcome as compared with placebo): The futile active arm will be dropped, no new  
367 treatment arm will be added, and the trial will continue with the remaining treatment arms.  
368 The randomization scheme will be adjusted to include the 3 remaining arms with equal  
369 probabilities (i.e. 1:1:1), and the treatment comparisons among these arms will continue as  
370 designed.  
371
- 372 2. **If an active drug is found to be superior to placebo**: We will declare a winner, and we will  
373 announce this finding. The placebo arm will be dropped. If the observed differences  
374 between the superior active arm and all of the other active arms are sizable (e.g. >20%  
375 relative reduction) but do not yet cross the decision boundary, the trial may be terminated  
376 based on a risk/benefit analysis by the DSMB. If the observed differences between the  
377 superior active arm and at least one of the other active arms is small, this would be  
378 announced, and the trial may continue with the “competitive arms” based on a risk/benefit  
379 analysis by the DSMB. The randomization scheme will be modified to assign each of the  
380 remaining treatment arms with an equal probability. The aspirin arm will become the  
381 reference arm for future statistical models.

## ACTIV-IV COVID-19 Outpatient Thrombosis Prevention Trial

Version: 5.7

382  
383 **3. If a promising new drug is identified from external studies:** At the outset of this trial, we  
384 do not plan on adding any new treatment arms. An anti-platelet drug and two doses of  
385 anticoagulant (prophylactic and therapeutic) were selected as the best candidates for  
386 treating COVID-19 in an outpatient setting based on the current available evidence.  
387 However, if a promising candidate drug were to be identified in the next 6 months, we will  
388 consider adding an arm to the trial based on time and other pragmatic considerations. The  
389 randomization scheme and analytic approach would be modified to include an extra  
390 treatment arm.

391

**3.5 Registry**

392  
393 For subjects not meeting eligibility criteria for enrollment into the active treatment/placebo trial, or  
394 those declining enrollment in active treatment, enrollment in a companion registry will be offered.  
395 The registry will prospectively collect data in parallel with the main trial, evaluating similar  
396 outcomes and obtaining useful information to inform further investigation. All demographic and  
397 baseline characteristics will be collected as for participants in the active treatment trial, however  
398 laboratory assessments will not be performed. Follow-up assessment by electronic  
399 communication or telephone will occur at 45 days, with screening for the same outcome events  
400 as for the active treatment trial.

401

**3.6 Biobank**

402

403  
404 The ability to biobank samples for further studies of biomarkers of inflammation and coagulation  
405 will be part of this trial. Centers with the capability of collecting, processing, and shipping samples  
406 can opt in for biobanking and collecting these samples from eligible and consented patients.

407

## ACTIV-IV COVID-19 Outpatient Thrombosis Prevention Trial

Version: 5.7

**4 Objectives and Purpose**

The overarching objective of this adaptive research design is to iteratively learn which therapeutic strategy is the best in COVID-19 patients presenting to an emergency department or other appropriate healthcare facility capable of performing all required assessments but not requiring hospitalization (WHO COVID-19 ordinal score 1-3) at time of diagnosis for the primary, secondary, and safety outcomes. At each Stage of the trial, we will identify the superior therapy that should be considered standard level of care for this population. The subsequent stage will introduce an alternative strategy and design that will be compared to this new standard of care in a similar fashion. This process will continue until no new strategies replace the standard of care.

**4.1 Primary Objective – Stage 1**

The primary objective is to determine the rate of the composite endpoint of symptomatic deep venous thrombosis, pulmonary embolism, arterial thromboembolism, myocardial infarction, ischemic stroke, need for hospitalization for cardiovascular/pulmonary events, and all-cause mortality for up to 45 days after initiation of assigned treatment.

423

**Objective 1:** To compare the effects of treatment in COVID-19 patients not requiring hospitalization at time of diagnosis (WHO COVID-19 ordinal score 1-3) with (i) anticoagulation at prophylactic doses; with (ii) anticoagulation at therapeutic doses; with (iii) antiplatelet therapy; and with (iv) placebo relative to each other on the primary composite endpoint of symptomatic deep venous thrombosis, pulmonary embolism, arterial thromboembolism, myocardial infarction, ischemic stroke, need for hospitalization for cardiovascular/pulmonary events, and all-cause mortality for up to 45 days after initiation of assigned treatment among the study population of non-hospitalized COVID-19 patients aged  $\geq 40$  years.

432

**4.2 Secondary Objectives – Stage 1**

**Objective 2:** To compare the effects of treatment in the outpatient setting with (i)

## ACTIV-IV COVID-19 Outpatient Thrombosis Prevention Trial

Version: 5.7

435 anticoagulation at prophylactic doses; with (ii) anticoagulation at therapeutic doses; (iii) with  
436 antiplatelet therapy; and with (iv) placebo relative to each other on need for hospitalization for  
437 cardiovascular/pulmonary events .

438

439 **Objective 3:** To compare the effects of treatment in the outpatient setting with (i)  
440 anticoagulation at prophylactic doses; with (ii) anticoagulation at therapeutic doses; (iii) with  
441 antiplatelet therapy; and with (iv) placebo relative to each other on the diagnosis of venous  
442 thromboembolism including symptomatic DVT and PE.

443

444 **Objective 4:** To compare the effects of treatment in the outpatient setting with (i)  
445 anticoagulation at prophylactic doses; with (ii) anticoagulation at therapeutic doses; (iii) with  
446 antiplatelet therapy; and with (iv) placebo relative to each other on arterial thrombotic events  
447 including MI, ischemic stroke, and arterial thromboembolism.

448

449 **Objective 5:** To compare the effects of treatment in the outpatient setting with (i)  
450 anticoagulation at prophylactic doses; with (ii) anticoagulation at therapeutic doses; (iii) with  
451 antiplatelet therapy; and with (iv) placebo relative to each other on all-cause mortality.

452

453 **Objective 6:** To compare the effects of treatment in the outpatient setting with (i)  
454 anticoagulation at prophylactic doses; with (ii) anticoagulation at therapeutic doses; (iii) with  
455 antiplatelet therapy; and with (iv) placebo relative to each other on the endpoint of mortality  
456 without antecedent hospitalization.

457

## ACTIV-IV COVID-19 Outpatient Thrombosis Prevention Trial

Version: 5.7

458 **Objective 7:** To compare the effects of treatment in COVID-19 patients not requiring  
459 hospitalization at time of diagnosis (WHO COVID-19 ordinal score 1-3) with (i) anticoagulation  
460 at prophylactic doses; with (ii) anticoagulation at therapeutic doses; with (iii) antiplatelet therapy;  
461 and with (iv) placebo relative to each other on the time-to-the primary composite endpoint of  
462 symptomatic deep venous thrombosis, pulmonary embolism, arterial thromboembolism,  
463 myocardial infarction, ischemic stroke, need for hospitalization for cardiovascular/pulmonary  
464 events, and all-cause mortality over 45 days after initiation of assigned treatment among the  
465 study population of non-hospitalized COVID-19 patients aged  $\geq 40$  years.

466

467 **Objective 8:** To compare the effects of treatment in COVID-19 patients not requiring  
468 hospitalization at time of diagnosis (WHO COVID-19 ordinal score 1-3) with (i) anticoagulation  
469 at prophylactic doses; with (ii) anticoagulation at therapeutic doses; with (iii) antiplatelet therapy;  
470 and with (iv) placebo relative to each other on a clinical rank-based score over 45 days after  
471 initiation of assigned treatment among the study population of non-hospitalized COVID-19  
472 patients aged  $\geq 40$  years.

473

474 **Objective 9:** To compare the effects of treatment in the outpatient setting of the (i) combined  
475 prophylactic and therapeutic doses of apixaban with (ii) placebo for the primary endpoints for  
476 efficacy and for safety.

477

478 Beyond these primary aims, a major interest of the trial is to address the net benefit-to-risk ratio  
479 for oral anticoagulation and oral antithrombotic therapy as compared to placebo across  
480 increasing thresholds of D-dimer and across increasing thresholds of hsCRP. These analyses  
481 will be pre-specified in the Statistical Analysis Plan and are part of the adaptive design of the  
482 overall trial; for example, should either net benefit or net risk relate to baseline levels of D-dimer  
483 or hsCRP in Stage 1, the DSMB (following guidelines established a priori by the investigative  
484 team) may indicate that thresholds for these biomarkers be selected going forward into new  
485 stages.



## ACTIV-IV COVID-19 Outpatient Thrombosis Prevention Trial

Version: 5.7

486

487 **4.3 Safety Objective**

488 To compare the effects of treatment with (i) with prophylactic dose anticoagulation with (ii)  
489 therapeutic dose anticoagulation and with (iii) antiplatelet therapy, both relative to placebo  
490 alone, on bleeding among the study population. Bleeding will be defined as (1) ISTH major or  
491 (2) ISTH clinically relevant non-major bleeding (CRNMB).<sup>28</sup> The development of disseminated  
492 intravascular coagulation (DIC) will also be evaluated. These will be analyzed at end of  
493 randomized therapy (45 days) and after an additional 30 days of safety follow up (day 75).

494

495 **5 STUDY DESIGN**

496 This trial design is built as a platform process with the possibility of multiple interventions being  
497 investigated iteratively over time. The trial is designed to be flexible, and these flexible aspects  
498 are planned as part of the protocol. This trial may incorporate a flexible number of interventions,  
499 and the number of interventions may evolve as the science evolves. Each period of the study  
500 where intervention arms are added or dropped will be considered a separate study *Stage*; the  
501 trial's analysis, however, will incorporate all Stages simultaneously via a single comprehensive  
502 model. An adaptive trial design will allow for "in-flight" changes to the protocol based on real-  
503 time data. Areas in which an adaptive design will be critical include the possible need to shorten  
504 the length of therapy depending on the timing of events, discontinuation of ineffective or unsafe  
505 treatment arms, changing antiplatelet or anticoagulant strategies, or adding new agents based  
506 on emerging science and data. We will also correlate outcomes with D-dimer and hsCRP levels  
507 evaluated at baseline, and patient characteristics/ demographic factors, in an ongoing manner  
508 to inform adaptation of entry criteria and treatment arms as needed.

509 **5.1 Stage 1**

510 The Stage 1 study is designed as a double-blinded randomized controlled platform trial of  
511 COVID-19 positive patients presenting to an emergency department, other appropriate health  
512 care facility, or research call center capable of performing or arranging for all required  
513 assessments. Participants will be recently diagnosed with symptoms (WHO COVID-19 ordinal

## ACTIV-IV COVID-19 Outpatient Thrombosis Prevention Trial

Version: 5.7

514 score 1-3) and age  $\geq$  40 years. In Stage 1, willing and able participants will initially be  
515 randomized to i) prophylactic anticoagulation with apixaban 2.5mg po bid (ii) therapeutic  
516 anticoagulation with apixaban 5.0 mg po bid; (iii) antiplatelet therapy with aspirin 81mg po qd or  
517 (iv) placebo in a 1:1:1:1 ratio.

518 .

519

520

521

522

523 Participants can be identified either in emergency departments or in appropriate healthcare  
524 facilities capable of performing all required assessments and perform or confirm COVID-19 test  
525 results. In addition to emergency department settings, these can include COVID-19 testing sites  
526 within hospitals such as adjacent tents, urgent care centers, and similar medical care facilities  
527 that have the ability to obtain CBC, creatinine, D-dimer, and CRP data at the time of COVID-19  
528 testing or with verification of positive SARS-CoV-2 PCR or antigen test within the past 14 days,  
529 pathway 5.1.1 A. Free standing test sites that identify positive patients can refer to central study  
530 staff of the research call center who will be able to determine eligibility based on criteria as  
531 described in section 6, Study Population, screen for the inclusion and exclusion criteria of the  
532 trial, and perform assessments and laboratory values described in section 7, see pathway 5.1.1  
533 B below. Hybrid models using a combination of steps for SARS-COV-2 testing, lab draws,  
534 consent and randomization from both ED/urgent care and freestanding test center pathways  
535 can be used as in 5.1.1 C. All participants must be able to have blood drawn for CBC,  
536 creatinine, D-dimer, and hsCRP; this can be performed by home health clinician visits or clinical  
537 facility and does not have to have performed at the time of the initial SARS-CoV-2 test. Test  
538 results do not have to be available prior to randomization but laboratory tests must be drawn  
539 prior to starting study treatment. Serum or urine pregnancy test results in WOCBP need to be  
540 known prior to starting study treatment.

## ACTIV-IV COVID-19 Outpatient Thrombosis Prevention Trial

Version: 5.7

541

542 All trial follow-up will be conducted directly from the Coordinating Center with the trial  
543 participants themselves using electronic contact and / or call center telephone contact on a  
544 regular basis over the planned 45-day treatment period and the additional 30 day safety follow  
545 up period. All double-blind trial medications will be packaged in child-proof containers and will  
546 be directly shipped on an overnight basis across the USA to the participants home address (see  
547 section 8, Study Agent) to maximize efficiency and minimize waste of study drug at centers not  
548 aggressively enrolling.

549

550 The overarching intent of this trial design is to minimize subject contact and minimize on-site in  
551 person study visits, given logistical considerations for social distancing during the COVID-19  
552 pandemic. Potential participants who are likely COVID-19 positive but not requiring  
553 hospitalization will be identified at participating sites. The study clinician will complete a set of  
554 inclusion and exclusion screening criteria through patient interview., Screen-eligible patients will  
555 be given information regarding participation in the trial. This may include a combination of in-  
556 person communication and video technology that describes the trial in layman's terms.

557

558

559

560

## 561 5.1.1 Pathways for enrollment

562 A. **ED, urgent care:** and other clinic sites capable of performing screening and all  
563 laboratory tests at the first visit can consent participants at this one visit and in  
564 person if participants meet eligibility criteria, and positive COVID-19 test results  
565 available from that day or within the past 14 days or pending. Laboratory tests can  
566 be drawn at this time and results can be evaluated before or after randomization.

## ACTIV-IV COVID-19 Outpatient Thrombosis Prevention Trial

Version: 5.7

567 Study medication will be shipped after randomization. Test results will be entered  
568 into the EDC; serum or urine pregnancy test results must be known before  
569 participant starts study treatment. Results returning after randomization that  
570 disqualify the participant for eligibility will be handled as below in 5.1.2. Follow  
571 schedule of assessments A.

572  
573 **B. Free-standing test centers** that identify symptomatic COVID-19 positive patients  
574 will call those patients that agreed at the time of testing to be contacted for possible  
575 participation in ACTIV-4b if the test is positive. Test center affiliates will perform brief  
576 screening and will transfer the patient to central clinical pharmacy study staff at the  
577 research call center, who will confirm interest and eligibility by telephone and perform  
578 electronic consent. Participants will then be randomized, drug will be shipped, and  
579 arrangements for home health RN visit with blood draw will be made. Participants will  
580 be instructed not to start medication until after blood draw occurs and serum or urine  
581 pregnancy test results, if applicable, are known. Lab results will be entered into the  
582 EDC. The home health visit RN will perform education and tell participant when to  
583 start treatment. Laboratory results returning after randomization that disqualify the  
584 participant for eligibility will be handled as below in 5.1.2. Follow schedule of  
585 assessments B.

586  
587 **C. Hybrid sites:** Sites that can identify symptomatic COVID-19 positive patients  
588 diagnosed within the past 14 days from any testing source or distribution list, such as  
589 affiliated ED or clinics, or free-standing test centers, can arrange for in person or  
590 remote visits to perform screening and baseline evaluation and arrange for required  
591 laboratory testing. Consent can be performed in person or remotely by electronic  
592 consent methods following the same procedure in 5.1.1 A or 5.1.1 B by site staff.  
593 Laboratory tests can be drawn before or after randomization, using on site  
594 laboratory testing, off-site laboratory testing, or home health visits. Drug will be  
595 shipped after randomization. Participants will be instructed on when to initiate study  
596 treatment after randomization; laboratory tests must be drawn before starting

## ACTIV-IV COVID-19 Outpatient Thrombosis Prevention Trial

Version: 5.7

597 treatment. Test results will be entered into the EDC. Serum or urine pregnancy test  
598 results must be known before participant starts study treatment. Results returning  
599 after randomization that disqualify the participant for eligibility will be handled as  
600 below in 5.1.2. Follow schedule of assessments A if drawing lab tests before  
601 randomization or B if drawing after randomization.

602  
603

604 D. Sites can enroll subjects in the registry component if the participant declines to  
605 participate in the active drug trial. Participation in the biobank component if available  
606 at the site will be offered at the time of consent.

607

608 5.1.2 Test results: If a participant is randomized before laboratory test results have returned,  
609 results will be entered into the EDC by the site or by electronic transfer from the test facility.  
610 Laboratory tests obtained after randomization must be entered within 72 hours of blood draw.  
611 Follow up contact of participants who do not meet eligibility requirements will be performed by  
612 enrolling sites if using the ED or hybrid site pathway or research call center pharmacist..  
613 Participants will be told to stop treatment and given instructions to return unused study drug.  
614 These participants will be followed for all efficacy and safety events for 45 days and for the 30  
615 day safety evaluation, and they will be included in the mITT analysis if they had initiated  
616 treatment and have at least one follow-up visit . A follow-up visit includes a contact where  
617 patient-reported outcomes or site-reported outcomes about patient status are collected.

618

619 5.1.3 Review of inclusion and exclusion criteria by the consenting clinician will be performed to  
620 ensure that patient's condition is stable and all criteria are correct. Patients consenting for the  
621 treatment trial will have data registered in the EDC and will be randomized via a secure Internet  
622 Web-based Randomization System (IWRS) in eSOCDAT according to the schema in Table 5-1.

623

## ACTIV-IV COVID-19 Outpatient Thrombosis Prevention Trial

Version: 5.7

624 5.1.4 For efficiency of drug distribution, participants will be supplied with investigational study  
 625 drug in child-proof bottles labeled “Bottle A-AM” and “Bottle B-PM” via overnight shipping  
 626 directly to addresses as confirmed by the subject (see section 9). The apixaban arms will have  
 627 active drug in the AM and PM bottles, the aspirin arm will have active drug in the AM bottle and  
 628 matching placebo in the PM bottle, and the placebo arm will have matching placebos in both the  
 629 AM bottle and in the PM bottle.

630 *Table 5-1 – Study Treatment arms*

631

| <b>Group</b> | <b>treatment</b> | <b>Dose AM</b> | <b>Dose PM</b> | <b>Duration</b> |
|--------------|------------------|----------------|----------------|-----------------|
| 1.           | Apixaban         | 2.5 mg         | 2.5 mg         | 45 days         |
| 2.           | Apixaban         | 5.0 mg         | 5.0 mg         | 45 days         |
| 3.           | aspirin          | 81 mg          | placebo        | 45 days         |
| 4.           | placebo          | Placebo        | placebo        | 45 days         |

632

633 *Figure 5-1 – Study flow and randomization*

634

635

636

## ACTIV-IV COVID-19 Outpatient Thrombosis Prevention Trial

Version: 5.7

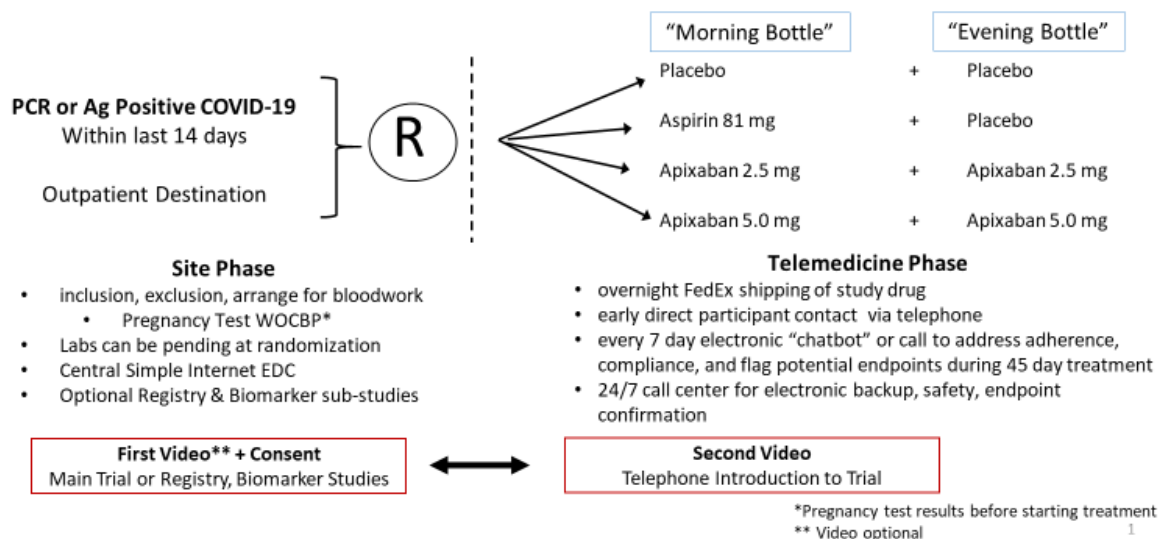

637

638

639

640 Study drug will be shipped over night to the participant as described in section 9 below. Subjects  
 641 will be contacted either electronically or by telephone within 24 hours of randomization to confirm  
 642 receipt of the study treatment. Receipt of study treatment will also be tracked using the shipping  
 643 courier’s tracking system. Detailed directions will be given to the subject at that time, with written  
 644 dose instructions accompanying study drug reinforced with electronic and verbal discussion by  
 645 central study staff. Information about the trial will also be provided on an insert for the patient to  
 646 give to their local healthcare provider. If there is documentation of delivery but no response from  
 647 the subject, study staff will contact the subject by telephone within 24 hours.

648 It is anticipated that subjects will start the assigned study treatment within 24-36 hours after  
 649 randomization. A modified intention-to-treat (mITT) approach will be used such that only  
 650 subjects who take at least one pill of study medication and have at least one follow-up visit. A  
 651 follow-up visit includes a contact where patient-reported outcomes or site-reported outcomes

## ACTIV-IV COVID-19 Outpatient Thrombosis Prevention Trial

Version: 5.7

652 about patient status are collected. will be included in the analysis, and trial follow up will begin at  
653 the time of treatment initiation

654 Subjects will be contacted (electronic or telephone) minimally weekly after initial start of study  
655 medication for 45 days with a following 30 day safety assessment at day 75 after starting study  
656 treatment.. Follow up electronic contact will be dependent on initial patient response, compliance  
657 with response, and medication adherence, for the trial duration using electronic contacts and  
658 through telephone contacts. Participants will be queried for any clinically relevant endpoints,  
659 especially major bleeding, or need to seek healthcare attention for any reason. Follow-up will  
660 occur from the time of study drug receipt and through the 30 day safety period.

661

## 662 **5.2 Duration of study participation**

663 For all enrolled subjects, treatment duration will be 45 days unless a primary, secondary, or safety  
664 outcome occurs before 45 days. The trial follow-up will continue for 45 days after treatment  
665 initiation, and there will an additional 30 day follow-up (i.e. through day 75) for the collection of  
666 safety outcomes .

667

## 668 **5.3 Primary study endpoint**

669 The primary endpoint will be a composite endpoint of symptomatic deep venous thrombosis,  
670 pulmonary embolism, arterial thromboembolism, myocardial infarction, ischemic stroke, need for  
671 hospitalization for cardiovascular/pulmonary events, and all-cause mortality for up to 45 days  
672 after initiation of assigned treatment.

673

## 674 **5.4 Secondary study endpoints**

675 Key secondary endpoints of treatment effects are the individual components of the primary  
676 composite i.e.:

- 677           ▪ Hospitalization for cardiovascular/pulmonary events
- 678           ▪ Death occurring without antecedent hospitalization



## ACTIV-IV COVID-19 Outpatient Thrombosis Prevention Trial

Version: 5.7

- 679                   ▪ Symptomatic DVT
- 680                   ▪ Pulmonary embolism
- 681                   ▪ Arterial thrombotic events including MI, ischemic stroke, other arterial
- 682                    thromboembolism
- 683                   ▪ All-cause mortality
- 684

685           The time-to-event for the composite primary endpoint up to 45-days will be considered a key  
686           secondary endpoint.

687

688           In addition, a clinical rank-based score will be created based on events occurring during the  
689           45-day treatment period. The score will incorporate the occurrence of efficacy and safety  
690           events. The following numeric rankings will be used to order patient outcomes from best  
691           (score=1) to worst (score =9):

- 692           1. No clinical event (i.e. no study endpoint, safety endpoint or urgent/emergent health care  
693            encounter)
- 694           2. Non-fatal bleeding that does not require an urgent care center visit, emergency room  
695            visit or a hospital admission
- 696           3. Non-fatal event that is one of the composite primary events that requires an urgent care  
697            center visit or emergency room visit but not a hospital admission (e.g. this includes a  
698            DVT or pulmonary embolism that do not result in a hospital admission)
- 699           4. Non-fatal hospitalization for bleeding event or cardiovascular/pulmonary event not  
700            including stroke, MI, pulmonary embolism or DVT.
- 701           5. Non-fatal hospitalization for DVT
- 702           6. Non-fatal hospitalization for PE
- 703           7. Non-fatal hospitalization for MI
- 704           8. Non-fatal hospitalization for stroke
- 705           9. Death

706

## ACTIV-IV COVID-19 Outpatient Thrombosis Prevention Trial

Version: 5.7

707 All trial efficacy analyses will include events that occur during the 45 day treatment period.

708

709

## 710 **5.5 Safety end points**

711 Safety endpoints to be evaluated throughout the 45 days of assigned treatment and  
712 during the additional 30 day follow up safety period will include:

- 713     ▪ Major bleeding (ISTH major bleeding)
  - 714         • Drop in hemoglobin of 2 gm/dl attributed to bleeding and
  - 715         • Requiring transfusion of 2 or more units
  - 716         • Bleeding in a critical site which includes hemorrhagic stroke and
  - 717             intracranial hemorrhage
  - 718         • Fatal bleeding

- 719     ▪ Mild bleeding (ISTH CRNMB)

720                     Non-major clinically relevant bleeding is defined as overt bleeding  
721                     not meeting the criteria for major bleeding but associated with  
722                     medical intervention, unscheduled contact (visit or telephone call)  
723                     with a physician, (temporary) cessation of study intervention, or  
724                     associated with discomfort for the participant such as pain or  
725                     impairment of activities of daily life.

726

- 727                     • Development of disseminated intravascular coagulation (DIC)

728

729 Safety analyses will include events that occur during the 45 day treatment period and the  
730 additional 30 day post-treatment period.

731

## 732 **5.6 Adjudication of events**

733 As this trial will be conducted in the outpatient setting with remote and telephone monitoring of  
734 patient and patient reporting of events and hospitalizations, patient reported events will be

## ACTIV-IV COVID-19 Outpatient Thrombosis Prevention Trial

Version: 5.7

735 investigated by the Coordinating Center, including obtaining source documentation information  
736 from healthcare facilities where patients received treatment. An independent central  
737 adjudication committee (ICAC) at Brigham and Women's Hospital will review and adjudicate  
738 events in a blinded manner without awareness of treatment allocation. During the study period  
739 the ICAC will adjudicate all suspected occurrences of the primary outcome composites. The  
740 ICAC will also adjudicate all suspected episodes of bleeding including hemorrhagic stroke and  
741 intracranial hemorrhage and categorize adjudicated bleeding as major or clinically relevant non-  
742 major. Bleeding events classified as minor by the RCC and confirmed by the Medical Monitor  
743 team to be minor will not be sent for adjudication. The ICAC will also adjudicate cause-specific  
744 hospitalization. The Committee will be provided with all relevant source documentation related  
745 to the events. The criteria and definitions of the study outcomes as well as the procedures  
746 followed by the ICAC will be described in an adjudication manual and endpoint charter.

747

## 748 **6 Study Population**

749

### 750 **6.1 Inclusion Criteria**

751 Stage 1 inclusion criteria are listed below. Age and biomarkers are used to select  
752 patients at higher risk of thrombosis for analysis. Per the adaptive trial design strategy, these  
753 criteria may change after the first and subsequent analyses of in-trial accrued data.

- 754 • Age between 40 and 80 years inclusive
- 755 • Documentation of PCR or antigen test positive symptomatic COVID-19 infection  
756 in the past 14 days
- 757 • ability to be contacted by telephone or other electronic methods of  
758 communication
- 759 • negative pregnancy test for WOCBP

760

## ACTIV-IV COVID-19 Outpatient Thrombosis Prevention Trial

Version: 5.7

761 **6.2 Exclusion Criteria**

762 Stage 1 exclusion criteria are listed below, subject to change based on adaptive trial  
763 design and analyses of in-trial accrued data.

- 764 • Indication for therapeutic anticoagulation (mechanical heart valve, AF, APS)
- 765 • Indication for single or dual antiplatelet therapy
- 766 • lactating
- 767 • primary brain tumor or acute leukemia
- 768 • bleeding risk:
  - 769 ▪ hospitalization in the past 2 months for:

770 bleeding due to ulcer or GI tract disease

771 major surgery, stroke, or intracranial hemorrhage

- 772 • platelet count < 100,000 per microliter can be obtained after randomization
- 773 • calculated creatine clearance < 30 ml/min can be obtained after randomization
- 774 • ever hospitalized after diagnosis of COVID-19
- 775 • concomitant need for strong inducers/inhibitors of p-gp and CYP3A4 (17:  
776 Appendix B)
- 777 • SARS-CoV-2 PCR or antigen test more than 14 days prior
- 778 • Unable to give written informed consent

779

780 See section 5.1.2 for management of laboratory test results

781

782 **6.3 Total Number of Participants**

783 Sample size calculations can be found in section 11 Statistical Considerations. Initial  
784 frequentist power calculations using conservative event rates from post hospital extended  
785 duration VTE trials in medically ill patients selected for increased risk suggest that roughly  
786 7000 patients will be required to show the superiority of apixaban to placebo, and the  
787 superiority of apixaban to aspirin. These numbers will be used for initial overarching

## ACTIV-IV COVID-19 Outpatient Thrombosis Prevention Trial

Version: 5.7

788 planning; however, to accommodate an adaptive design, sample size will not be pre-  
789 determined for any particular Stage after Stage 1 so that “in-flight” changes can be made.  
790 There will be interim monitoring to allow early stopping for futility, efficacy, or safety.

**791 6.4 Strategies for recruitment and retention**

792 The study investigators will adapt to the evolving landscape of the pandemic by leveraging the  
793 networks of networks already established within NIH including all 50 states and possible  
794 international locations. It is anticipated that there will be differences in timing of areas of the  
795 United States and the world that become hot-spots for COVID-19 illness over time, based on  
796 propagation patterns, local social distancing rules and compliance with those rules. Through the  
797 use of simple on-line and easily adapted EDC systems, sites will be activated when the local  
798 rate of new COVID-19 cases exceeds a threshold beyond which recruitment is feasible, and will  
799 place other sites on hold as needed when disease activity wanes in their geographic areas.

800 Screening and enrollment will occur in emergency departments or other appropriate outpatient  
801 urgent care settings or by review of positive test results from all types of testing facilities.

802 Screening of symptomatic patients will be performed by on-site or remote study staff for trial  
803 exclusion and inclusion criteria. Sites or remote study staff must be able to confirm SARS-CoV-  
804 2 test results within the past 14 days and have the ability to arrange for CBC, creatinine, D-  
805 dimer, and CRP tests prior to starting study drug treatment. Sites must have the ability to enroll  
806 minority participants who may preferentially use emergency department, other urgent care  
807 health facilities, or free standing testing facilities.

808

809

810

811

812

813

## ACTIV-IV COVID-19 Outpatient Thrombosis Prevention Trial

Version: 5.7

814 **7 Study Assessments and Procedures**815 **Error! Reference source not found.** presents the flow chart/time and assessment schedule

| Procedure                                                   | Screen:              | Baseline: | Randomize | Post randomize before starting drug | Treatment initiation * | Confirm all lab test results entered in EDC | Weekly follow up      | End of Treatment | End of Safety Period |
|-------------------------------------------------------------|----------------------|-----------|-----------|-------------------------------------|------------------------|---------------------------------------------|-----------------------|------------------|----------------------|
| Timeline                                                    | Day 14 through Day 0 |           | Day 0     |                                     | Day 1                  |                                             | Day 7, 14, 21, 28, 35 | Day 45           | Day 75               |
| <b>A. ED, URGENT CARE FACILITY</b>                          |                      |           |           |                                     |                        |                                             |                       |                  |                      |
| Medical history                                             | X                    | X         |           |                                     |                        |                                             |                       |                  |                      |
| Assess inclusion/exclusion                                  |                      | X         |           |                                     |                        |                                             |                       |                  |                      |
| SARS-Cov-2 result or in process                             |                      | X         |           |                                     |                        |                                             |                       |                  |                      |
| Informed consent                                            |                      | X         |           |                                     |                        |                                             |                       |                  |                      |
| Randomize                                                   |                      |           | X         |                                     |                        |                                             |                       |                  |                      |
| Laboratory tests 1                                          |                      | X         |           |                                     |                        | X                                           |                       |                  |                      |
| Platelet count result or in process                         |                      | X         |           |                                     |                        |                                             |                       |                  |                      |
| Calculated Cr/cl result or in process                       |                      | X         |           |                                     |                        |                                             |                       |                  |                      |
| hsCRP result or in process                                  |                      | X         |           |                                     |                        |                                             |                       |                  |                      |
| D-dimer result or in process                                |                      | X         |           |                                     |                        |                                             |                       |                  |                      |
| Pregnancy test result: must be known before starting drug   |                      | X         |           |                                     |                        |                                             |                       |                  |                      |
| <b>B. FREESTANDING TEST CENTER</b>                          |                      |           |           |                                     |                        |                                             |                       |                  |                      |
| Medical history                                             | X                    | X         |           |                                     |                        |                                             |                       |                  |                      |
| Assess inclusion/ exclusion                                 |                      | X         |           |                                     |                        |                                             |                       |                  |                      |
| SARS-CoV-2 result                                           | X                    |           |           |                                     |                        |                                             |                       |                  |                      |
| Informed consent                                            |                      |           | X         |                                     |                        |                                             |                       |                  |                      |
| Randomize                                                   |                      |           | X         |                                     |                        |                                             |                       |                  |                      |
| Laboratory tests 1                                          |                      |           |           | X                                   |                        | X                                           |                       |                  |                      |
| Platelet count result or in process                         |                      |           |           | X                                   |                        |                                             |                       |                  |                      |
| Calculated Cr/cl result or in process                       |                      |           |           | X                                   |                        |                                             |                       |                  |                      |
| hsCRP result or in process                                  |                      |           |           | X                                   |                        |                                             |                       |                  |                      |
| D-dimer result or in process                                |                      |           |           | X                                   |                        |                                             |                       |                  |                      |
| Pregnancy test results must be known before starting drug 2 |                      |           |           | X                                   |                        |                                             |                       |                  |                      |
| <b>ALL</b>                                                  |                      |           |           |                                     |                        |                                             |                       |                  |                      |
| Drug receipt                                                |                      |           |           | X                                   |                        |                                             |                       |                  |                      |
| Start study drug                                            |                      |           |           |                                     | X                      |                                             |                       |                  |                      |
| Assess adherence/compliance                                 |                      |           |           |                                     |                        |                                             | X                     | X                |                      |
| Event assessment                                            |                      |           |           |                                     | X                      |                                             | X                     | X                | X                    |

816 \*Day 1 is defined as date of starting treatment. The interval between day 0 and day 1 can be more than 1 calendar day

817 1. Study drug will be stopped if lab values outside acceptable values per protocol section XX

818 2. Urine or serum hCG test for pregnancy results be known before participant starts study treatment

## ACTIV-IV COVID-19 Outpatient Thrombosis Prevention Trial

Version: 5.7

819 **7.1 Study assessments**

820 Laboratory tests:

821 Patients will only be randomized after confirmation of SARS-Co-V2 positive results.

822 To allow for different enrollment pathways, laboratory tests can be done at different time  
823 points, either before or after randomization but prior to starting study treatment. Serum  
824 or urine pregnancy test results for WOCBP must be available prior to starting study  
825 treatment. Participants with platelet and creatinine test results not meeting eligibility  
826 criteria will be told to discontinue study medication if already started.

827 .

828 Post initiation of study medication assessments: Visits following informed consent in  
829 which SARS-CoV-2 testing and baseline labs are performed may be conducted using  
830 virtual technology and /or direct telephone contact. If electronic technology is used,  
831 contact will be escalated to direct telephone contact in any case where an unexpected  
832 problem occurs, a safety issue is reported, an endpoint is indicated, or any other  
833 relevant health-related event is reported.

834

835 Post-randomization study assessments will include 1) confirmation of drug receipt and drug  
836 administration instructions; 2) frequent (every 5-8 days) reporting of treatment adherence, safety  
837 issues, endpoint indications, or other relevant health-related events throughout the treatment  
838 period; and 3) frequent (every 5-8 days) reporting of safety issues, endpoint indications, or  
839 other relevant health-related events throughout the 30-day safety follow up period.

840

841 Confirmation of drug receipt, drug administration instructions, reporting of  
842 endpoints will be discussed with electronic and verbal confirmation with subjects. Medication  
843 adherence information will be collected by telephone or other electronic methods every 5-8

## ACTIV-IV COVID-19 Outpatient Thrombosis Prevention Trial

Version: 5.7

844 days after initial contact. Follow-up will utilize a combination of telephone calls and electronic  
845 mechanisms.

846

**847 8 Reasons for Withdrawal or Termination of study treatment****848 8.1 Occurrence of outcome events**

849 Subjects must discontinue treatment if meeting any of the composite endpoints of the primary  
850 outcome or safety outcomes as well as for hospitalization for any indication.

851

- 852           ▪ Hospitalization for cardiovascular/pulmonary events
- 853           ▪ Symptomatic DVT
- 854           ▪ PE
- 855           ▪ Arterial thrombotic events including MI, ischemic stroke, arterial
- 856            thromboembolism
- 857           ▪ Fatal event
- 858           ▪ Major bleeding
- 859           ▪ new indication for therapeutic anticoagulation or antiplatelet therapy

860

861 Trial follow-up and data collection extends through the end of the 75 day follow-up regardless of  
862 study drug discontinuation.

863 Contact with subjects will use multiple modalities including email, SMS text, and telephone.  
864 Details for the process for managing contact with patients not responding to these methods or  
865 those deemed lost to follow will be outlined in the Operations Manual.

**866 8.2 Voluntary Withdrawal**

867 Participants are free to withdraw from participation in the study at any time upon request.  
868 Participation in the study will be terminated if:



## ACTIV-IV COVID-19 Outpatient Thrombosis Prevention Trial

Version: 5.7

- 869       • Any clinical adverse event (AE), laboratory abnormality, or other medical condition or  
870       situation occurs such that continued participation in the study would not be in the best  
871       interest of the participant

872 The participant meets an exclusion criterion (either newly developed or not previously recognized)  
873 that precludes further study participation

### 874 **8.3 Premature Termination or Suspension of Study**

875 All deaths, SAE, and related critical events occurring within the 75 day study period will be  
876 reviewed by the DSMB. The decision to stop or suspend the study will be made the DSMB after  
877 considering the totality of the data and the benefit-risk of continuing the study and in accordance  
878 with the stopping rules defined in the DSMB charter.

879

880 This study may be temporarily suspended or prematurely terminated if there is sufficient  
881 reasonable cause.

882

883 Circumstances that may warrant termination or suspension of one arm or all arms of the trial  
884 include, but are not limited to:

- 885       • Determination of unexpected, significant, or unacceptable risk to participants in a strategy,  
886       such as excess mortality and major bleeding
- 887       • Demonstration of efficacy or lack thereof that would warrant stopping
- 888       • Insufficient compliance to protocol requirements
- 889       • Data that are not sufficiently complete and evaluable
- 890       • Determination of futility

891

892 Study may resume once concerns about safety, protocol compliance, data quality are addressed  
893 and to the satisfaction of satisfy the sponsor, the IRB and the FDA.

894

## ACTIV-IV COVID-19 Outpatient Thrombosis Prevention Trial

Version: 5.7

895 **9 STUDY AGENTS**896 **9.1 Study Agent Supply**

897 In Stage 1, Bristol Myers Squibb (BMS) will be responsible for provision of study drug and the  
898 blinded clinical trial labeling for all drug product including placebos, aspirin, apixaban, for this  
899 investigator sponsored trial. BMS quality will perform the appropriate GMP quality release  
900 before shipping the product to a central location to the investigator/sponsor. Bulk shipping of  
901 drug kits to the Brigham and Women's Hospital, for further distribution to the subjects will be  
902 performed per Good Distribution Practices and instructions for good receipt will be listed on the  
903 appropriate packing list.

904

905 Labelled study treatment packs will be stored at the Brigham and Women's Hospital. Individual  
906 participants study treatment, identified by a study randomization number assigned by the secure  
907 IWRS system will be shipped overnight using FED-EX from academic research offices at  
908 Brigham and Women's hospital in Boston to randomized participants. All study drug will be  
909 packaged in child-proof bottles within a tamper resistant box in keeping with a "low-touch"  
910 strategy to minimize patient study visits and to avoid unused study drug accruing at inactive  
911 sites. Once an eligible trial participant has been identified and provides informed consent, the  
912 EDC will generate a randomization code that in turn will allow trained BWH staff to select the  
913 correct small box containing treatment for that participant and place it inside of a FedEx  
914 container for next day delivery to the participant's home or place of living. The BWH staff will  
915 use the FedEx tracking software along with electronic and where needed telephone contact to  
916 ensure receipt of drug by the trial participant. Re-shipping may be done if participants confirm  
917 that the study drug is lost.

918

919 Follow up to ensure receipt of assigned study medication or placebo and review of  
920 administration instructions will be performed by either electronic or telephone contact within 24  
921 hours of patient receipt of the shipment. Trained study staff will be available for any problems

## ACTIV-IV COVID-19 Outpatient Thrombosis Prevention Trial

Version: 5.7

922 with drug delivery or drug questions. In any subsequent stages, alternative sourcing for novel  
923 agents and matching placebo will be required.

924

925 For simplicity and to increase adherence and compliance, each participant will receive two pill  
926 bottles, one labeled "Bottle A-AM" and one labeled "Bottle B-PM". Each bottle will contain 45  
927 tablets adequate for the duration of the trial. All drug will be overnight shipped to the participants  
928 home in the USA to avoid the need for hospital pharmacy interventions and to ensure that drug  
929 supply is distributed efficiently in a disease setting that is likely to undergo geographic change  
930 over time.

931

932 For those allocated to active apixaban 2.5 mg po bid, both the AM and PM bottle will contain  
933 active apixaban 2.5mg tablets.

934

935 For those allocated to active apixaban 5.0 mg po bid, both the AM and PM bottle will contain  
936 active apixaban 5.0 mg tablets.

937

938 For those allocated to active aspirin 81 mg po qd, the AM bottle will contain active aspirin 81 mg  
939 and the PM bottle will contain matching aspirin placebo.

940

941 Finally, for those allocated to placebo, the AM bottle will contain apixaban placebo and the PM  
942 bottle will contain apixaban placebo.

943

944 By so doing, all patients will be taking two daily pills that look and feel identical to each other.

945

## ACTIV-IV COVID-19 Outpatient Thrombosis Prevention Trial

Version: 5.7

946 **9.2 Indications for stopping assigned treatment**

947 The study team will instruct patients to stop study medications when any of the following occur:

- 948                   ▪ Any hospitalization
- 949                   ▪ Primary endpoint
- 950                   ▪ New indication for prophylactic or therapeutic anticoagulation
- 951                   ▪ New indication for antiplatelet therapy

952

953

954 **9.3 Interruption of study treatment.**

955

956 **9.3.1 Outpatient bleeding**

957 If participant experiences a bleeding event, the patient will be instructed to stop the study drug.

958 The participant will be instructed to contact the call center for instructions on appropriateness  
959 and timing of restarting therapy. Patients will be given written and video instructions (video 2) for  
960 when to call for minor symptoms of bleeding including any bleeding that takes more than 10  
961 minutes to stop, bleeding gums, bruising more than usual, a period that is heavier than usual, or  
962 nosebleeds.

963

964 **9.3.2 Need for unblinding**

965 When knowledge of the subject's randomized treatment assignment would have a meaningful  
966 impact on individual management, for example in cases of clinically significant bleeding or the  
967 need for urgent invasive procedures, the subject's treatment assignment should be stopped and  
968 unblinded which will be performed by BWH emergency care ACTIV-IV outpatient research  
969 assistants with 24/7 accessibility with access to EDC and with physician back up and support.  
970 This information will be provided to those who are caring for the subject and as few other people

## ACTIV-IV COVID-19 Outpatient Thrombosis Prevention Trial

Version: 5.7

971 as possible. In these cases, we will minimize bias by assuring that the clinical events committee  
972 remains blinded to treatment assignment, even if the treating clinician has been unblinded.

973

974 Every subject will be provided with an emergency care card in the study medications package.  
975 The will be instructed to bring this to any healthcare provider when they need to seek medical  
976 care. They will also be provided with a rubber bracelet with an emergency contact number that  
977 can be called in case of need for emergency car and/or unblinding of treatment. The alert card  
978 will:

- 979 • indicate that the subject is participating in a double-blind clinical trial
- 980 • note that the subject may be receiving either apixaban, aspirin, or placebo
- 981 • include the contact number to contact responsible trial staff to provide information  
982 to emergency medical personnel with unblinding information

983

984

985 **10 Adverse Events**986 **DEFINITIONS**987 **ADVERSE EVENTS**

988 An Adverse Event (AE) is defined as any new untoward medical occurrence or worsening of a  
989 preexisting medical condition in a clinical investigation participant administered study drug and  
990 that does not necessarily have a causal relationship with this treatment. An AE can therefore be  
991 any unfavorable and unintended sign (such as an abnormal laboratory finding), symptom, or  
992 disease temporally associated with the use of investigational product, whether or not considered  
993 related to the investigational product.

994 A ***non-serious adverse event*** is an AE not classified as serious. All reported non-serious AE  
995 will be collected and handled as described in Appendix F.

## ACTIV-IV COVID-19 Outpatient Thrombosis Prevention Trial

Version: 5.7

996 **SERIOUS ADVERSE EVENTS**997 A ***Serious Adverse Event (SAE)*** is any untoward medical occurrence that at any dose:

- 998 • results in death
- 999 • is life-threatening (defined as an event in which the participant was at risk of death at the  
1000 time of the event; it does not refer to an event which hypothetically might have caused  
1001 death if it were more severe)
- 1002 • requires inpatient hospitalization or causes prolongation of existing hospitalization
- 1003 • results in persistent or significant disability/incapacity
- 1004 • is a congenital anomaly/birth defect
- 1005 • is an important medical event (defined as a medical event(s) that may not be immediately  
1006 life-threatening or result in death or hospitalization but, based upon appropriate medical  
1007 and scientific judgment, may jeopardize the subject or may require intervention [eg,  
1008 medical, surgical] to prevent one of the other serious outcomes listed in the definition  
1009 above.) Examples of such events include, but are not limited to, intensive treatment in an  
1010 emergency room or at home for allergic bronchospasm; blood dyscrasias or convulsions  
1011 that do not result in hospitalization.)
- 1012 • Suspected transmission of an infectious agent (eg, pathogenic or nonpathogenic) via the  
1013 study drug is an SAE.
- 1014 • Although pregnancy and potential drug-induced liver injury (DILI) are not always serious  
1015 by regulatory definition, these events must be reported within the SAE reporting timeline.

1016

1017 Details of the adverse event collection and reporting process can be found in Appendix F.

1018 Participants will be queried at each study contact for new encounters with healthcare providers  
1019 including hospital visits or hospitalizations, and for unusual health conditions for which they  
1020 have not sought medical assistance. Participants who respond with new symptoms or who have

## ACTIV-IV COVID-19 Outpatient Thrombosis Prevention Trial

Version: 5.7

1021 seen a healthcare provider since last assessment will be called by the study Call Center.  
1022 Procedures for responding to these calls and collecting pertinent medical records will be  
1023 outlined in the Operations Manual.

1024

**1025 11 STATISTICAL CONSIDERATIONS****1026 11.1 Statistical and Analytical Plans (SAP)**

1027 A formal statistical analysis plan (SAP) will be created prior to the completion of the study and  
1028 before database lock. The SAP will include additional details about the statistical analyses,  
1029 including analysis of specified populations, plans for addressing missing data, and planned  
1030 sensitivity analyses. The pre-specified SAP will also address stratification of efficacy and safety  
1031 according to baseline levels of both D-dimer and CRP.

1032

**1033 11.2 Power and Sample Size Calculations**

1034 The primary efficacy analysis will be the comparison of frequency of the composite of  
1035 symptomatic deep venous thrombosis, pulmonary embolism, arterial thromboembolism,  
1036 myocardial infarction, ischemic stroke, need for hospitalization for cardiovascular/pulmonary  
1037 events, and all-cause mortality for up to 45 days among the four study groups using a modified  
1038 ITT approach. The primary safety analysis will be the comparison of ISTH major bleeding at 45  
1039 days between the four study groups. Additional safety analyses will be conducted after an  
1040 additional 30-day safety follow-up period and will include the full 75 days of follow-up.

1041 Subgroup analyses will focus on the evaluation of individual outcome events in each treatment  
1042 arm within groups defined by baseline D-dimer, hsCRP, and prespecified patient-level factors.

1043 In a retrospective sub-analysis of the Magellan trial which evaluated an enriched population of  
1044 high-risk cohort of medically-ill patients that included D-dimer level greater than 2 x ULN which  
1045 approximates the risk we expect in our COVID-19 cohort,<sup>20</sup> the outcome event rate was 5.1% in  
1046 the apixaban group and 7.9% in the placebo group. We therefore considered control group  
1047 primary outcome event rates ranging from 6% to 12% and assumed a one-sided superiority test

## ACTIV-IV COVID-19 Outpatient Thrombosis Prevention Trial

Version: 5.7

1048 for comparing the proportion of patients with an event in an active arm as compared to the  
1049 control arm using a simple chi-square statistic with  $\alpha=0.025$ . We determined the samples  
1050 sizes required to provide 80% and 90% power to detect a relative reduction of 33% in the 45-  
1051 day primary outcome event rates between two assigned treatment groups shown in the **Table**  
1052 below. Based on these estimates, we propose to enroll a total sample of N=7000 patients with  
1053 N=1750 patients assigned to each of the four treatment arms. Assuming a placebo event rate of  
1054 8.0%, a trial with N=1750 patients in each arm will have 80% power to detect superiority of  
1055 apixaban 5.0 mg to placebo when there is a 30% relative reduction in risk (i.e. 8.0% vs. 5.62%)  
1056 and 90% power with a 34% relative reduction (i.e. 8.0% vs. 5.28%). Assuming an event rate of  
1057 6.0% with aspirin, a trial with N=1750 patients in each arm will have 80% power to detect  
1058 superiority of apixaban 5.0 mg to aspirin when there is a 34% relative reduction in risk (i.e. 6.0%  
1059 vs. 3.94%) and 90% power with a 39% relative reduction (i.e. 6.0% vs. 3.65%). These event  
1060 rates are plausible based on the current literature. This pragmatic randomized clinical trial has  
1061 excellent power to detect clinically meaningful differences between the treatment arms with  
1062 respect to the 45-day composite outcome on both the absolute and the relative scales. This trial  
1063 will have limited power to detect small differences in the outcome rate.

1064



## ACTIV-IV COVID-19 Outpatient Thrombosis Prevention Trial

Version: 5.7

| <b>Table 11-1</b> - Estimated total sample size in 4 arms required to test one treatment group against control group with a one-sided superiority test and alpha=0.025. |                            |            |                 |                                 |                                 |
|-------------------------------------------------------------------------------------------------------------------------------------------------------------------------|----------------------------|------------|-----------------|---------------------------------|---------------------------------|
| Control Group Event Rate                                                                                                                                                | Treatment Group Event Rate | Risk Ratio | Risk Difference | Total Sample Size for 80% Power | Total Sample Size for 90% Power |
| 12.0%                                                                                                                                                                   | 8.0%                       | 0.667      | 4.0%            | 3520                            | 4708                            |
| 10.0%                                                                                                                                                                   | 6.67%                      | 0.667      | 3.33%           | 4312                            | 5772                            |
| 8.0%                                                                                                                                                                    | 5.33%                      | 0.667      | 2.67%           | 5464                            | 7316                            |
| 6.0%                                                                                                                                                                    | 4.0%                       | 0.667      | 2.0%            | 7444                            | 9964                            |

1065

1066

1067 **11.3 Primary Outcome Analysis**

1068

1069 The modified ITT principle will be used for the primary treatment comparisons of trial outcomes  
 1070 such that only subjects who initiate treatment and have at least one follow-up visit. A follow-up  
 1071 visit includes a contact where patient-reported outcomes or site-reported outcomes about  
 1072 patient status are collected. will be included in the analysis, and trial follow up will begin at the  
 1073 time of treatment initiation. For Stage 1, the primary endpoint, the composite of symptomatic  
 1074 deep venous thrombosis, pulmonary embolism, arterial thromboembolism, myocardial infarction,  
 1075 ischemic stroke, need for hospitalization for cardiovascular/pulmonary events, and all-cause  
 1076 mortality for up to 45 days after initiation of assigned treatment in the four treatment groups, will  
 1077 be modeled using a logistic regression model with treatment assignment as the independent  
 1078 variable and adjusting for trial stratification variables (i.e., country), and baseline risk factors  
 1079 including age, sex, race/ethnicity, D-dimer, and hsCRP, weight and calculated creatinine  
 1080 clearance. If the number of mITT patients with a primary endpoint event is low (<50 patients), a  
 1081 logistic regression model adjusting only for the trial stratification variables will be used as the  
 1082 primary model to assess the effect of assigned treatment. The placebo arm will serve as the  
 1083 “reference group” in this model, and the primary outcome analysis will involve testing whether  
 1084 the coefficient for each active treatment group relative to the reference placebo group is equal to  
 1085 0. For each of the designated treatment comparisons, a one-sided test for superiority will be  
 1086 used such that the type 1 error rate will be set to alpha=0.025. Other pairwise treatment

## ACTIV-IV COVID-19 Outpatient Thrombosis Prevention Trial

Version: 5.7

1087 comparisons will be conducted, and in addition, the effects of treatment of the combined  
1088 prophylactic and therapeutic doses of apixaban will be compared with placebo.

1089

1090 Unadjusted event rates for each treatment group, and pairwise relative risks and the absolute  
1091 risk differences with 95% confidence intervals will be calculated and presented.

1092

1093 If clinically meaningful imbalances in baseline risk factors are detected between two randomized  
1094 treatment groups, multivariable logistic regression will be used to adjust for these factors as a  
1095 sensitivity analysis.

1096

#### 1097 **11.4 Secondary Outcome Analyses**

1098

1099 The composite outcome evaluated will be tabulated, and broken down by component (e.g.,  
1100 death, pulmonary embolus, symptomatic DVT, myocardial infarction, etc.). Note that all clinical  
1101 endpoint events that occur during the 45-day treatment period will be collected regardless of  
1102 whether a patient discontinues therapy or experiences an initial clinical event. As a result, some  
1103 participants may experience more than one component of the primary endpoint. Event rates  
1104 and pairwise relative risks and the absolute risk difference between treatment groups will be  
1105 calculated with their 95% confidence intervals for each of the defined secondary endpoints. In  
1106 addition to the above, the effects of treatment in the outpatient setting of the combined  
1107 prophylactic and therapeutic doses of apixaban will be compared with placebo.

1108

1109 Kaplan-Meier cumulative incidence curves will be created for the primary composite endpoint up  
1110 to 45 days after treatment initiation, and log-rank statistics will be computed to compare the time  
1111 to event data among treatment groups. The 95% confidence interval for the estimated  
1112 cumulative event rate at 45 days will be determined for each treatment group. Pairwise  
1113 differences and 95% confidence intervals for differences will be computed. The combined  
1114 prophylactic and therapeutic doses of apixaban will be compared with placebo.

## ACTIV-IV COVID-19 Outpatient Thrombosis Prevention Trial

Version: 5.7

1115

1116 Kruskal-Wallis tests will be used to compare the distribution of the clinical rank-based score  
1117 (scores range from 1-9 with lower scores indicating better outcomes) among the assigned  
1118 treatment groups. Pairwise comparisons will be conducted to determine if one treatment has a  
1119 “better” outcome relative to another.

1120

**1121 11.5 Sub-group Analyses and Effect Modification**

1122

1123 A select number of subgroup analyses will be performed based on pre-specified baseline factors  
1124 that potentially modify the effect of treatment. These will include D-dimer , hsCRP , age (<60  
1125 years, ≥60 years), sex, race/ethnicity (white non-Hispanic, Black non-Hispanic, Hispanic, other),  
1126 and country. The rate of the 45-day primary composite outcome and the safety outcomes will be  
1127 compared by assigned treatment within pre-defined subgroups. We will assess whether there is  
1128 evidence that each subgroup variable modifies treatment effectiveness by creating a logistic  
1129 regression model including the subgroup variable, treatment assignment, and the interaction  
1130 between the subgroup variable and treatment assignment and evaluating the significance of the  
1131 interaction term. Models that evaluate whether continuous variables (d-dimer, CRP and age)  
1132 modify the assigned treatment effect on the primary endpoint will also be created.

1133

1134

**1135 11.6 Safety Analyses**

1136 We will compare the rate of ISTH major bleeding and the rate of ISTH clinically relevant non-  
1137 major bleeding (CRNMB)<sup>28</sup> during the 45-day treatment period and during the additional 30 day  
1138 safety follow up period between the groups assigned to apixaban 5.0 mg and apixaban 2.5 mg  
1139 relative to aspirin and relative to placebo alone. DIC will also be assessed at 45 days. The  
1140 proportion of patients in each assigned treatment group who experience each safety event, the  
1141 relative risk and the absolute risk difference will be calculated from the observed data, and 95%  
1142 confidence intervals will be calculated. Analyses of the bleeding outcomes that occur during the

## ACTIV-IV COVID-19 Outpatient Thrombosis Prevention Trial

Version: 5.7

1143 full 75-day follow-up period (i.e. 45 day treatment period plus the 30 day safety follow-up) will  
1144 also be conducted as part of the trial safety analyses.

1145

**1146 11.7 Adherence and Retention Analyses**

1147 Receipt of planned therapy will be recorded on electronic case report forms. The proportion of  
1148 patients evaluated with less than 45-days of follow-up (the primary outcome assessment time)  
1149 will be tabulated. Every effort will be made to recontact patients who are unreachable. Due to  
1150 the short timeline of trial participation we anticipate excellent patient retention. A thorough  
1151 evaluation of missing data patterns will be undertaken. Baseline characteristics of patients with  
1152 missing primary outcome data will be compared to those with complete data; factors associated  
1153 with missing primary outcome data will be identified using logistic regression. Missing follow-up  
1154 data will not be imputed for the analysis of the primary hypothesis unless critical issues are  
1155 identified.

1156

**1157 11.8 Baseline Descriptive Statistics**

1158 A limited number of demographic, clinical history, symptom, and biomarker variables will be  
1159 collected for each patient at baseline. The distribution of each variable will be examined and  
1160 transformations will be applied as needed. All variables will be summarized using mean,  
1161 median, standard deviation, and range (for continuous variables) and frequency (for categorical  
1162 variables). Baseline characteristics will be examined with respect to assigned treatment group  
1163 to verify randomization balance.

1164

**1165 11.9 Planned Interim Analysis**

1166 An independent data safety and monitoring board (DSMB) will review all interim analyses  
1167 prepared by an unblinded statistician. These analyses will be critical for driving that adaptive  
1168 changes made based on in-trial accrued data. Eligibility criteria, efficacy, and safety endpoints  
1169 will be analyzed based at predefined intervals to guide the design of subsequent stages to allow

## ACTIV-IV COVID-19 Outpatient Thrombosis Prevention Trial

Version: 5.7

1170 efficient use of data and resources to inform the adaptations in trial design. Please see  
1171 Appendix H for full details of the efficacy, futility, and safety monitoring plan for DSMB review.

1172 A Bayesian analytic approach is proposed for the interim monitoring plan in order to utilize prior  
1173 information when estimating the posterior probabilities in the sequential interim analyses. The  
1174 study team will work with the DSMB to define timing of the interim analyses and decisions rules  
1175 to test the relative effectiveness of each active treatment group as compared to the control  
1176 group with respect to the primary outcome based on the accruing data from appropriate  
1177 randomized patients. Initially, the placebo group will serve as the “control group”; however, if the  
1178 placebo arm is dropped and the trial continues, another treatment arm will be designated as the  
1179 control group for future treatment comparisons

1180 Decision rules will be established for efficacy based on the posterior probability that the active  
1181 treatment regimen is beneficial as compared to placebo with respect to the primary endpoint.  
1182 Assuming a non-informative prior distribution for each odds ratio at the first interim analysis, we  
1183 will calculate the posterior probability that an active treatment is superior to placebo. We will  
1184 update these posterior probabilities with new data at each subsequent interim analysis. If the  
1185 posterior probability exceeds the pre-specified threshold for superiority at any of the interim  
1186 analyses, the superior treatment will be declared efficacious and the other treatment may be  
1187 dropped. Prior to initiation of the first interim analysis, simulation studies will be conducted to  
1188 define the precise decision rules such that the resulting estimated type 1 error over the  
1189 expected number of looks approximates a one-sided  $\alpha=0.025$ . See Appendix H for more  
1190 details.

1191 Decision rules will also be developed for assessing futility of the active treatments based on  
1192 simulation studies. That is, the posterior probability that each of the active treatments is inferior  
1193 or equivalent to placebo with respect to the primary endpoint will be calculated assuming non-  
1194 informative priors at the outset of the trial. When the posterior probability exceeds a specified  
1195 threshold, futility will be established and the respective active therapy may be dropped from the  
1196 trial. See Appendix H for more details.

1197

## ACTIV-IV COVID-19 Outpatient Thrombosis Prevention Trial

Version: 5.7

1198 **11.10 Safety Review**

1199 We will monitor the rate of ISTH major bleeding and the rate of ISTH clinically relevant non-  
1200 major bleeding (CRNMB)<sup>28</sup> from accruing data on a regular and predetermined basis. We  
1201 anticipate that the rate of major bleeding will be very low. If there is evidence of excess bleeding  
1202 in the active arms, a new composite outcome including all of the events in the primary efficacy  
1203 outcome and the safety bleeding events will be considered and analyzed.

1204

1205 **11.11 Analyses Stratified by Baseline Levels of D-dimer and CRP**

1206 Beyond its primary aim, a major interest of the trial is to address the net benefit-to-risk ratio for  
1207 oral anticoagulation and oral antithrombotic therapy as compared to placebo across increasing  
1208 thresholds of D-dimer and across increasing thresholds of hsCRP. These analyses will be pre-  
1209 specified and are part of the overall trial design; should either net benefit or net risk relate to  
1210 baseline levels of D-dimer or hsCRP, the DSMB may suggest that different eligibility thresholds  
1211 be used for these biomarkers going forward.

1212

1213 The study will assess the overall event rate for the primary endpoint and the safety endpoint,  
1214 irrespective of assigned treatment group, by varying levels of D-dimer and CRP. The study  
1215 investigators, together with the DSMB, will make inferences based on these analyses of event  
1216 rates by biomarker level (without incorporating treatment assignment). The DSMB could  
1217 recommend that subgroups of low risk patients be excluded from the trial based on very low  
1218 observed primary endpoint event rates in the identified groups.

1219

1220 The DSMB will also evaluate the rates of the primary endpoint, secondary endpoints and the  
1221 safety endpoints by assigned treatment groups within pre-specified subgroups defined by D-  
1222 dimer level and CRP level.

1223

## ACTIV-IV COVID-19 Outpatient Thrombosis Prevention Trial

Version: 5.7

1224 **11.12 Analyses of Duration of Treatment**

1225 The optimal length of treatment is not well-understood in this clinical setting. Hence, we will  
1226 examine the timing of clinical thrombotic events and safety hemorrhagic events based on the  
1227 accruing data. Kaplan-Meier cumulative incidence curves will be created to assess the time to the  
1228 first thrombotic event and the time to the first hemorrhagic event, and Nelson-Aalen cumulative  
1229 hazard curves will be used to assess the cumulative number of events. If there is a strong  
1230 indication that benefits of a given treatment occur early and adverse events occur late in the 45  
1231 day treatment period, the DSMB may recommend that the relevant treatment arms be stopped  
1232 and replaced by treatment arms where the duration of therapy is shortened to 21 days.

1233

1234

1235 **12 Quality Assurance and Quality Control**

1236 QC procedures will be implemented beginning with the data entry system and data QC checks  
1237 that will be run on the database will be generated. Any missing data or data anomalies will be  
1238 assessed by the Coordinating Center and documentation required for clarification/resolution will  
1239 be obtained.

1240

1241 Following written SOPs, the monitors will verify that the clinical trial is conducted and data are  
1242 generated, documented (recorded), and reported in compliance with the protocol, GCP, and the  
1243 applicable regulatory requirements (e.g., Good Laboratory Practices (GLP), Good  
1244 Manufacturing Practices (GMP)).

1245

1246 The investigational site will provide direct access to all trial related sites, source  
1247 data/documents, and reports for the purpose of monitoring and auditing by the sponsor, and  
1248 inspection by local and regulatory authorities.

1249

## ACTIV-IV COVID-19 Outpatient Thrombosis Prevention Trial

Version: 5.7

1250 **13 Ethics/Protection of Human Subjects**1251 **13.1 Ethical Standard**

1252 The investigator will ensure that this study is conducted in full conformity with Regulations for  
1253 the Protection of Human Subjects of Research codified in 45 CFR Part 46, 21 CFR Part 50, 21  
1254 CFR Part 56, and the ICH E6.

1255

1256 **13.2 Institutional Review Board**

1257 The protocol, informed consent form(s), recruitment materials, and all participant materials will  
1258 be submitted to the IRB for review and approval. Approval of both the protocol and the consent  
1259 forms must be obtained before any participant is enrolled. Any amendment to the protocol will  
1260 require review and approval by the IRB before the changes are implemented to the study. All  
1261 changes to the consent forms will be IRB approved; a determination will be made regarding  
1262 whether previously consented participants need to be re-consented.

1263

1264 **13.3 Informed Consent Process**1265 **13.3.1 Consent and Other Informational Documents Provided to Participants**

1266 Consent forms describing in detail the study agent, study procedures, and risks are given to the  
1267 participant and documentation of informed consent is required prior to starting study treatments.

1268 Different pathways for identifying screen-eligible patients are described in section 5. Based on  
1269 the different approaches, in person or remote e-consent can be obtained. A copy will  
1270 Participants can consent to several trial components including the intervention trial, the biobank,  
1271 and/or if ultimately not eligible for the intervention trial or declines to participate, the patient  
1272 registry. For potential participants who have had previous positive SARS-CoV-2 test results,  
1273 site study personnel can contact the potential participant to discuss the trial by telephone, and if  
1274 participant is interested, arrange to obtain creatinine clearance, platelet count, D-dimer, CRP,



## ACTIV-IV COVID-19 Outpatient Thrombosis Prevention Trial

Version: 5.7

1275 screen for eligibility, and will follow consent and randomization procedures as in section 5, with  
1276 a copy of the consent form provided to the participant. t.

1277

1278 Consent for participating in the biobank sample collection and/or the registry will be as  
1279 described in section 5.1

1280

**1281 13.3.2 Consent Procedures and Documentation**

1282 Informed consent is a process that is initiated prior to the individual's agreeing to participate in  
1283 the study and continues throughout the individual's study participation. Informed consent will be  
1284 obtained following institutional COVID policy to protect study staff. Subjects will be given  
1285 information regarding participation in the trial using a combination of in-person and video  
1286 technology to describe the trial in layman's terms to the patient.

1287

1288 Additional consent for biobanking at sites participating in a biobank component can be obtained  
1289 with this consent form. Consent for participation in the registry study will also be obtained at this  
1290 time for patients who test positive for SARS-CoV-2 but do not meet eligibility criteria or decline  
1291 to participate in treatment.

1292

1293 As part of all consent forms, patients will give consent to provide all necessary and available  
1294 contact information to allow contact by telephone, SMS text, email, or other similar electronic  
1295 forms of communication.

1296

1297 Patients will have the ability to ask any questions that may arise with answers provided by both  
1298 onsite staff, call center staff, and by electronic formats. Participants will have the opportunity to  
1299 carefully review the written consent form and ask questions prior to signing. The participants  
1300 should have the opportunity to discuss the study with their family or friends or think about it

## ACTIV-IV COVID-19 Outpatient Thrombosis Prevention Trial

Version: 5.7

1301 prior to agreeing to participate. The participants may withdraw consent at any time throughout  
1302 the course of the trial. A copy of the signed informed consent document will be provided to  
1303 participants either with paper copy or electronically. The rights and welfare of the participants  
1304 will be protected by emphasizing to them that the quality of their medical care will not be  
1305 adversely affected if they decline to participate in this study.

1306

1307

1308

1309

1310

**1311 13.4 Posting of Clinical Trial Consent Form**

1312 The informed consent form will be posted on the Federal website after the clinical trial is closed  
1313 to recruitment, and no later than 60 days after the last study visit by any subject, as required by  
1314 the protocol.

1315

**1316 13.5 Participant and Data Confidentiality**

1317 Information about study participants will be kept confidential and managed according to the  
1318 requirements of the Health Insurance Portability and Accountability Act of 1996 (HIPAA). Those  
1319 regulations require a signed subject authorization informing the subject of the following:

1320

- 1321 • What protected health information (PHI) will be collected from participants in this  
1322 study
- 1323 • Who will have access to that information and why
- 1324 • Who will use or disclose that information

## ACTIV-IV COVID-19 Outpatient Thrombosis Prevention Trial

Version: 5.7

- 1325           •     The rights of a research subject to revoke their authorization for use of their PHI.

1326

1327     In the event that a subject revokes authorization to collect or use PHI, the investigator, by  
1328     regulation, retains the ability to use all information collected prior to the revocation of subject  
1329     authorization. For participants that have revoked authorization to collect or use PHI, attempts  
1330     should be made to obtain permission to collect at least vital status (i.e. that the subject is alive)  
1331     at the end of their scheduled study period.

1332

1333     Participant confidentiality is strictly held in trust by the participating investigators, their staff, and  
1334     the sponsor(s) and their agents. This confidentiality is extended to cover testing of biological  
1335     samples and genetic tests in addition to the clinical information relating to participants.  
1336     Therefore, the study protocol, documentation, data, and all other information generated will be  
1337     held in strict confidence. No information concerning the study or the data will be released to any  
1338     unauthorized third party without prior written approval of the sponsor.

1339

1340     The study monitor, other authorized representatives of the sponsor, representatives of the IRB  
1341     or pharmaceutical company supplying study product may inspect all documents and records  
1342     required to be maintained by the investigator, including but not limited to, medical records  
1343     (office, clinic, or hospital) and pharmacy records for the participants in this study. The clinical  
1344     study site will permit access to such records.

1345

1346     The study participant's contact information will be securely stored at each clinical site for internal  
1347     use during the study. At the end of the study, all records will continue to be kept in a secure  
1348     location for as long a period as dictated by local IRB and Institutional regulations.

1349

## ACTIV-IV COVID-19 Outpatient Thrombosis Prevention Trial

Version: 5.7

1350 Participant identifying information will be collected via electronic survey, and will be stored in  
1351 secure encrypted servers at the University of Pittsburgh. All data will be streamed via secure  
1352 API to the project clinical trial management system. Identifiers are required in both of these  
1353 locations to enable electronic outreach to participants for the purpose of self-reported data  
1354 collection. The participant's name, mobile phone number, address and contact information will  
1355 only be housed on a temporary basis to allow for direct to participant shipment of study drug  
1356 and for 75 day follow-up during the course of the trial. These data will be maintained until  
1357 database lock at the end of the trial, at which point they will be destroyed, unless the participant  
1358 has agreed to be included in the patient registry or be contacted for future research.

1359

1360 Study participant research data, which is for purposes of statistical analysis and scientific  
1361 reporting, will be transmitted to and stored at the University of Pittsburgh Data Coordinating  
1362 Center. This will not include the participant's contact or identifying information. Rather, individual  
1363 participants and their research data in the central database will be identified by a unique study  
1364 identification number. The study data entry and study management systems used by clinical  
1365 sites will be secured and password protected. At the end of the study, all study databases will  
1366 be de-identified and archived at the University of Pittsburgh Data Coordinating Center.

1367

**1368 14 Data Handling and Record Keeping****1369 14.1 Data Collection and Management Responsibilities**

1370

1371 Initial data collection is the responsibility of the clinical trial staff under the supervision of the site  
1372 PI. The investigator is responsible for ensuring the accuracy, completeness, legibility, and  
1373 timeliness of the data reported. Follow up data will be collected electronically from the  
1374 participant's self-report and by study staff via telephone. Responsibility for the accuracy,  
1375 completeness, and timeliness of data collected by telephone is under the supervision of the  
1376 Coordinating Center investigators who are responsible for ensuring the accuracy,  
1377 completeness, legibility, and timeliness of the data reported.

## ACTIV-IV COVID-19 Outpatient Thrombosis Prevention Trial

Version: 5.7

1378

1379 Copies of the electronic CRF (eCRF) will be provided for use as source documents and  
1380 maintained for recording data for each participant enrolled in the study. Data recorded in the  
1381 eCRF derived from source documents should be consistent with the source documents or the  
1382 discrepancies should be explained and captured in a progress note and maintained in the  
1383 Coordinating Center's official electronic study record.

1384

**1385 14.2 Study Records Retention**

1386 Study documents will be retained for the longer of 3 years after close-out, 5 years after final  
1387 reporting/publication, or 2 years after the last approval of a marketing application is approved for  
1388 the drug for the indication for which it is being investigated or 2 years after the investigation is  
1389 discontinued and FDA is notified if no application is to be filed or if the application has not been  
1390 approved for such indication. No records will be destroyed without the written consent of the  
1391 sponsor, if applicable. It is the responsibility of the sponsor to inform the investigator when these  
1392 documents no longer need to be retained.

1393

**1394 14.3 Protocol Deviations**

1395 A protocol deviation is any noncompliance with the clinical trial protocol, GCP, or Manual of  
1396 Procedures (MOP) requirements. The noncompliance may be either on the part of the  
1397 participant or enrolling site study staff. As a result of deviations, corrective actions are to be  
1398 developed and implemented promptly.

1399

1400 It is the responsibility of the Coordinating Center to use continuous vigilance to identify and  
1401 report deviations.

1402

## ACTIV-IV COVID-19 Outpatient Thrombosis Prevention Trial

Version: 5.7

1403 Protocol deviations must be reported to the PI and Trial Chair . The site PI/study staff is  
1404 responsible for knowing and adhering to their IRB requirements. Further details about the  
1405 handling of protocol deviations will be included in the MOP.

1406

**1407 14.4 Publication and Data Sharing Policy**

1408 This study will comply with the NIH Public Access Policy, which ensures that the public has  
1409 access to the published results of NIH funded research. It requires scientists to

1410 submit final peer-reviewed journal manuscripts that arise from NIH funds to the digital archive  
1411 PubMed Central upon acceptance for publication.

1412

1413 The International Committee of Medical Journal Editors (ICMJE) member journals have adopted  
1414 a clinical trials registration policy as a condition for publication. The ICMJE defines a clinical trial  
1415 as any research project that prospectively assigns human subjects to intervention or concurrent  
1416 comparison or control groups to study the cause-and-effect relationship between a medical  
1417 intervention and a health outcome. Medical interventions include drugs, surgical procedures,  
1418 devices, behavioral treatments,

1419 process-of-care changes, and the like. Health outcomes include any biomedical or health-  
1420 related measures obtained in patients or participants, including pharmacokinetic measures and  
1421 adverse events. The ICMJE policy, and the Section 801 of the Food and Drug Administration  
1422 Amendments Act of 2007, requires that all clinical trials be registered in a public trials registry  
1423 such as ClinicalTrials.gov, which is sponsored by the National Library of Medicine. Other  
1424 biomedical journals are considering adopting similar policies. For interventional clinical trials  
1425 performed under NIH IC grants and cooperative agreements, it is the grantee's responsibility to  
1426 register the trial in an acceptable registry, so the research results may be considered for  
1427 publication in ICMJE member journals. The ICMJE does not review specific studies to  
1428 determine whether registration is necessary; instead, the committee recommends that

## ACTIV-IV COVID-19 Outpatient Thrombosis Prevention Trial

Version: 5.7

1429 researchers who have questions about the need to register err on the side of registration or  
1430 consult the editorial office of the journal in which they wish to publish.

1431

1432 FDAAA mandates that a "responsible party" (i.e., the sponsor or designated principal  
1433 investigator) register and report results of certain "applicable clinical trials":

1434

- 1435 • Trials of Drugs and Biologics: Controlled, clinical investigations, other than Phase I  
1436 investigations of a product subject to FDA regulation;
- 1437 • Trials of Devices: Controlled trials with health outcomes of a product subject to FDA  
1438 regulation (other than small feasibility studies) and pediatric post-market surveillance  
1439 studies.
- 1440 • NIH grantees must take specific steps to ensure compliance with NIH implementation of  
1441 FDAAA.

1442

**1443 15 Study Finances****1444 15.1 Funding Source**

1445 NHLBI ACTIV-IV

1446

**1447 15.2 Costs to the Participant**

1448 Participant health insurance may be billed for the costs of medical care during this study since  
1449 these expenses would have happened even if you were not in the study, if their insurance does  
1450 not cover these costs or participants do not have insurance, these costs will be participant  
1451 responsibility.

1452

## ACTIV-IV COVID-19 Outpatient Thrombosis Prevention Trial

Version: 5.7

1453 **16 Conflict of Interest Policy**

1454 The independence of this study from any actual or perceived influence, such as by the  
1455 pharmaceutical industry, is critical. Therefore any actual conflict of interest of persons who have  
1456 a role in the design, conduct, analysis, publication, or any aspect of this trial will be disclosed  
1457 and managed. Furthermore, persons who have a perceived conflict of interest will be required to  
1458 have such conflicts managed in a way that is appropriate to their participation in the trial.

1459

1460 Any investigator who has a conflict of interest with this study (patent ownership, royalties, or  
1461 financial gain greater than the minimum allowable by their institution, etc.) must have the conflict  
1462 reviewed by the Conflict of Interest Management Unit (CIMU) with a Committee-sanctioned  
1463 conflict management plan that has been reviewed and approved by the study sponsor prior to  
1464 participation in this study. All investigators will follow the applicable conflict of interest policies.

1465



## ACTIV-IV COVID-19 Outpatient Thrombosis Prevention Trial

Version: 5.7

1466

1467 **17 REFERENCES**

1468

- 1469 1. Tang N, Li D, Wang X, Sun Z. Abnormal coagulation parameters are associated with poor  
1470 prognosis in patients with novel coronavirus pneumonia. *J Thromb Haemost* 2020.
- 1471 2. Chen N, Zhou M, Dong X, et al. Epidemiological and clinical characteristics of 99 cases of 2019  
1472 novel coronavirus pneumonia in Wuhan, China: a descriptive study. *Lancet* 2020;395:507-13.
- 1473 3. Wang D, Hu B, Hu C, et al. Clinical Characteristics of 138 Hospitalized Patients With 2019  
1474 Novel Coronavirus-Infected Pneumonia in Wuhan, China. *JAMA* 2020.
- 1475 4. Zhou F, Yu T, Du R, et al. Clinical course and risk factors for mortality of adult inpatients with  
1476 COVID-19 in Wuhan, China: a retrospective cohort study. *Lancet* 2020;395:1054-62.
- 1477 5. Guan WJ, Ni ZY, Hu Y, et al. Clinical Characteristics of Coronavirus Disease 2019 in China. *N*  
1478 *Engl J Med* 2020.
- 1479 6. Ranucci M, Ballotta A, Di Dedda U, et al. The procoagulant pattern of patients with COVID-19  
1480 acute respiratory distress syndrome. *J Thromb Haemost* 2020.
- 1481 7. Chen G, Wu D, Guo W, et al. Clinical and immunologic features in severe and moderate  
1482 Coronavirus Disease 2019. *J Clin Invest* 2020
- 1483 8. Varga Z, Flammer AJ, Steiger P, et al. Endothelial cell infection and endotheliitis in COVID-19.  
1484 *Lancet* 2020.
- 1485 9. Ackermann, Maximilian, Stijn E. Verleden, Mark Kuehnel, Axel Haverich, Tobias Welte, Florian  
1486 Laenger, Arno Vanstapel et al. Pulmonary vascular endothelialitis, thrombosis, and angiogenesis in  
1487 Covid-19. *New England Journal of Medicine* (2020).
- 1488 10. Manne BK, Denorme F, Middleton EA, Portier I, Rowley JW, Stubben CJ, Petrey AC, Tolley ND,  
1489 Guo L, Cody MJ, Weyrich AS. Platelet Gene Expression and Function in COVID-19 Patients. *Blood*. 2020  
1490 Jun 23.
- 1491 11. Klok FA, Kruip M, van der Meer NJM, et al. Incidence of thrombotic complications in critically  
1492 ill ICU patients with COVID-19. *Thromb Res* 2020.
- 1493 12. Poissy J, Goutay J, Caplan M, et al. Pulmonary Embolism in COVID-19 Patients: Awareness of  
1494 an Increased Prevalence. *Circulation* 2020.

## ACTIV-IV COVID-19 Outpatient Thrombosis Prevention Trial

Version: 5.7

- 1495 13. Middeldorp S, Coppens M, van Haaps TF, Foppen M, Vlaar AP, Müller MC, Bouman CC,  
1496 Beenen LF, Kootte RS, Heijmans J, Smits LP. Incidence of venous thromboembolism in hospitalized  
1497 patients with COVID-19. *Journal of Thrombosis and Haemostasis*. 2020 May 5.
- 1498 14. Helms J, Tacquard C, Severac F, Leonard-Lorant I, Ohana M, Delabranche X, Merdji H, Clere-  
1499 Jehl R, Schenck M, Gandet FF, Fafi-Kremer S. High risk of thrombosis in patients with severe SARS-  
1500 CoV-2 infection: a multicenter prospective cohort study. *Intensive care medicine*. 2020 May 4:1-0.
- 1501 15. Llitjos JF, Leclerc M, Chochois C, Monsallier JM, Ramakers M, Auvray M, Merouani K. High  
1502 incidence of venous thromboembolic events in anticoagulated severe COVID-19 patients. *Journal of*  
1503 *Thrombosis and Haemostasis*. 2020 Apr 22.
- 1504 16. Edler C, Schröder AS, Aepfelbacher M, Fitzek A, Heinemann A, Heinrich F, Klein A, Langenwalder  
1505 F, Lütgehetmann M, Meißner K, Püschel K. Dying with SARS-CoV-2 infection—an autopsy study of the  
1506 first consecutive 80 cases in Hamburg, Germany. *International Journal of Legal Medicine*. 2020 Jun 4.
- 1507
- 1508 17. Bompard F, Monnier H, Saab I, Tordjman M, Abdoul H, Fournier L, Sanchez O, Lorut C,  
1509 Chassagnon G, Revel MP. Pulmonary embolism in patients with Covid-19 pneumonia. *European*  
1510 *Respiratory Journal*. 2020 Jan 1.
- 1511 18. Gervaise A, Bouzad C, Peroux E, Helissey C. Acute pulmonary embolism in non-hospitalized  
1512 COVID-19 patients referred to CTPA by emergency department. *European Radiology*. 2020 Jun 9.
- 1513 19. Neo Poyiadi, Peter Cormier, Parth Y. Patel, Mohamad O. Hadied, Pallavi Bhargava, Kanika  
1514 Khanna, Jeffrey Nadig, Thomas Keimig, David Spizarny, Nicholas Reeser, Chad Klochko, Edward L.  
1515 Peterson, Thomas Song. **Acute Pulmonary Embolism and COVID-19**. *Radiology*, 2020
- 1516 20. Spyropoulos AC, Lipardi C, Xu J, Peluso C, Spiro TE, De Sanctis Y, Barnathan ES, Raskob GE.  
1517 Modified IMPROVE VTE risk score and elevated D-dimer identify a high venous thromboembolism risk in  
1518 acutely ill medical population for extended thromboprophylaxis. *TH Open*. 2020 Jan;4(01):e59-65.
- 1519 21. Agnelli G, Buller HR, Cohen A, Curto M, Gallus AS, Johnson M, Porcari A, Raskob GE, Weitz JI.  
1520 Apixaban for extended treatment of venous thromboembolism. *N Engl J Med*. 2013 Feb 21;368:699-708.
- 1521 22. Meschia JF, Bushnell C, Boden-Albala B, Braun LT, Bravata DM, Chaturvedi S, Creager MA,  
1522 Eckel RH, Elkind MS, Fornage M, Goldstein LB, Greenberg SM, Horvath SE, Iadecola C, Jauch EC,  
1523 Moore WS, Wilson JA, American Heart Association Ischemic stroke C, Council on C, Ischemic stroke N,  
1524 Council on Clinical C, Council on Functional G, Translational B and Council on H. Guidelines for the  
1525 primary prevention of ischemic stroke: a statement for healthcare professionals from the American Heart  
1526 Association/American Ischemic stroke Association. *Ischemic stroke*. 2014;45:3754-832.
- 1527 23. Gerhard-Herman MD, Gornik HL, Barrett C, Barshes NR, Corriere MA, Drachman DE, Fleisher  
1528 LA, Fowkes FGR, Hamburg NM, Kinlay S, Lookstein R, Misra S, Mureebe L, Olin JW, Patel RAG,

## ACTIV-IV COVID-19 Outpatient Thrombosis Prevention Trial

Version: 5.7

- 1529 Regensteiner JG, Schanzer A, Shishehbor MH, Stewart KJ, Treat-Jacobson D and Walsh ME. 2016  
1530 AHA/ACC Guideline on the Management of Patients With Lower Extremity Peripheral Artery Disease:  
1531 A Report of the American College of Cardiology/American Heart Association Task Force on Clinical  
1532 Practice Guidelines. *J Am Coll Cardiol*. 2017;69:e71-e126.
- 1533 24. Arnett DK, Khera A and Blumenthal RS. 2019 ACC/AHA Guideline on the Primary Prevention of  
1534 Cardiovascular Disease: Part 1, Lifestyle and Behavioral Factors. *JAMA Cardiol*. 2019.
- 1535 25. Becattini C, Agnelli G, Schenone A, Eichinger S, Bucherini E, Silingardi M, Bianchi M, Moia M,  
1536 Ageno W, Vandelli MR, Grandone E. Aspirin for preventing the recurrence of venous thromboembolism.  
1537 *New England Journal of Medicine*. 2012 May 24;366(21):1959-67.
- 1538 26. Brighton TA, Eikelboom JW, Mann K, Mister R, Gallus A, Ockelford P, Gibbs H, Hague W, Xavier  
1539 D, Diaz R, Kirby A. Low-dose aspirin for preventing recurrent venous thromboembolism. *N Engl J Med*.  
1540 2012 Nov 22;367:1979-87.
- 1541 27. Matharu GS et al. Clinical effectiveness and safety of aspirin for venous thromboembolism  
1542 prophylaxis after total hip and knee replacement: A systematic review and meta-analysis of randomized  
1543 clinical trials. *JAMA Intern Med* 2020 Feb 3.
- 1544 28. Kaatz S, Ahmad D, Spyropoulos AC, Schulman S, Subcommittee on Control of Anticoagulation.  
1545 Definition of clinically relevant non-major bleeding in studies of anticoagulants in atrial fibrillation and  
1546 venous thromboembolic disease in non-surgical patients: communication from the SSC of the ISTH.  
1547 *Journal of Thrombosis and Haemostasis*. 2015 Nov;13(11):2119-26.
- 1548

## ACTIV-IV COVID-19 Outpatient Thrombosis Prevention Trial

Version: 5.7

1549

1550 **18 Appendix A: Definition and Determination of Outcomes**

1551

1552 **18.1 Outcome definitions**

1553

1554 **Hospitalization for cardiovascular/pulmonary events due to COVID-19**

1555 Any hospitalization for cardiovascular/pulmonary events due to COVID-19 due to cardiac events  
1556 including ACS, MI, arterial thromboembolism, ischemic stroke, pulmonary events including  
1557 hypoxemia, hypoxemic respiratory failure, ARDS, VTE, or hemorrhagic events as defined in  
1558 greater detail below.

1559

1560 **Deep venous thrombosis**

1561 Deep venous thrombosis will be diagnosed by formal venous ultrasound or point-of-care  
1562 ultrasound (POCUS) performed by provider and documented in a note.

1563

1564 **Pulmonary embolism**

1565 Pulmonary embolism will be confirmed by chest CT with PE protocol or pulmonary angiography,  
1566 or deemed “highly-likely” by provider as evidenced by, for example, “clot in transit” on  
1567 echocardiogram or acute hemodynamic instability with acute right-ventricular dysfunction, for  
1568 which a clinician believes systemic anticoagulation and/or fibrinolytic is indicated.

1569

1570 **Presumed venous thromboembolism**

1571 COVID-19 has presented many clinical challenges including difficulty with obtaining diagnostic  
1572 imaging due to logistical issues such as patient travel when travel may be restricted at the local  
1573 level or due to concern for spread of COVID-19 to imaging personnel. The category of  
1574 presumed PE may be diagnosed when a patient presents with clinical signs and symptoms of  
1575 PE, not limited to dyspnea, cough, hypoxemia, tachycardia, appropriate EKG changes, or  
1576 evidence of right heart strain on echocardiogram, when chest CT or pulmonary angiography are  
1577 unable to be performed and therapeutic dose anticoagulation is prescribed by a physician.  
1578 Presumed deep vein thrombosis diagnosis may be made when a patient presents with a  
1579 swollen, painful, or discolored extremity, and the treating physician decides to initiate  
1580 therapeutic dose anticoagulation without obtaining imaging.

1581

1582 **Ischemic stroke/Arterial thromboembolism**

## ACTIV-IV COVID-19 Outpatient Thrombosis Prevention Trial

Version: 5.7

1583 Ischemic stroke or systemic embolism as diagnosed by imaging (i.e.: head CT, extremity CT  
1584 angiogram) or deemed “highly-likely” by provider based on physical examination (i.e., acute  
1585 hemiplegia thought to be due to ischemic stroke, acute extremity hypoperfusion).

1586

**1587 Myocardial infarction**

1588 Myocardial infarction is defined according to the universal definition of MI, which excludes  
1589 myocardial injury. MI must include rise and fall of cardiac troponin above the 99% with ECG  
1590 changes consistent with ischemia plus: new/ presumed new wall-motion abnormalities or other  
1591 imaging evidence of MI; potentially ischemic symptoms; and abnormal coronary angiography.  
1592 This diagnosis is made locally.

1593

**1594 ISTH Defined Major Bleeding**

1595 Bleeding that:

- 1596 1. Resulted in death,
- 1597 2. Occurred in a critical organ (intracranial, intraspinal, intraocular, retroperitoneal,  
1598 intraarticular, intramuscular with compartment syndrome, or pericardial), including  
1599 hemorrhagic stroke and intracranial hemorrhage, or
- 1600 3. Associated with either a decrease in the hemoglobin level of at least 2 g per deciliter or a  
1601 transfusion of at least 2 units of packed red cells

1602

**1603 Clinically Relevant Non-Major Bleeding**

1604 Bleeding that resulted in hospitalization, medical or surgical intervention for bleeding, an  
1605 unscheduled clinic visit, or a change in physician-directed antithrombotic therapy.

1606

**1607 Fatal Events**

1608

1609 Any death occurring during outpatient treatment or during hospitalization.

1610

1611

## ACTIV-IV COVID-19 Outpatient Thrombosis Prevention Trial

Version: 5.7

1612

1613

1614 **19 APPENDIX B Strong inducers/inhibitors of P-GP and CYP3A4**1615 See also <https://covid19-druginteractions.org/> for possible new COVID-19 treatments and apixaban

1616

1617

1618 **Strong inhibitors of both CYP3A4 and P-GP:**

1619 - atazanavir

1620 - boceprevir

1621 -

1622 - conivaptan

1623 - darunavir

1624 - darunavir/ritonavir

1625 -

1626 - indinavir

1627 - indinavir/ritonavir

1628 - itraconazole

1629 - ketoconazole

1630 - lopinavir/ritonavir

1631 - nelfinavir

1632 - nefazodone

1633 - posaconazole

1634 - ritonavir

1635 - saquinavir

1636 - telaprevir

1637 - telithromycin

## ACTIV-IV COVID-19 Outpatient Thrombosis Prevention Trial

Version: 5.7

1638 - voriconazole

1639

1640 **Strong inducers of both CYP3A4 and P-GP:**

1641

1642 - avasimibe

1643 - carbamazepine

1644 - fosphenytoin

1645 - phenytoin

1646 - phenobarbital

1647 - primidone

1648 - rifampicin

1649 - St John's wort

1650

1651

1652

1653

## ACTIV-IV COVID-19 Outpatient Thrombosis Prevention Trial

Version: 5.7

1654

1655

1656 **20 APPENDIX C: Requirements for Sites**

1657

1658

1659 Participants can be identified either in emergency departments or in appropriate healthcare  
1660 facilities capable of performing all required assessments and perform or confirm COVID-19 test  
1661 results. In addition to emergency department settings, these can include COVID-19 testing sites  
1662 within hospitals such as adjacent tents, urgent care centers, and similar medical care facilities  
1663 that have the ability to obtain CBC, creatinine, D-dimer, and CRP data at the time of COVID-19  
1664 testing or with verification of positive SARS-CoV-2 PCR or antigen test within the past 14 days,  
1665 pathway 5.1.1 A. Free standing test sites that identify positive patients can refer to central study  
1666 staff of the research call center who will be able to determine eligibility based on criteria as  
1667 described in section 6, Study Population, screen for the inclusion and exclusion criteria of the  
1668 trial, and perform assessments and laboratory values described in section 7, see pathway 5.1.1  
1669 B below. Hybrid models using a combination of steps for SARS-COV-2 testing, lab draws,  
1670 consent and randomization from both ED/urgent care and freestanding test center pathways  
1671 can be used as in 5.1.1 C. All participants must be able to have blood drawn for CBC,  
1672 creatinine, D-dimer, and hsCRP; this can be performed by home health clinician visits or clinical  
1673 facility and does not have to have been performed at the time of the initial SARS-CoV-2 test.  
1674 Test results do not have to be resulted prior to randomization but laboratory tests must be  
1675 drawn prior to starting study treatment. Serum or urine pregnancy test results in WOCBP need  
1676 to be known prior to starting study treatment.

1677

1678

1679 **21 Appendix D: Consent forms**

1680



## ACTIV-IV COVID-19 Outpatient Thrombosis Prevention Trial

Version: 5.7

1681 See attached

1682

1683 **22 Appendix E: definitions of covid-19 symptoms**

1684 CDC list of symptoms associated with COVID-19 link to website:

1685 <https://www.cdc.gov/coronavirus/2019-ncov/symptoms-testing/symptoms.html>

1686

1687

1688 **23 Appendix F: ADVERSE EVENT Collection and REPORTING INFORMATION**

1689

1690

1691 **NONSERIOUS ADVERSE EVENT**

- 1692 • Non-serious Adverse Events (AE) will be provided to BMS in aggregate via final study  
1693 reports a specified in the agreement or, if a regulatory requirement [eg, IND US trial] as  
1694 part of an annual reporting requirement.
- 1695 • Non-serious AE information will also be collected following the subject's written consent  
1696 to participate in the study.

1697 **Non-serious Adverse Event Collection and Reporting**

1698 The collection of non-serious AE information will begin following the subject's written consent to  
1699 participate in the study. All non-serious adverse events (not only those deemed to be treatment-  
1700 related) will be collected continuously during the 45 day treatment period and for a minimum of  
1701 30 days following the last dose of study treatment.

1702 Non-serious AEs should be followed to resolution or stabilization, or reported as SAEs if they  
1703 become serious. Follow-up is also required for non-serious AEs that cause interruption or  
1704 discontinuation of study drug and for those present at the end of study treatment as appropriate.

1705

1706

1707 **SERIOUS ADVERSE EVENT**

1708 The DCC/Medical Monitor must report study endpoints that are serious adverse events in  
1709 accordance with the protocol (21 CFR 312.64(b)). Because endpoints are specifically defined in  
1710 the protocol and collected on study case report forms, it is not required that they be submitted  
1711 on the serious adverse event case report form. The exception to this adverse events reporting

## ACTIV-IV COVID-19 Outpatient Thrombosis Prevention Trial

Version: 5.7

1712 requirement is when there is evidence suggesting a causal relationship between a drug and an  
 1713 event (e.g., death from anaphylaxis). In this case, the DCC/Medical Monitor must immediately  
 1714 report the event to the sponsor, even if the event is a component of the endpoint (e.g., all-cause  
 1715 mortality) (21 CFR 312.64(b)). “Safety endpoints,” as described in section V.A.3.a, are not  
 1716 considered “study endpoints” and, therefore, must be reported to the sponsor immediately (21  
 1717 CFR 312.64(b)).

1718

1719 • All Serious Adverse Events (SAEs) that occur following the subject’s written consent to  
 1720 participate in the study through 30 days of discontinuation of dosing must be reported to  
 1721 BMS Worldwide Safety, whether related or not related to study drug. If applicable, SAEs  
 1722 must be collected that relate to any later protocol-specified procedure (eg, a follow-up skin  
 1723 biopsy).

1724 • Following the subject’s written consent to participate in the study, all SAEs, whether  
 1725 related or not related to study drug, are collected, including those thought to be associated  
 1726 with protocol-specified procedures. The DCC/Medical Monitor should report any SAE  
 1727 occurring after these aforementioned time periods, which is believed to be related to study  
 1728 drug or protocol-specified procedure.

1729 • An SAE report should be completed for any event where doubt exists regarding its  
 1730 seriousness;

1731 • If the DCC/Medical Monitor believes that an SAE is not related to study drug, but is  
 1732 potentially related to the conditions of the study (such as withdrawal of previous therapy or  
 1733 a complication of a study procedure), the relationship should be specified in the narrative  
 1734 section of the SAE Report Form.

1735 An appropriate SAE form (e.g. ex-US = CIOMS form or USA = Medwatch form) should be used  
 1736 to report SAEs to BMS. If you prefer to use your own Institutional form, it must be reviewed by  
 1737 the BMS Protocol Manager prior to study initiation to ensure that at a minimum all of the data  
 1738 elements on the CIOMS form are present. Note: Please include the BMS Protocol number on  
 1739 the SAE form or on the cover sheet with the SAE form transmission.

1740 ✓ The CIOMS form is available at: <http://www.cioms.ch/index.php/cioms-form-i>

1741 ✓ The MedWatch form is available at: [MedWatch 3500 Form](#)

1742

## ACTIV-IV COVID-19 Outpatient Thrombosis Prevention Trial

Version: 5.7

- 1743       • The Sponsor will reconcile the clinical database AE cases (**case level only**) transmitted  
1744       to BMS Global Pharmacovigilance ([Worldwide.Safety@bms.com](mailto:Worldwide.Safety@bms.com)).
- 1745               ▪ The DCC/Medical Monitor will request from BMS GPV&E,  
1746               [aepbusinessprocess@bms.com](mailto:aepbusinessprocess@bms.com) the SAE reconciliation report and include  
1747               the BMS protocol number every 3 months and prior to data base lock or  
1748               final data summary
- 1749               ▪ GPV&E will send the DCC/Medical Monitor the report to verify and  
1750               confirm all SAEs have been transmitted to BMS GPV&E.
- 1751               ▪ The data elements listed on the GPV&E reconciliation report will be used  
1752               for case identification purposes. If the DCC/Medical Monitor determines a  
1753               case was not transmitted to BMS GPV&E, the case should be sent  
1754               immediately to BMS ([Worldwide.Safety@bms.com](mailto:Worldwide.Safety@bms.com)).
- 1755       • In addition to the Sponsor DCC/Medical Monitor 's responsibility to report events to their  
1756       local HA, suspected serious adverse reactions (whether expected or unexpected) shall be  
1757       reported by BMS to the relevant competent health authorities in all concerned countries  
1758       according to local regulations (either as expedited and/or in aggregate reports).
- 1759       • In accordance with local regulations, BMS will notify sponsor DCC/Medical Monitor of all  
1760       reported SAEs that are suspected (related to the investigational product) and unexpected  
1761       (ie, not previously described in the IB). An event meeting these criteria is termed a  
1762       Suspected, Unexpected Serious Adverse Reaction (SUSAR). Sponsor DCC/Medical  
1763       Monitor notification of these events will be in the form of either a SUSAR Report or a  
1764       Semi-Annual SUSAR Report.
- 1765               ✓ Other important findings which may be reported by BMS as an Expedited Safety  
1766               Report (ESR) include: increased frequency of a clinically significant expected SAE, an  
1767               SAE considered associated with study procedures that could modify the conduct of  
1768               the study, lack of efficacy that poses significant hazard to study subjects, clinically  
1769               significant safety finding from a nonclinical (eg, animal) study, important safety  
1770               recommendations from a study data monitoring committee, or sponsor or BMS  
1771               decision to end or temporarily halt a clinical study for safety reasons.
- 1772               ✓ Upon receiving an ESR from BMS, the DCC/Medical Monitor must review and retain  
1773               the ESR with the IB. Where required by local regulations or when there is a central  
1774               IRB/IEC for the study, the sponsor will submit the ESR to the appropriate IRB/IEC.  
1775               The DCC/Medical Monitor and IRB/IEC will determine if the informed consent  
1776               requires revision. The DCC/Medical Monitor should also comply with the IRB/IEC  
1777               procedures for reporting any other safety information.
- 1778
- 1779       SAEs, whether related or not related to study drug, and pregnancies must be reported to BMS  
1780       within 24 hours \ 1 Business Day of becoming aware of the event. SAEs must be recorded on  
1781       either CIOMS, MedWatch, or approved site SAE form.

## ACTIV-IV COVID-19 Outpatient Thrombosis Prevention Trial

Version: 5.7

1782 Pregnancies must be reported and submitted to BMS. BMS will perform due diligence follow-up  
1783 using the BMS Pregnancy Form which the investigator must complete.

1784 **SAE Email Address:** Worldwide.Safety@BMS.com

1785 **SAE Facsimile Number:** +1 609-818-3804

1786 If only limited information is initially available, follow-up reports are required. (Note: Follow-up  
1787 SAE reports should include the same DCC/Medical Monitor term(s) initially reported.)

1788 If an ongoing SAE changes in its intensity or relationship to study drug or if new information  
1789 becomes available, a follow-up SAE report should be sent within 24 hours \ 1 Business Day to  
1790 BMS using the same procedure used for transmitting the initial SAE report.

1791 All SAEs should be followed to resolution or stabilization.

1792 The causal relationship to study drug is determined by a physician and should be used to  
1793 assess all adverse events (AE). The causal relationship can be one of the following:

1794 Related: There is a reasonable causal relationship between study drug administration and the  
1795 AE.

1796 Not related: There is not a reasonable causal relationship between study drug administration  
1797 and the AE.

1798 The term "reasonable causal relationship" means there is evidence to suggest a causal  
1799 relationship.

1800 Adverse events can be spontaneously reported or elicited during open-ended questioning,  
1801 examination, or evaluation of a subject. (In order to prevent reporting bias, subjects should not  
1802 be questioned regarding the specific occurrence of one or more AEs.)

1803

#### 1804 **Laboratory Test Abnormalities**

1805 All laboratory test results captured as part of the study should be recorded following institutional  
1806 procedures. Test results that constitute SAEs should be documented and reported to BMS as  
1807 such.

1808 The following laboratory abnormalities should be documented and reported appropriately:

- 1809
- any laboratory test result that is clinically significant or meets the definition of an SAE

## ACTIV-IV COVID-19 Outpatient Thrombosis Prevention Trial

Version: 5.7

1810 • any laboratory abnormality that required the participant to have study drug discontinued or  
1811 interrupted

1812 • any laboratory abnormality that required the subject to receive specific corrective therapy.

1813 It is expected that wherever possible, the clinical rather than laboratory term would be used by  
1814 the reporting investigator (eg, anemia versus low hemoglobin value).

1815

**1816 Pregnancy**

1817 If, following initiation of the investigational product, it is subsequently discovered that a study  
1818 participant is pregnant or may have been pregnant at the time of investigational product  
1819 exposure, including during at least 5 half-lives after product administration, the investigational  
1820 product will be permanently discontinued in an appropriate manner (eg, dose tapering if  
1821 necessary for participant).

1822 The DCC/Medical Monitor must immediately notify [Worldwide.Safety@bms.com](mailto:Worldwide.Safety@bms.com) of this event  
1823 and complete one of the following forms within 24 hours of awareness of the event via either the  
1824 CIOMS, MedWatch or appropriate Pregnancy Surveillance Form in accordance with SAE  
1825 reporting procedures.

1826 Protocol-required procedures for study discontinuation and follow-up must be performed on the  
1827 participant.

1828 Follow-up information regarding the course of the pregnancy, including perinatal and neonatal  
1829 outcome and, where applicable, offspring information must be reported on the CIOMS,  
1830 MedWatch, BMS Pregnancy Surveillance Form, or approved site SAE form. A BMS Pregnancy  
1831 Surveillance Form may be provided upon request.

1832 Any pregnancy that occurs in a female partner of a male study participant should be reported to  
1833 BMS. Information on this pregnancy will be collected on the Pregnancy Surveillance Form. In  
1834 order for Sponsor or designee to collect any pregnancy surveillance information from the female  
1835 partner, the female partner must sign an informed consent form for disclosure of this  
1836 information.

**1837 Other Safety Considerations**

1838 Any significant worsening noted during interim or final physical examinations,  
1839 electrocardiograms, X-rays, and any other potential safety assessments, whether or not these  
1840 procedures are required by the protocol, should also be recorded as a non-serious or serious  
1841 AE, as appropriate, and reported accordingly.

1842

1843

## ACTIV-IV COVID-19 Outpatient Thrombosis Prevention Trial

Version: 5.7

1844 24 Appendix G: **Call Center Structure**

1845 Located at the University of Illinois at Chicago (UIC), the ACTIV-4 Call Center is a unit within the  
1846 Population Health Sciences Program.

1847 The Call center will employ the Five9 telephony system. The Call Center will record all  
1848 telephone calls, and store this information in HIPAA-compliant folders at UIC for training and QC  
1849 activities. The recorded calls will serve as “source documents” for Call Center activities, and will  
1850 be available to authorized study personnel collaborating in the ACTIV-4 network of networks.  
1851 The Call Center is staffed by bi-lingual (English and Spanish) and bicultural agents. Additional  
1852 Call Center agents can be added to meet the needs of the ACTIV-4 studies (other languages,  
1853 time zones, other countries). Call center agents do not need to be co-located, which is an  
1854 advantage during COVID-19 pandemic precautions, and provides the Call Center an opportunity  
1855 to scale its operations to support multiple studies. Training for additional Call Center agents will  
1856 be provided by UIC, including agents who are employees at other universities. Call Center  
1857 agents will access the eSOCDAT electronic data capture (EDC) system for data entry.

1858

1859 25 Appendix H: **Monitoring plan for efficacy, futility and safety in the Outpatient Trial for**  
1860 **DSMB review**

1861

1862 **1. Monitoring of Effectiveness Outcomes**

1863 The primary aim of the COVID-19 Outpatient trial is to compare the effects of treatment in  
1864 COVID-19 patients not requiring hospitalization at time of diagnosis (WHO COVID-19 ordinal  
1865 score 1-3) with (i) anticoagulation at prophylactic doses; with (ii) anticoagulation at therapeutic  
1866 doses; with (iii) antiplatelet therapy; and with (iv) placebo relative to each other on the primary  
1867 composite endpoint of symptomatic deep venous thrombosis, pulmonary embolism, arterial  
1868 thromboembolism, myocardial infarction, ischemic stroke, need for hospitalization for  
1869 cardiovascular/pulmonary events, and all-cause mortality for up to 45 days after initiation of  
1870 assigned treatment among the study population of non-hospitalized COVID-19 patients aged  $\geq$   
1871 40 years.

## ACTIV-IV COVID-19 Outpatient Thrombosis Prevention Trial

Version: 5.7

1872 The trial primary, secondary and safety outcomes are listed below.

1873 Primary outcome: a composite endpoint of symptomatic deep venous thrombosis, pulmonary  
1874 embolism, arterial thromboembolism, myocardial infarction, ischemic stroke, need for  
1875 hospitalization for cardiovascular/pulmonary events, and all-cause mortality up to 45 days after  
1876 initiation of assigned treatment.

1877 Secondary outcomes: (at 45 days):

- 1878 1. Hospitalization for cardiovascular/pulmonary events
- 1879 2. Death occurring without antecedent hospitalization
- 1880 3. Symptomatic DVT
- 1881 4. Pulmonary embolism
- 1882 5. Arterial thrombotic events including MI, ischemic stroke, other arterial  
1883 thromboembolism
- 1884 6. All-cause mortality
- 1885 7. Time-to-event for the composite endpoint
- 1886 8. Clinical rank-based score

1887

1888 Safety outcomes: (at 45 days and at 75 days)

- 1889 1. Severe bleeding (ISTH major bleeding)
- 1890 2. Mild bleeding (ISTH CRNMB)
- 1891 3. Development of DIC

1892 Clinical event rates for the primary, secondary and safety outcomes will be used to monitor  
1893 potential benefit or harm of treatment strategies for patients with COVID-19. The DSMB will  
1894 conduct a systematic evaluation of all trial outcomes for the overall trial cohort and stratified by  
1895 assigned treatment group at established regular intervals.

1896

1897 Sequential interim monitoring of the assigned treatment comparison with formal decision rules  
1898 will be used for efficacy and futility. Decision rules for efficacy of active drug versus placebo will

## ACTIV-IV COVID-19 Outpatient Thrombosis Prevention Trial

Version: 5.7

1899 be conducted such that the overall type I error is maintained at the pre-specified level of  
1900  $\alpha=0.025$  for the one-sided test. Formal interim futility analyses will be conducted to assess  
1901 the likelihood that each of the active treatments is inferior or equivalent to placebo with respect  
1902 to the primary endpoint. Initially, the placebo group will serve as the “control group”; however, if  
1903 the placebo arm is dropped and the trial continues, the aspirin treatment arm will be designated  
1904 as the control group for future treatment comparisons. Safety data will be presented and  
1905 analyzed at each meeting, but no formal decision rules will be established a priori for safety.  
1906 Data will be presented so that the DSMB can evaluate the net risk benefit ratio for each  
1907 treatment. Detailed information about the observed rate of enrollment over time will be  
1908 presented to the DSMB on a quarterly basis. Using the observed enrollment rates and trends,  
1909 we will project future sample sizes and estimate the power to detect superiority and/or futility at  
1910 set intervals.

1911 We estimate that the primary endpoint event rate in the placebo group will be 8%. Since we  
1912 hypothesize that the active treatments will be beneficial, we estimate that the overall primary  
1913 endpoint event rate in the trial (i.e. all treatment groups combined) will be this population is  
1914 approximately 7.0%. We also estimate the overall bleeding event rate will be approximately  
1915 1.0%. With a total of  $N=7000$  patients, we therefore assume that we will observe approximately  
1916 490 patients with primary endpoint events and 70 with bleeding events.

**1917 2. Formal Statistical Interim Monitoring for Efficacy: Superiority**

1918 Unadjusted event rates for each treatment group, and pairwise relative risks and the absolute  
1919 risk differences with 95% confidence intervals will be calculated and presented. In addition, the  
1920 effects of treatment in the outpatient setting of the combined prophylactic and therapeutic doses  
1921 of apixaban will be compared with placebo. A logistic regression model will be created for the  
1922 primary composite endpoint such that the effect of each active treatment group (relative to the  
1923 placebo reference group) will be estimated adjusting for country, age, sex, race/ethnicity, D-  
1924 dimer, and hsCRP, weight and calculated creatinine clearance. If the number of mITT patients  
1925 with a primary endpoint event is low ( $<50$  patients), a logistic regression model adjusting only for  
1926 the trial stratification variables will be used as the primary model to assess the effect of  
1927 assigned treatment. The primary analyses for efficacy will be based on the odds ratios,



## ACTIV-IV COVID-19 Outpatient Thrombosis Prevention Trial

Version: 5.7

1928 comparing one treatment to another, derived from this model. One treatment is beneficial  
 1929 compared to another if the [ Odds Ratio < 1.00 ] for the primary composite outcome. Assuming  
 1930 non-informative priors at the first look, we will calculate the posterior probabilities that the [ Odds  
 1931 Ratio < 1.00 ] for each active treatment compared to placebo. If at any analysis time-point, the  
 1932 upper bound of the lower 99% credible interval for the odds ratio is less than 1.00, the active  
 1933 treatment arm will be considered superior.

1934 ***Thus, the decision rule for superiority is:***

- 1935 • ***Posterior Probability [ OR (active vs placebo for the primary endpoint) < 1.00 ] ≥***  
 1936 ***0.99***

1937 Based on preliminary simulations, this threshold corresponds to a type 1 error rate that  
 1938 approximates 0.025 for a one-sided test, accounting for multiple looks. Simulations using a  
 1939 variety of assumptions will be conducted before the first interim look is initiated in order to verify  
 1940 the appropriateness of the proposed superiority threshold for this trial, and modifications to the  
 1941 decision rule may be made based on the simulation results.

1942 The DSMB will use this information to make a recommendation to the NHLBI. The DSMB can  
 1943 recommend that the Outpatient COVID-19 trial should continue as proposed, that one treatment  
 1944 arm may be dropped, that the trial protocol should be modified, or that the Outpatient COVID-19  
 1945 trial should be terminated early. The final decision to stop trial rests with the NHLBI.

### 1946 **3. Formal Statistical Interim Monitoring for Efficacy: Futility**

1947 We will consider dropping an arm of the trial when an active treatment is found to be “no  
 1948 different from” or “inferior to” placebo. Using the same logistic regression model that will be  
 1949 used for the primary analyses for superiority, we will determine the posterior probability that the  
 1950 active arm is equivalent or inferior to placebo. Given that the trial is powered to detect a relative  
 1951 risk reduction of 33% with active treatment, futility will be defined for an active arm if the lower  
 1952 bound of the upper 95% credible interval for the odds ratio comparing the active arm to placebo  
 1953 is greater than 0.75.

1954 ***Thus, the decision rule for futility is:***

- 1955 • ***Posterior Probability [ OR (active vs placebo for the primary endpoint) > 0.75 ] ≥ 0.95***

## ACTIV-IV COVID-19 Outpatient Thrombosis Prevention Trial

Version: 5.7

1956 This roughly corresponds to the having an estimated Odds Ratio that is 1.00 (or greater) and  
1957 the two-sided 90% confidence interval extends from 0.75 to 1.33 (or greater).

1958 When the posterior probability exceeds this specified threshold, futility will be established and  
1959 the respective active therapy may be dropped from the trial. The DSMB will use this information  
1960 to determine its recommendation to NHLBI, and the NHLBI will make the final decision.

#### 1961 **4. Monitoring Safety**

1962 Unadjusted event rates for each assigned treatment group, and pairwise relative risks and the  
1963 absolute risk differences with 95% confidence intervals will be calculated and presented for  
1964 each of the specified safety outcomes. In addition, a logistic regression model will be created  
1965 for each safety endpoint such that the effect of each active treatment group (relative to the  
1966 placebo reference group) will be estimated and the odds ratios, comparing one treatment to  
1967 another, will be derived from this model. We will not create explicit decision rules based on the  
1968 bleeding posterior probability.

1969 Prior studies suggest that bleeding safety event rates in this population are likely to be very low  
1970 (approximately 1.0%). If safety issues arise, the DSMB will use their clinical judgement to  
1971 assess the potential risks relative to the potential benefits for each active drug compared to  
1972 control. The DSMB may also examine the safety and efficacy data in subgroups known to be  
1973 high risk for bleeding such as those with older age and/or higher BMI.

1974 The DSMB will use the monitoring information to determine its recommendation to NHLBI. The  
1975 DSMB can recommend that the Outpatient COVID-19 trial should continue as proposed, that  
1976 one treatment arm may be dropped, that the trial protocol should be modified, or that the  
1977 Outpatient COVID-19 trial should be terminated early for safety reasons.

#### 1978 **5. Subgroup Analyses and Effect Modification**

1979 A select number of subgroup variables have been specified a priori:

- 1980 • Quartiles of D-dimer and CRP based on the data
- 1981 • age (<60 years, ≥60 years)
- 1982 • sex

## ACTIV-IV COVID-19 Outpatient Thrombosis Prevention Trial

Version: 5.7

- 1983 • race/ethnicity (white non-Hispanic, Black non-Hispanic, Hispanic, other)
- 1984 • country, if applicable.

1985 The rate of the primary composite outcome and the rate of the safety outcomes with 95%  
 1986 confidence intervals will be compared by assigned treatment within these pre-defined subgroups.  
 1987 We will assess whether there is evidence that each subgroup variable modifies treatment  
 1988 effectiveness by creating a logistic regression model including the subgroup variable, treatment  
 1989 assignment, and the interaction between the subgroup variable and treatment assignment. The  
 1990 significance of the interaction term will be presented. Additional subgroups may be examined  
 1991 based on data from the trial or information from external sources.

1992 Data will also be presented based on D-dimer and CRP level. In particular, we will examine the  
 1993 distribution of baseline D-dimer and by CRP levels, and we will analyze the overall event rates  
 1994 for the primary endpoint and the safety endpoints, irrespective of assigned treatment group, in  
 1995 each pre-specified subgroup defined by D-dimer and by CRP. If the overall primary endpoint  
 1996 event rates are exceedingly low in the low D-dimer or CRP subgroups, the DSMB may consider  
 1997 adding eligibility criteria to exclude these groups from the trial. Additional analyses will be  
 1998 undertaken to identify appropriate cut-points for defining low and high risk patient subgroups  
 1999 based on D-dimer and CRP levels. These analyses will include the examination of ROC curves  
 2000 from logistic regression models for the primary endpoint (and for safety endpoints) by  
 2001 continuous D-dimer level or CRP level and the examination of LOESS curves for the logit of the  
 2002 primary endpoint (and for the safety endpoint) by continuous D-dimer level or CRP level. The  
 2003 study investigators, together with the DSMB, will make inferences based on these analyses of  
 2004 event rates by biomarker level without incorporating treatment assignment. Only the DSMB is  
 2005 permitted to examine outcomes by assigned treatment group. As noted, the DSMB will evaluate  
 2006 the rates of the primary endpoint, secondary endpoints, and the safety endpoints by assigned  
 2007 treatment groups within pre-specified subgroups defined by D-dimer level and CRP level.

## 2008 **6. Duration of Treatment**

2009 Kaplan-Meier cumulative incidence curves will be created to assess the time to the first primary  
 2010 endpoint event and the time to the first safety event, and Nelson-Aalen cumulative hazard

## ACTIV-IV COVID-19 Outpatient Thrombosis Prevention Trial

Version: 5.7

2011 curves will be used to assess the cumulative number of events, irrespective of treatment  
2012 assignment. Assuming that bleeding events occur at a fairly constant rate over time, we  
2013 suggest that if  $\geq 90\%$  of the primary endpoint events occur in the first 21 days, then the DSMB  
2014 will consider modifying the treatment arms such that the duration of therapy is shortened to 21  
2015 days. Curves stratified by treatment group may be examined before finalizing a  
2016 recommendation.

2017

2018

ACTIV-IV COVID-19 Outpatient Thrombosis Prevention Trial

Version: 5.7

2019
