# Supplementary material
Source: PubMed Central journal article supplement (PMC8506296)
Supplement: jama-e2117272-s002.pdf [file jama-e2117272-s002.pdf]

1  
2  
3  
4  
5  
6  
7  
8  
9  
10  
11  
12  
13  
14  
15  
16

**STATISTICAL ANALYSIS PLAN**

**for**

**ACTIV-4B: COVID-19 Outpatient Thrombosis Prevention Trial**

**A multicenter adaptive randomized placebo-controlled platform trial evaluating the efficacy and safety of antithrombotic strategies in COVID-19 adults not requiring hospitalization at time of diagnosis**

**May 31, 2021**

## 1 PRIMARY AND SECONDARY AIMS OF THE TRIAL

The **primary aim** of the trial is to compare the effects of treatment with (i) anticoagulation at prophylactic doses; (ii) anticoagulation at therapeutic doses; (iii) antiplatelet therapy; and (iv) placebo relative to each other on the primary composite endpoint of symptomatic deep venous thrombosis, pulmonary embolism, arterial thromboembolism, myocardial infarction, ischemic stroke, need for hospitalization for cardiovascular/pulmonary events, and all-cause mortality for up to 45 days after initiation of assigned treatment among COVID-19 patients not requiring hospitalization at time of diagnosis who are aged  $\geq 40$  years and  $< 80$  years.

The **secondary aims** of the trial are:

1. to compare the effects of treatment with (i) anticoagulation at prophylactic doses; (ii) anticoagulation at therapeutic doses; (iii) antiplatelet therapy; and (iv) placebo relative to each other on the following secondary endpoints up to 45 days after initiation of assigned treatment among COVID-19 patients not requiring hospitalization at time of diagnosis who are aged  $\geq 40$  years and  $< 80$  years:
  - need for hospitalization for cardiovascular/pulmonary events
  - venous thromboembolism including symptomatic DVT and PE.
  - arterial thrombotic events including MI, ischemic stroke, and arterial thromboembolism.
  - all-cause mortality.
  - mortality without antecedent hospitalization.
  - the time-to-event for the primary composite endpoint of symptomatic deep venous thrombosis, pulmonary embolism, arterial thromboembolism, myocardial infarction, ischemic stroke, need for hospitalization for cardiovascular/pulmonary events, and all-cause mortality
  - a clinical rank-based score.
2. to compare the effects of treatment with (i) combined prophylactic and therapeutic doses of apixaban with (ii) placebo for the primary endpoints for efficacy and for safety.
3. to test whether D-dimer and/or hsCRP modify the treatment effect of assigned treatment on the trial primary and secondary outcomes.

The **safety aims** of the trial are to compare the effects of treatment with (i) anticoagulation at prophylactic doses; (ii) anticoagulation at therapeutic doses; (iii) antiplatelet therapy; and (iv) placebo relative to each other on bleeding outcomes for up to 45 days after initiation of assigned treatment and after an additional 30 days of safety follow up (day 75) among COVID-19 patients not requiring hospitalization at time of diagnosis who are aged  $\geq 40$  years and  $< 80$  years.

- ISTH major bleeding
- ISTH clinically relevant non-major bleeding (CRNMB).
- development of disseminated intravascular coagulation (DIC)

62 **2. STUDY DESIGN**

63  
64 **2.1 POPULATION**

65  
66 The trial eligibility criteria for randomization are listed below.

67  
68 **Inclusion Criteria**

- 69 • Age between 40 and 80 years inclusive
- 70 • Documentation of PCR or antigen test positive symptomatic COVID-19 infection in the
- 71 past 14 days
- 72 • Ability to be contacted by telephone or other electronic methods of communication
- 73 • Negative pregnancy test for women of child bearing potential

74  
75 **Exclusion Criteria**

- 76 • Indication for therapeutic anticoagulation (mechanical heart valve, AF, APS)
- 77 • Indication for single or dual antiplatelet therapy
- 78 • Lactating
- 79 • Primary brain tumor or acute leukemia
- 80 • Bleeding risk defined as hospitalization in the past 2 months for:
  - 81 ○ bleeding due to ulcer or GI tract disease
  - 82 ○ major surgery
  - 83 ○ stroke
  - 84 ○ intracranial hemorrhage
- 85 • Platelet count < 100,000 per microliter (can be obtained after randomization)
- 86 • Calculated creatinine clearance < 30 ml/min (can be obtained after randomization)
- 87 • Ever hospitalized after diagnosis of COVID-19
- 88 • Concomitant need for strong inducers/inhibitors of p-gp and CYP3A4
- 89 • SARS-CoV-2 PCR or antigen test more than 14 days prior to randomization
- 90 • Unable to give written informed consent

91  
92  
93 **2.2 INTERVENTIONS**

94  
95 **Assigned Intervention Groups:** Participants will be randomized at a 1:1:1:1 ratio to the four

96 treatment groups using a permuted block design.

97

| Group | Treatment | Dose AM | Dose PM | Duration |
|-------|-----------|---------|---------|----------|
| 1.    | Apixaban  | 2.5 mg  | 2.5 mg  | 45 days  |
| 2.    | Apixaban  | 5.0 mg  | 5.0 mg  | 45 days  |
| 3.    | Aspirin   | 81 mg   | Placebo | 45 days  |
| 4.    | Placebo   | Placebo | Placebo | 45 days  |

98  
99 For randomized participants, treatment duration will be 45 days unless a primary, secondary, or

100 safety outcome occurs before 45 days in which case treatment may be stopped for clinical

101 reasons.

102  
103  
104  
105  
106  
107  
108  
109  
110  
111  
112  
113  
114  
115  
116  
117  
118  
119  
120  
121  
122  
123  
124  
125  
126  
127  
128  
129  
130  
131  
132  
133  
134  
135  
136  
137  
138  
139  
140  
141  
142  
143  
144  
145

## 2.3 OUTCOMES AND TIMING

The **primary endpoint** is the binary (yes/no) composite efficacy endpoint indicating that any of the following events occurred: symptomatic deep venous thrombosis, pulmonary embolism, arterial thromboembolism, myocardial infarction, ischemic stroke, need for hospitalization for cardiovascular/pulmonary events, and all-cause mortality.

Primary treatment comparisons will be conducted in the sample of **randomized participants who initiate treatment and have at least one follow-up contact**. A follow-up visit includes a contact where patient-reported outcomes or site-reported outcomes about patient status are collected. In this modified intention to treat (mITT) sample of patients, endpoint events will be tabulated from initiation of assigned therapy through 45 days after treatment initiation. Additional analyses will be conducted in the sample of **all randomized participants**. In the complete randomized sample, follow-up will begin at the time of randomization.

A **key secondary endpoint** is the Kaplan Meier time-to-event estimate of the cumulative risk of the primary composite endpoint. For treatment comparisons among randomized participants who initiate treatment, the cumulative risk 45-days after initiation of assigned therapy will be estimated, and for analyses among all randomized participants, the cumulative risk 45-days after randomization will be estimated.

The **secondary endpoints** are:

- Hospitalization for cardiovascular/pulmonary events
- Venous thromboembolism, a composite of symptomatic DVT and PE.
- Symptomatic DVT
- Pulmonary embolism
- Arterial thrombotic events, a composite of MI, ischemic stroke and arterial embolism
- Myocardial infarction
- Ischemic stroke
- Arterial thromboembolism
- All-cause mortality
- Mortality without antecedent hospitalization

Timing for the secondary endpoints is the same as what is described for the primary composite efficacy endpoint.

An **exploratory tertiary endpoint** is a clinical rank-based score. This clinical rank-based score is defined as the worst category accomplished during the 45-day treatment period (i.e. starting at treatment initiation) using the numeric rankings from best (score=1) to worst (score=9):

1. No clinical event (i.e. no study endpoint, safety endpoint or urgent/emergent health care encounter). A minor bleed that does not involve seeking medical attention is not a trial safety endpoint and hence is counted in this category.
2. Non-fatal bleeding that requires medical attention but not a hospital admission

- 146 3. Non-fatal event that is one of the composite primary events that requires an urgent care  
147 center visit or emergency room visit but not a hospital admission (e.g. this includes a  
148 DVT or pulmonary embolism that do not result in a hospital admission)
- 149 4. Non-fatal hospitalization for bleeding event or cardiovascular/pulmonary event not  
150 including stroke, MI, pulmonary embolism or DVT.
- 151 5. Non-fatal hospitalization for DVT
- 152 6. Non-fatal hospitalization for PE
- 153 7. Non-fatal hospitalization for MI
- 154 8. Non-fatal hospitalization for stroke
- 155 9. Death

156

157 The **safety endpoints** are:

- 158 • Major bleeding (ISTH major bleeding)
  - 159 ○ Drop in hemoglobin of 2 gm/dl attributed to bleeding and
  - 160 ○ Requiring transfusion of 2 or more units
  - 161 ○ Bleeding in a critical site which includes hemorrhagic stroke and intracranial  
162 hemorrhage
  - 163 ○ Fatal bleeding
- 164 • Mild bleeding (ISTH CRNMB): Non-major clinically relevant bleeding is defined as  
165 overt bleeding not meeting the criteria for major bleeding but associated with medical  
166 intervention, unscheduled contact (visit or telephone call) with a physician,  
167 (temporary) cessation of study intervention, or associated with discomfort for the  
168 participant such as pain or impairment of activities of daily life.
- 169 • Development of disseminated intravascular coagulation (DIC)

170

171 For the treatment comparisons among randomized participants who initiate treatment and have  
172 at least one follow-up contact, safety endpoints will be tabulated from initiation of assigned  
173 therapy through 45 days after treatment initiation and through 75 days after treatment initiation.  
174 For analyses involving all randomized participants, safety outcomes will be tabulated from time  
175 of randomization through 45 days after randomization and up to 75 days after randomization.

176

## 177 **2.4 POWER AND SAMPLE SIZE**

178

179 We determined the samples sizes required to provide 80% and 90% power to detect a relative  
180 reduction of 33% in the 45-day primary outcome event rates between two assigned treatment  
181 groups using chi-square statistic with one-sided test with  $\alpha=0.025$ . Based on these  
182 estimates, we proposed a total sample of N=7000 patients with N=1750 patients assigned to  
183 each of the four treatment arms. Assuming a placebo event rate of 8.0%, a trial with N=1750  
184 patients in each arm will have 80% power to detect superiority of apixaban 5.0 mg to placebo  
185 when there is a 30% relative reduction in risk (i.e. 8.0% vs. 5.62%) and 90% power with a 34%  
186 relative reduction (i.e. 8.0% vs. 5.28%). Assuming an event rate of 6.0% with aspirin, a trial with  
187 N=1750 patients in each arm will have 80% power to detect superiority of apixaban 5.0 mg to  
188 aspirin when there is a 34% relative reduction in risk (i.e. 6.0% vs. 3.94%) and 90% power with  
189 a 39% relative reduction (i.e. 6.0% vs. 3.65%).

190

191 Since we hypothesize that the active treatments will be beneficial, we estimated that the overall  
192 primary composite efficacy endpoint event risk in the trial (i.e. all treatment groups combined)  
193 will be this population is approximately 7.0%. We also estimated the overall bleeding event rate  
194 will be approximately 1.0%. With a total of N=7000 patients, we therefore assumed that we will  
195 observe approximately 490 patients with primary endpoint events and 70 with bleeding events.  
196

## 197 **2.5 ENDPOINT ADJUDICATION**

198  
199 All events suggestive of the primary composite endpoint will be adjudicated by a central  
200 independent Clinical Endpoints Committee (CEC). All of the suspected endpoint events will be  
201 classified by the CEC so that each of the defined secondary endpoint events will be adjudicated.  
202 All suspected bleeding events deemed to be clinically relevant non-major bleeding (CRNMB),  
203 major bleeding or DIC will be adjudicated by the CEC. The specific endpoints are each defined  
204 in the ACTIV-4B Clinical Endpoints Committee Charter.  
205

206 The options available to the adjudicators include the ability to confirm an event (if there is  
207 sufficient clinical information to support the endpoint), disconfirm the event (if there is sufficient  
208 clinical information to disconfirm the endpoint), or mark the event as having “insufficient  
209 evidence” for confirmation (or for disconfirmation).  
210

## 211 **2.6 BLINDING**

212  
213 The ACTIV-4B Outpatient trial is double blinded. All study participants, clinical investigators,  
214 staff who collect data, medical monitors who classify adverse events, and Clinical Endpoints  
215 Committee members who adjudicate study endpoints are blinded to treatment assignment. Only  
216 the central data management and the unblinded statistical team have access to the treatment  
217 assignments. Protocols have been developed so that treatment assignment may be revealed  
218 in cases of clinical emergencies.  
219

## 220 **2.7 ANALYSIS POPULATIONS**

221  
222 **Modified Intention to Treat (mITT) Population:** The primary treatment comparisons will be  
223 based on the modified intention to treat (mITT) principle. The mITT analyses will include only  
224 **randomized participants who initiate their assigned treatment regimen and for whom**  
225 **there is at least one follow-up visit.** A follow-up visit includes a contact where patient-  
226 reported outcomes or site-reported outcomes about patient status are collected. Analyses in  
227 this sample will be conducted based on the randomly assigned treatment starting at the time of  
228 treatment initiation.  
229

230 **All Randomized Patients:** The population of all randomized participants will be evaluated from  
231 time of randomization onward. The combined population will be used to estimate the overall  
232 risk of events in this patient cohort. Secondary treatment comparisons will be conducted using  
233 the intention to treat (ITT) principle based on the randomly assigned treatment group starting at  
234 the time of randomization.  
235

236 **Per Protocol Population:** The group of randomized participants who report taking  $\geq 70\%$  of  
237 their pills per week for  $\geq 5$  weeks or until the time of a primary outcome or safety event occurred

238 will be considered adherent to the trial treatment regimen and will be included in the per protocol  
239 sample. Analysis of this per protocol group will begin at the time of treatment initiation. mITT  
240 participants who adhered to their assigned treatment and have complete 45-day follow-up or  
241 complete follow-up up to the time of a hospitalization or a death will be included in the analysis  
242 of the per protocol group.

243

## 244 **2.8 HANDLING MISSING DATA**

245

246 **Missing Outcome Data:** The primary endpoint for the ACTIV-4B Outpatient trial is a binary  
247 (yes/no) outcome indicating whether any of the listed events occurred within 45 days of  
248 treatment initiation. Hence, our primary analysis will be conducted in the sample for whom 45-  
249 day outcome data is available (45 day follow-up completed or a death). We expect that the  
250 percentage of participants with missing 45-day outcome data due to withdrawal or loss to follow-  
251 up will be small (<5%) and that the probability of missing data will be similar across the four  
252 treatment arms and will be weakly associated with the missing endpoint.

253

254 We will compare those participants with and without missing endpoint data by treatment group  
255 and by baseline demographic features. We will also present the likelihood that missing data  
256 would change the conclusions about the treatment effects using a tipping point analyses. By  
257 systematically and comprehensively varying assumptions about the missing outcomes in the  
258 four treatment arms, we will explore the whether the conclusions change. We will allow  
259 assumptions about the missing outcomes in the four treatment arms to vary independently,  
260 including scenarios where dropouts on active drugs tend to have worse outcomes than dropouts  
261 on control. This approach is consistent with recent FDA guidelines (E9(R1)-Statistical-  
262 Principles-for-Clinical-Trials attached).

263

264 The secondary endpoint, the Kaplan-Meier estimate of the cumulative risk of a primary endpoint  
265 at 45 days, appropriately accounts for variable follow-up time under the assumption of non-  
266 informative censoring. Analysis of this time to event outcome among all randomized or mITT  
267 participants (i.e. those with and without missing 45-day data) will provide further insight about  
268 the robustness of the trial conclusions based on the primary composite efficacy endpoint.

269

270 **Missing Adjudication Data:** Each suspected specified efficacy and bleeding event is  
271 adjudicated by the CEC based on medical records. In the rare case when medical records  
272 cannot be obtained, the adjudicators will review all available information including narratives  
273 from the local principal investigator or members of the study team who reported the event. The  
274 adjudicators will use all available information to classify the event as confirmed, disconfirmed or  
275 insufficient evidence. The primary analyses will be based on confirmed events. A secondary  
276 sensitivity analysis will be based on events that are confirmed and those that have insufficient  
277 evidence.

278

279 **Missing Covariate Data:** Data will not be removed from the primary analyses due to missing  
280 covariate data. Variables that have <10% missing data will be imputed using single imputation.  
281 Categorical variables that have > 10% missing data will include a category for missing data.  
282 Continuous variables that have > 10% missing data will be imputed using single imputation and  
283 a missing indicator variable will be added to the model.

284

285  
286  
287  
288  
289  
290  
291  
292  
293  
294  
295  
296  
297  
298  
299  
300  
301  
302  
303  
304  
305  
306  
307  
308  
309  
310  
311  
312  
313  
314  
315  
316  
317  
318  
319  
320  
321  
322  
323  
324  
325  
326  
327  
328  
329  
330

### **3. STATISTICAL ANALYSIS PLAN**

#### **3.1 BASELINE DESCRIPTIVE STATISTICS**

The distribution of demographic, clinical history, medications and biomarker variables will be examined and transformations will be applied as needed. Baseline characteristics will be examined for all randomized participants, for the entire mITT sample, and by assigned treatment group within the mITT group. Variables will be summarized using mean, standard deviation or median (first and third quartile) for continuous variables and frequency (percentage) for categorical variables. No test of significance levels will be reported for baseline variables.

#### **3.2 RETENTION ANALYSES**

The proportion of mITT participants who withdraw or are lost to follow-up before 45-days of follow-up will be tabulated overall and by treatment group. Baseline characteristics of patients with missing primary outcome data will be compared to those with complete data.

#### **3.3 ADHERENCE ANALYSES**

The proportion of mITT participants overall and in each assigned treatment group who have interrupted treatment permanently or temporarily and the reason for interruption will be described. We will present the proportion of participants who took  $\geq 70\%$  of their pills as prescribed for  $\geq 5$  weeks or until a clinical event occurred in the overall mITT sample and stratified by assigned treatment group.

#### **3.4 PRIMARY OUTCOME ANALYSIS**

The primary analyses will be conducted in the mITT sample based on the randomly assigned treatment starting at the time of treatment initiation. Participants who complete at least one follow-up visit after starting their assigned drug treatment will be included in the analysis.

The odds of the primary composite efficacy endpoint in the mITT sample will be modeled using a logistic regression model defined as:

$$\text{Log}(p/1-p) = \beta_0 + \beta_1 \text{Apixiban5.0} + \beta_2 \text{Apixiban2.5} + \beta_3 \text{Asipirin} + \beta_4 \text{Non-US} + \beta_5 \text{age} + \beta_6 \text{female} \\ + \beta_7 \text{BlackNH} + \beta_8 \text{Hispanic} + \beta_9 \text{OtherRE} + \beta_{10} \text{D-Dimer} + \beta_{11} \text{HsCRP} + \beta_{12} \text{Weight} \\ + \beta_{13} \text{CrClearance}$$

Race/ethnicity will be defined as white non-Hispanic, black non-Hispanic, Hispanic, and Other/unknown race/ethnicity. White non-Hispanic race/ethnicity will serve as the references group.

The placebo treatment group will serve as the “reference” treatment group in this model, and we will test whether the coefficient for each active treatment group relative to the reference placebo group is equal to 0 using a two-sided test with  $\alpha=0.05$ . Other pairwise treatment



331 comparisons (apixaban 5.0 versus apixaban 2.5, apixaban 5.0 versus aspirin, apixaban 2.5  
332 versus aspirin) will be conducted, and the effect of treatment with apixaban (i.e. the combined  
333 group including both apixaban 5.0 and apixaban 2.5) will be compared with placebo.

334  
335 If the number of mITT participants with a primary composite efficacy endpoint event in the 45-  
336 days after treatment initiation is low, a logistic regression model with a reduced number of  
337 covariates must be used in order to have adequate degrees of freedom for valid estimation.  
338 Below are the planned models to be used for the primary treatment comparison under the  
339 scenarios that the number of patients with primary endpoint events is <30, 30-49, and ≥50. The  
340 same treatment contrasts will be computed in the reduced models as described for the full  
341 model.

342  
343 **If the number of mITT participants with a primary endpoint event is <30**, an unadjusted  
344 logistic regression model will be used as the primary model to assess the effect of assigned  
345 treatment.

346  
347  $\text{Log}(p/1-p) = \beta_0 + \beta_1\text{Apixiban5.0} + \beta_2\text{Apixiban2.5} + \beta_3\text{Aspirin}$

348  
349 **If the number of mITT participants with a primary endpoint event is 30-49**, a logistic  
350 regression model adjusting only for age and D-dimer level will be used as the primary model to  
351 assess the effect of assigned treatment.

352  
353  $\text{Log}(p/1-p) = \beta_0 + \beta_1\text{Apixiban5.0} + \beta_2\text{Apixiban2.5} + \beta_3\text{Aspirin} + \beta_4\text{age} + \beta_5\text{D-Dimer}$

354  
355 **If the number of mITT participants with a primary endpoint event is ≥50**, the full logistic  
356 regression model will be used as the primary model to assess the effect of assigned treatment.

357  
358  $\text{Log}(p/1-p) = \beta_0 + \beta_1\text{Apixiban5.0} + \beta_2\text{Apixiban2.5} + \beta_3\text{Aspirin} + \beta_4\text{Non-US} + \beta_5\text{age} + \beta_6\text{female}$   
359  $+ \beta_7\text{BlackNH} + \beta_8\text{Hispanic} + \beta_9\text{OtherRE} + \beta_{10}\text{D-Dimer} + \beta_{11}\text{HsCRP} + \beta_{12}\text{Weight}$   
360  $+ \beta_{13}\text{CrClearance}$

361  
362 In addition to the primary logistic regression analysis, the unadjusted estimated risk of the  
363 primary composite efficacy endpoint in each treatment group (i.e. # of participants with an event  
364 / # of participants in the group), and the pairwise relative risks and absolute risk differences with  
365 95% confidence intervals will be calculated and presented.

366  
367 An ITT and a per protocol analysis will be conducted by running the multivariable adjusted  
368 logistic regression model and the unadjusted risk estimates using the corresponding sample  
369 and relevant exposure time.

### 370 371 **3.5 KEY SECONDARY OUTCOME ANALYSES**

372  
373 Kaplan-Meier cumulative incidence curves will be created for the primary composite efficacy  
374 endpoint up to 45 days after treatment initiation stratified by assigned treatment group in the  
375 mITT sample. Log-rank statistics will be computed to compare the time to event estimates over  
376 time among the four treatment groups. The estimated cumulative risk at 45-days and the 95%  
377 confidence interval for the estimated cumulative risk at 45-days will be determined for each

378 treatment group. Pairwise differences and 95% confidence intervals for differences will be  
379 computed. The combined group of prophylactic and therapeutic doses of apixaban will be  
380 compared with placebo.

381  
382 Kaplan-Meier cumulative incidence curves will be created for the primary composite efficacy  
383 endpoint up to 45 days after randomization for the complete randomized sample overall and  
384 stratified by assigned treatment group (ITT). Log-rank statistics will be computed to compare  
385 the time to event estimates over time among the four assigned treatment groups. The  
386 estimated cumulative risk at 45-days and the 95% confidence interval for the estimated  
387 cumulative risk at 45-days will be determined for the overall group and for each treatment group.

### 388 389 **3.6 SECONDARY OUTCOME ANALYSES**

390  
391 For each defined secondary outcome event, the unadjusted risk of the endpoint in each  
392 treatment group (i.e. # of participants with the specified event / # of participants in the group)  
393 and pairwise relative risks and the absolute risk difference between treatment groups will be  
394 calculated with their 95% confidence intervals. In addition, the effect of treatment with apixaban  
395 (i.e. prophylactic and therapeutic groups combined) will be compared with placebo.

### 396 397 **3.6 EXPLORATORY TERTIARY OUTCOME ANALYSES**

398  
399 The distribution across the 9 categories of the clinical rank-based score and the median and  
400 25<sup>th</sup> and 75<sup>th</sup> percentile will be present each treatment group in the mITT sample. Kruskal-  
401 Wallace tests will be used to compare the distribution of the clinical rank-based score among  
402 the assigned treatment groups in the mITT sample. Pairwise comparisons with Wilcoxon rank  
403 sum statistics will be conducted to determine if one treatment has a “better” outcome relative to  
404 another.

### 405 406 **3.7 SAFETY ANALYSES**

407  
408 The risk and 95% CI of each defined safety endpoint event and the composite of any defined  
409 safety endpoint event (major bleeding, CRNMB or DIC) at 45 and at 75 days will be computed  
410 for each treatment group in the mITT. Pairwise relative risks and absolute risk differences  
411 between treatment groups will be calculated with their 95% confidence intervals.

### 412 413 **3.8 SUBGROUP ANALYSES AND EFFECT MODIFICATION**

414  
415 A select number of subgroup variables have been specified a priori:

- 416 • D-dimer (<1.0 ULN, [1.0-2.0 ULN), [2.0-3.0 ULN), ≥ 3.0 ULN, or by quartiles if needed)
- 417 • CRP by quartiles based on the data
- 418 • Age (<60 years, ≥60 years)
- 419 • Sex
- 420 • Race/ethnicity (White non-Hispanic, Black non-Hispanic, Hispanic, other)
- 421 • Renal function (creatinine clearance 30-49 ml/min, 50-90 ml/min, >91 ml/min)

422

423 The risk of the primary composite efficacy endpoint outcome and the 45-day risk of major  
424 bleeding with 95% confidence intervals will be estimated in each treatment group within each  
425 subgroup for the mITT sample. Evidence of effect modification of the treatment effectiveness by  
426 subgroup will be tested by creating a logistic regression model including the subgroup variable,  
427 treatment assignment, and the interaction between the subgroup variable and treatment  
428 assignment. If a subgroup variable is inherently continuous (i.e. D-dimer, CRP and age), these  
429 variables will be appropriately transformed as needed to approximate a normal distribution, and  
430 included in the model as a continuous variable. The significance of the interaction term will be  
431 presented. Additional subgroups may be examined in exploratory analyses based on observed  
432 results from the trial or information from external sources.

433

434 We will examine the distribution of baseline D-dimer in the entire mITT and in the randomized  
435 sample, and we will analyze the odds of the primary composite efficacy endpoint and major  
436 bleeding, irrespective of assigned treatment group by D-Dimer subgroup. Logistic regression  
437 models and associated ROC curves will be created for the primary efficacy endpoint and for  
438 major bleeding by continuous D-dimer level. LOESS curves for the logit of the primary efficacy  
439 endpoint and for major bleeding by continuous D-dimer level will also be examined.

440

### 441 **3.9 ANALYSIS OF DURATION OF TREATMENT**

442

443 Kaplan-Meier cumulative incidence curves will be created to assess the time to the first primary  
444 endpoint event and the time to the first safety event, irrespective of treatment assignment.  
445 Assuming that bleeding events occur at a fairly constant rate over time, we suggest that if  $\geq$   
446 90% of the primary endpoint events occur in the first 21 days, then the DSMB will consider  
447 modifying the treatment arms such that the duration of therapy is shortened to 21 days. Curves  
448 stratified by treatment group will be examined before finalizing a recommendation.

449

450

## 451 **4. INTERIM MONITORING PLAN FOR EFFICACY, FUTILITY AND SAFETY**

452

### 453 **4.1 OVERVIEW OF PLANNED INTERIM ANALYSIS**

454

455 An independent data safety and monitoring board (DSMB) will review all interim analyses  
456 prepared by an unblinded statistician. The number of patients randomized, the number of  
457 randomized participants who initiated treatment and the primary, secondary and safety  
458 endpoints for the entire randomized and the entire mITT samples will be presented. Unadjusted  
459 risk of the defined primary, secondary and safety endpoints by assigned treatment group in the  
460 mITT sample will be examined on a monthly basis. For DSMB presentation, two versions of the  
461 primary, secondary and safety endpoint tables will be presented: one table will include the best  
462 information available which will include the adjudicated endpoints for events that have been  
463 classified by the CEC and self-reported endpoints for events that have not been classified by  
464 the CEC, and a second table that will include adjudicated endpoints only. A complete interim  
465 analysis of efficacy, futility, and safety will be conducted for each full DSMB review meeting  
466 which will occur approximately every 3 months.

467

468 A Bayesian analytic approach is proposed for the interim monitoring plan in order to utilize prior  
469 information when estimating the posterior probabilities in the sequential interim analyses.

470 Initially, the placebo group will serve as the “control group”; however, if the placebo arm is  
471 dropped and the trial continues, the aspirin arm will be designated as the control group for future  
472 treatment comparisons.

473

474 Decision rules have been established for efficacy based on the posterior probability that the  
475 active treatment regimen is beneficial as compared to placebo with respect to the primary  
476 composite efficacy endpoint. Decision rules were created such that the overall type I error  
477 approximates the pre-specified  $\alpha=0.025$  for a one-sided test. Assuming a non-informative  
478 prior distribution for each odds ratio at the first interim analysis, we will calculate the posterior  
479 probability that an active treatment is superior to placebo. We will update these posterior  
480 probabilities with new data at each subsequent interim analysis. If the posterior probability  
481 exceeds the pre-specified threshold for superiority at any of the interim analyses, the superior  
482 treatment will be declared efficacious and the other treatment may be dropped.

483

484 Decision rules have been developed for assessing futility of the active treatments. The posterior  
485 probability that each of the active treatments is inferior or equivalent to placebo with respect to  
486 the primary composite efficacy endpoint will be calculated assuming non-informative priors at  
487 the outset of the trial. When the posterior probability exceeds a specified threshold, futility will  
488 be established and the respective active therapy may be dropped from the trial.

489

490 Safety data will be presented and analyzed at each meeting, but no formal decision rules will be  
491 established a priori for the bleeding safety endpoints. Data will be presented so that the DSMB  
492 can evaluate the net risk benefit ratio for each treatment.

493

494 At each meeting, the DSMB will examine the rate of enrollment (and treatment initiation) in the  
495 trial as well as the overall risk of the primary endpoint. Based on this information, they may  
496 request a traditional futility analysis of conditional power to detect superiority. This involves a  
497 determination of the detectable risk ratio (or relative risk reduction) conditional on the observed  
498 data at that time under various assumptions regarding the future risk of endpoint events and the  
499 underlying treatment risk ratios.

500

#### 501 **4.2 FORMAL MONITORING OF SUPERIORITY BASED ON PRIMARY ENDPOINT**

502

503 A logistic regression model will be created for the primary composite efficacy endpoint such that  
504 the effect of each active treatment group (relative to the placebo reference group) will be  
505 estimated adjusting for covariates (age, sex, race/ethnicity, D-dimer, and hsCRP, weight and  
506 calculated creatinine clearance) as specified in Section 3.4 based on the observed number of  
507 participants with events. The primary analyses for efficacy will be based on the odds ratios,  
508 comparing one treatment to another, derived from this model. One treatment is beneficial  
509 compared to another if the [ Odds Ratio < 1.00 ] for the primary composite outcome. Assuming  
510 non-informative priors at the first look, we will calculate the posterior probabilities that the [ Odds  
511 Ratio < 1.00 ] for each active treatment compared to placebo. If at any analysis time-point, the  
512 upper bound of the lower 99% credible interval for the odds ratio is less than 1.00, the active  
513 treatment arm will be considered superior.

514

515 ***The decision rule for declaring superiority based on the primary composite outcome is:***  
516  ***$\geq 0.99$  Posterior Probability that the OR (active vs placebo) < 1.00***

517  
518 The DSMB will use this information to make a recommendation to the NHLBI. The DSMB can  
519 recommend that the Outpatient COVID-19 trial should continue as proposed, that the control  
520 treatment arm should be dropped from the trial, that the trial protocol should be modified, or that  
521 the Outpatient COVID-19 trial should be terminated early. The final decision to stop trial rests  
522 with the NHLBI.

#### 523 524 **4.3 FORMAL MONITORING OF FUTILITY BASED ON PRIMARY ENDPOINT**

525  
526 Using the same logistic regression model that will be used for the primary analyses, we will  
527 determine the posterior probability that the active arm is equivalent or inferior to placebo  
528 adjusting for covariates (age, sex, race/ethnicity, D-dimer, and hsCRP, weight and calculated  
529 creatinine clearance) as specified in Section 3.4 based on the observed number of participants  
530 with events. Given that the trial was designed to have powered to detect a relative risk  
531 reduction of 33% with active treatment, futility will be defined for an active arm if the lower  
532 bound of the upper 95% credible interval for the odds ratio comparing the active arm to placebo  
533 is greater than 0.75.

534  
535 ***The decision rule for declaring futility based on the primary composite outcome is:***  
536  ***$\geq 0.95$  Posterior Probability that the OR (active vs placebo)  $> 0.75$***

537  
538 This roughly corresponds to the having an estimated Odds Ratio that is 1.00 (or greater) and  
539 the two-sided 90% confidence interval extends from 0.75 to 1.33 (or greater).

540  
541 The DSMB will use this information to determine its recommendation to NHLBI. The DSMB can  
542 recommend that the Outpatient COVID-19 trial should continue as proposed, that the futile  
543 active treatment arm should be dropped from the trial, that the trial protocol should be modified,  
544 or that the Outpatient COVID-19 trial should be terminated early. The NHLBI will make the final  
545 decision.

#### 546 547 **4.4 MONITORING SAFETY**

548  
549 A logistic regression model will be created for the major bleeding endpoint and for the  
550 composite safety endpoint (major bleeding, CRNMB and DIC) such that the effect of each active  
551 treatment group (relative to the placebo reference group) will be estimated and the odds ratios,  
552 comparing one treatment to another, will be derived from this model. We will not create explicit  
553 decision rules based on the bleeding posterior probability.

554  
555 If safety issues arise, the DSMB will use their clinical judgement to assess the potential risks  
556 relative to the potential benefits for each active drug compared to control. The DSMB may also  
557 examine the safety and efficacy data in subgroups known to be high risk for bleeding such as  
558 those with older age and/or higher BMI. The DSMB will use the monitoring information to  
559 determine its recommendation to NHLBI. The DSMB can recommend that the Outpatient  
560 COVID-19 trial should continue as proposed, that one treatment arm may be dropped, that the  
561 trial protocol should be modified, or that the Outpatient COVID-19 trial should be terminated  
562 early for safety reasons.

563

564 **4.5 STUDY STAGES AND INTERVENTIONS**

565

566 The first Stage of this study has been determined and is outlined above. In Stage 1, there will be  
567 four intervention arms: (1) prophylactic anticoagulation with apixaban 2.5mg po bid; (2)  
568 therapeutic anticoagulation with apixaban 5.0mg op bid; (3) antiplatelet therapy with low dose  
569 aspirin 81mg po qd and (4) placebo. Subsequent Stages will incorporate recommendations from  
570 the DSMB.

571

572 The overarching plan for adaptive changes are as follows:

573

574 1. **If an active drug is found to be futile relative to placebo** (i.e. results indicate that an  
575 active arm is associated with a slightly reduced risk, no effect, or a greater risk of the  
576 primary outcome as compared with placebo): The futile active arm will be dropped, no new  
577 treatment arm will be added, and the trial will continue with the remaining treatment arms.  
578 The randomization scheme will be adjusted to include the 3 remaining arms with equal  
579 probabilities (i.e. 1:1:1), and the treatment comparisons among these arms will continue as  
580 designed.

581

582 2. **If an active drug is found to be superior to placebo:** We will declare a winner, and we will  
583 announce this finding. The placebo arm will be dropped. If the observed differences  
584 between the superior active arm and all of the other active arms are sizable (e.g. >20%  
585 relative reduction) but do not yet cross the decision boundary, the trial may be terminated  
586 based on a risk/benefit analysis by the DSMB. If the observed differences between the  
587 superior active arm and at least one of the other active arms is small, this would be  
588 announced, and the trial may continue with the “competitive arms” based on a risk/benefit  
589 analysis by the DSMB. The randomization scheme will be modified to assign each of the  
590 remaining treatment arms with an equal probability. The aspirin arm will become the  
591 reference arm for future statistical models.

592

593 3. **If a promising new drug is identified from external studies:** At the outset of this trial, we  
594 do not plan on adding any new treatment arms. However, if a promising candidate drug  
595 were to be identified in the next 6 months, we will consider adding an arm to the trial based  
596 on time and other pragmatic considerations. The randomization scheme and analytic  
597 approach would be modified to include an extra treatment arm.

598

599
