# Supplementary material
Source: PubMed Central journal article supplement (PMC8506296)
Supplement: jama-e2117272-s004.pdf [file jama-e2117272-s004.pdf]

\*Indicates required information. Only first name, last name, and suffix will appear in PubMed.

| <b>Group Name: ACTIV-4B Investigators</b> |                   |                              |                  |                                                                    |                                          |                                                         |                                                                                            |
|-------------------------------------------|-------------------|------------------------------|------------------|--------------------------------------------------------------------|------------------------------------------|---------------------------------------------------------|--------------------------------------------------------------------------------------------|
| <b>*First Name and Middle Initial(s)</b>  | <b>*Last Name</b> | <b>*Suffix (eg, Jr, III)</b> | Academic Degrees | Institution                                                        | Location (city, state/province, country) | Role or Contribution, eg, chair, principal investigator | Group (if more than 1 Group listed in the byline) and/or Subgroup (eg, Steering Committee) |
| Scott                                     | Brakenridge       |                              | MD               |                                                                    |                                          | Protocol Development Committee                          |                                                                                            |
| Eric                                      | Leifer            |                              | PhD              | National Heart, Lung, and Blood Institute                          | Bethesda, Maryland, USA                  | Protocol Development Committee                          |                                                                                            |
| Andrea                                    | Troxel            |                              | ScD              | NYU Grossman School of Medicine                                    | New York, NY USA                         | Protocol Development Committee                          |                                                                                            |
| Aldo                                      | Maggioni          |                              | MD               | ANMCO Research Center                                              | Firenze, Italy                           | Protocol Development Committee                          |                                                                                            |
| Jeff                                      | Jacobson          |                              | MD               |                                                                    |                                          | Protocol Development Committee                          |                                                                                            |
| Renato D.                                 | Lopes             |                              | MD PhD           | Duke University Medical Center, Duke Clinical Research Institute.  | Durham, NC, USA.                         | Protocol Development Committee                          |                                                                                            |
| Rob                                       | Mentz             |                              | MD               |                                                                    |                                          | Protocol Development Committee                          |                                                                                            |
| Michelle                                  | Sholzberg         |                              | MDCM MSc FRCPC   | St Michael's Hospital, University of Toronto School of Medicine    | Toronto, Canada                          | Protocol Development Committee                          |                                                                                            |
| John H.                                   | Alexander         |                              | MD MHS           | Duke University                                                    | Durham, NC                               | Protocol Development Committee                          |                                                                                            |
| Donald                                    | Schreiber         |                              | MD               | Dept of Emergency Medicine, Stanford University School of Medicine | Palo Alto, CA                            | Site Principal investigator                             |                                                                                            |

## Supplemental Online Content: Nonauthor Collaborators

\*Indicates required information. Only first name, last name, and suffix will appear in PubMed.

| *First Name and Middle Initial(s) | *Last Name   | *Suffix (eg, Jr, III) | Academic Degrees | Institution                                                                       | Location (city, state/province, country) | Role or Contribution, eg, chair, principal investigator | Group (if more than 1 Group listed in the byline) and/or Subgroup (eg, Steering Committee) |
|-----------------------------------|--------------|-----------------------|------------------|-----------------------------------------------------------------------------------|------------------------------------------|---------------------------------------------------------|--------------------------------------------------------------------------------------------|
| Kabir                             | Yadav        |                       | MDCM MS MSHS     | Harbor-UCLA Medical Center, and The Lundquist Institute for Biomedical Innovation | Torrance, CA                             | Site Principal investigator                             |                                                                                            |
| Anthony                           | Vecchiarelli |                       | MD               |                                                                                   | Colorado Springs, CO                     | Site Principal investigator                             |                                                                                            |
| Godson                            | Oguchi       |                       | MD               |                                                                                   | Deland, FL                               | Site Principal investigator                             |                                                                                            |
| Lisa                              | Merck        |                       | MD MPH           | University of Florida Gainesville                                                 | Gainesville, FL                          | Site Principal investigator                             |                                                                                            |
| Victoria                          | Altagracia   |                       | MD               |                                                                                   | Hialeah, FL                              | Site Principal investigator                             |                                                                                            |
| Antonio                           | Gonzalez     |                       | M.D              | Advanced Research for Health Improvement, LLC                                     | Immokalee, FL                            | Site Principal investigator                             |                                                                                            |
| Dominick                          | Angiolillo   |                       | MD PhD           | University of Florida                                                             | Jacksonville, FL                         | Site Principal investigator                             |                                                                                            |
| Fred                              | Blind        |                       | MD               | Lakeland Regional Health                                                          | Lakeland, FL                             | Site Principal investigator                             |                                                                                            |
| John                              | Cienki       |                       | MD MSPH          | Jackson Memorial Hospital                                                         | Miami, FL                                | Site Principal investigator                             |                                                                                            |
| Reinaldo                          | Loy          |                       | MD               |                                                                                   | Miami, FL                                | Site Principal investigator                             |                                                                                            |
| Eddie                             | Armas        |                       | MD               |                                                                                   | Miami, FL                                | Site Principal investigator                             |                                                                                            |
| Juvenal                           | Martinez     |                       | MD               | Anchor Medical Research, LLC                                                      | Miami, FL                                | Site Principal investigator                             |                                                                                            |
| Juan                              | Ruiz Unger   |                       | MD               | Innovation Clinical Trials                                                        | Palmetto Bay, FL                         | Site Principal investigator                             |                                                                                            |
| Vishal                            | Gulati       |                       | MD FAIHM CPHQ    | Ascension Sacred Heart Hospital-Pensacola                                         | Pensacola, FL                            | Site Principal investigator                             |                                                                                            |
| Temple                            | Robinson     |                       | MD               | Bond Community Health Center, Inc.                                                | Tallahassee, FL                          | Site Principal investigator                             | OneFlorida Research Consortium                                                             |
| Claudia                           | Kroker-Bode  |                       | MD PhD           | Florida State University College of Me                                            | Tallahassee, FL                          | Site Principal investigator                             |                                                                                            |

## Supplemental Online Content: Nonauthor Collaborators

\*Indicates required information. Only first name, last name, and suffix will appear in PubMed.

| *First Name and Middle Initial(s) | *Last Name   | *Suffix (eg, Jr, III) | Academic Degrees | Institution                            | Location (city, state/province, country) | Role or Contribution, eg, chair, principal investigator | Group (if more than 1 Group listed in the byline) and/or Subgroup (eg, Steering Committee) |
|-----------------------------------|--------------|-----------------------|------------------|----------------------------------------|------------------------------------------|---------------------------------------------------------|--------------------------------------------------------------------------------------------|
| Jason                             | Wilson       |                       | MD               |                                        | Tampa, FL                                | Site Principal investigator                             |                                                                                            |
| David                             | Beiser       |                       | MD MS            | University of Chicago                  | Chicago, IL                              | Site Principal investigator                             |                                                                                            |
| Maggie                            | Hagan        |                       | MD               |                                        | Wichita, KS                              | Site Principal investigator                             |                                                                                            |
| Jonathan                          | Cohen        |                       | MD               | Jadestone Clinical Research, LLC.      | Gaithersburg, MD                         | Site Principal investigator                             |                                                                                            |
| Sascha                            | Goonewardena |                       | MD               |                                        | Plymouth, MI                             | Site Principal investigator                             |                                                                                            |
| Jeffrey                           | Fletcher     |                       | MD MSc           | University of Michigan Health- West    | Wyoming, MI                              | Site Principal investigator                             |                                                                                            |
| Rowena                            | Dolor        |                       | MD MHS           | Duke University School of Medicine     | Durham, NC                               | Site Principal investigator                             |                                                                                            |
| Thomas                            | Jarrett      |                       | MD               | Peters Medical Research                | High Point, NC                           | Site Principal investigator                             |                                                                                            |
| Vijay                             | Patel        |                       | MD               |                                        | Matawan, NJ                              | Site Principal investigator                             |                                                                                            |
| Ming-Li                           | Wang         |                       | MD               |                                        | Albuquerque, NM                          | Site Principal investigator                             |                                                                                            |
| Nicole                            | Acquisto     |                       | PharmD           | University of Rochester Medical Center | Rochester, NY                            | Site Principal investigator                             |                                                                                            |
| Anderson                          | Mehrle       |                       | MD               | Ascension St John Jane Phillips Medic  | Bartlesville, OK                         | Site Principal investigator                             |                                                                                            |
| Khetpal                           | Saangeeta    |                       | MD               |                                        | Durant, OK                               | Site Principal investigator                             |                                                                                            |
| Nicholas                          | Hanna        |                       | MD               |                                        | Tulsa, OK                                | Site Principal investigator                             |                                                                                            |
| Hassan                            | Abouhouli    |                       | MD               | LAYREK CLINICAL RESEARCH               | Tulsa, OK                                | Site Principal investigator                             |                                                                                            |
| Alexandra                         | Weissman     |                       | MD MS MPH        | University of Pittsburgh, UPMC         | Pittsburgh, PA                           | Site Principal investigator                             |                                                                                            |

## Supplemental Online Content: Nonauthor Collaborators

\*Indicates required information. Only first name, last name, and suffix will appear in PubMed.

| *First Name and Middle Initial(s) | *Last Name | *Suffix (eg, Jr, III) | Academic Degrees | Institution                                         | Location (city, state/province, country) | Role or Contribution, eg, chair, principal investigator | Group (if more than 1 Group listed in the byline) and/or Subgroup (eg, Steering Committee) |
|-----------------------------------|------------|-----------------------|------------------|-----------------------------------------------------|------------------------------------------|---------------------------------------------------------|--------------------------------------------------------------------------------------------|
| Raman                             | Purighalla |                       | MD               |                                                     | Pittsburgh, PA                           | Site Principal investigator                             |                                                                                            |
| Nathan                            | Bennett    |                       | MD               |                                                     | Pittsburgh, PA                           | Site Principal investigator                             |                                                                                            |
| Gregory                           | Jay        |                       | MD PhD           | Brown University                                    | Providence, RI                           | Site Principal investigator                             |                                                                                            |
| David                             | Barbham    |                       | DO               | PharmaTex Research, LLC                             | Amarillo, TX                             | Site Principal investigator                             |                                                                                            |
| TJ                                | Milling    |                       | MD               | Ascension Seton                                     | Austin, TX                               | Site Principal investigator                             |                                                                                            |
| Dalla                             | Abdelsayed |                       | MD               |                                                     | Highlands, TX                            | Site Principal investigator                             |                                                                                            |
| David                             | McPherson  |                       | MD               |                                                     | Houston, TX                              | Site Principal investigator                             |                                                                                            |
| Patricia                          | Salvato    |                       | MD               |                                                     | Houston, TX                              | Site Principal investigator                             |                                                                                            |
| Chukwumeka                        | Orgwu      |                       | MD PhD           | Family Practice Doctors                             | Humble, TX                               | Site Principal investigator                             |                                                                                            |
| Anuradha                          | Mundluru   |                       | MD               |                                                     | Mesquite, TX                             | Site Principal investigator                             |                                                                                            |
| Patti                             | Olusola    |                       | MD               | University of Texas Health Sciences Center at Tyler | Tyler, TX                                | Site Principal investigator                             |                                                                                            |
| Sarah                             | Majercik   |                       | MD MBA           | Intermountain Medical Center                        | Salt Lake City, UT                       | Site Principal investigator                             |                                                                                            |
| William                           | Lewis      |                       | MD               | West Virginia University Eastern Division           | Harpers Ferry, WV                        | Site Principal investigator                             |                                                                                            |
