# Supplementary material
Source: PubMed Central journal article supplement (PMC8506296)
Supplement: jama-e2117272-s005.pdf [file jama-e2117272-s005.pdf]

Connors JM, Brooks MM, Scirba FC, et al; ACTIV-4B Investigators. Effect of antithrombotic therapy on clinical outcomes in outpatients with clinically stable symptomatic COVID-19: the ACTIV-4B randomized clinical trial. *JAMA*. doi:10.1001/jama.2021.17272

## Data Sharing Statement

### Data

**Data available:** Yes

**Data types:** Deidentified participant data

**How to access data:** NIH

**When available:** beginning date: 01-01-2023

### Supporting Documents

**Document types:** None

### Additional Information

**Who can access the data:** Researchers whose proposed use has been approved by NIH

**Types of analyses:** Open to most purposes

**Mechanisms of data availability:** After approval of a proposal
